# Supplementary material for: Short Chain Fatty Acids (SCFA) Reprogram Gene Expression in Human Malignant Epithelial and Lymphoid Cells
Source: PLoS One. 2016 Jul 21;11(7):e0154102. doi: 10.1371/journal.pone.0154102 (PMC4956219; doi:10.1371/journal.pone.0154102)
Supplement: S1 Table — (XLSX) [file pone.0154102.s001.xlsx]

## Sheet: Sheet1
Genes	Hone1But	Hone1_C	fold_change	log2foldchange
PMF1	0	61.4516	1.6273e-06	-19.2291
TM4SF19-TCTEX1D2	0	44.3403	2.25529e-06	-18.7583
ATF2	0	26.2449	3.81027e-06	-18.0017
MIR877	0	20.1078	4.97318e-06	-17.6174
MIR6743	0	12.1785	8.2112e-06	-16.894
SNORD4A	0	12.0093	8.32685e-06	-16.8738
MRPS24	0	9.60747	1.04086e-05	-16.5519
MIR6875	0	8.00623	1.24903e-05	-16.2888
SNORD50A	0	7.68598	1.30107e-05	-16.2299
SNORD76	0	7.11665	1.40516e-05	-16.1189
MIR1238	0	6.94516	1.43985e-05	-16.0837
SNORA45B	0	6.60032	1.51508e-05	-16.0102
SNORA70	0	6.40498	1.56128e-05	-15.9669
CTNND1	0	6.19837	1.61333e-05	-15.9196
MIR6789	0	6.13243	1.63068e-05	-15.9042
MIR6826	0	5.88198	1.70011e-05	-15.844
SNORD127	0	5.82271	1.71741e-05	-15.8294
MIR5047	0	5.76448	1.73476e-05	-15.8149
MIR7113	0	4.88515	2.04702e-05	-15.5761
MIR6886	0	4.72499	2.11641e-05	-15.528
MIR6769B	0	4.64844	2.15126e-05	-15.5045
SNORD54	0	4.57499	2.1858e-05	-15.4815
MIR6790	0	4.5748	2.18589e-05	-15.4814
SNORA78	0	4.53896	2.20315e-05	-15.4701
MIR6837	0	4.50337	2.22056e-05	-15.4587
SNORD29	0	4.43422	2.25519e-05	-15.4364
MIR6763	0	4.43368	2.25547e-05	-15.4362
SNORA4	0	4.20765	2.37662e-05	-15.3607
SNORD2	0	4.11749	2.42867e-05	-15.3295
MIR939	0	4.11749	2.42867e-05	-15.3295
SNORD74	0	4.00311	2.49806e-05	-15.2888
SNORD28	0	3.84299	2.60214e-05	-15.2299
SNORD84	0	3.69518	2.70623e-05	-15.1734
SNORD12C	0	3.64841	2.74092e-05	-15.155
ZNF559-ZNF177	0	3.64841	2.74092e-05	-15.155
MIR4723	0	3.55832	2.81031e-05	-15.1189
MIR25	0	3.43124	2.9144e-05	-15.0664
LOC102288414	0	3.35144	2.98379e-05	-15.0325
LOC101929089	0	3.23938	3.08701e-05	-14.9834
SNORD58C	0	3.20249	3.12257e-05	-14.9669
SNORD111	0	3.06539	3.26222e-05	-14.9038
MIR1237	0	2.82566	3.539e-05	-14.7863
SNORD12B	0	2.79829	3.57361e-05	-14.7723
C1QTNF9B-AS1	0	2.77139	3.6083e-05	-14.7583
TCEB3-AS1	0	2.75373	3.63143e-05	-14.7491
SNORD23	0	2.62022	3.81647e-05	-14.6774
ANKHD1-EIF4EBP3	0	2.62022	3.81648e-05	-14.6774
SNAR-F	0	2.34329	4.26751e-05	-14.5162
HIST1H4E	0	2.29356	4.36003e-05	-14.4853
ANKRD37	0	2.26058	4.42364e-05	-14.4644
TEX36	0	2.18825	4.56986e-05	-14.4175
SNORA72	0	2.18352	4.57977e-05	-14.4144
MSMP	0	2.16168	4.62603e-05	-14.3999
SNORA14B	0	2.13499	4.68385e-05	-14.3819
SNORA80B	0	2.1193	4.71855e-05	-14.3713
LINC01023	0	1.97866	5.05394e-05	-14.2722
SNORD15B	0	1.97414	5.0655e-05	-14.2689
SNORD15A	0	1.94746	5.13489e-05	-14.2493
LOC100422556	0	1.90038	5.26211e-05	-14.214
MSH5	0	1.8242	5.48185e-05	-14.155
ZNF670-ZNF695	0	1.74681	5.72471e-05	-14.0924
GSN	0	1.74088	5.74423e-05	-14.0875
ARMCX5-GPRASP2	0	1.67571	5.96763e-05	-14.0325
C1orf54	0	1.64074	6.09479e-05	-14.0021
LOC100505912	0	1.62838	6.14105e-05	-13.9912
NFATC2	0	1.62528	6.15277e-05	-13.9884
RARRES3	0	1.50705	6.63546e-05	-13.8794
AGER	0	1.45833	6.85714e-05	-13.832
LOC101929613	0	1.44112	6.93904e-05	-13.8149
LOC102060414	0	1.43395	6.97374e-05	-13.8077
TRAM1L1	0	1.42192	7.03272e-05	-13.7956
DISC1	0	1.39474	7.16979e-05	-13.7677
ATP6V1G3	0	1.36815	7.30913e-05	-13.7399
LOC101928663	0	1.35827	7.36233e-05	-13.7295
MYLPF	0	1.32011	7.57512e-05	-13.6884
TOB1-AS1	0	1.27083	7.86888e-05	-13.6335
OPA1-AS1	0	1.25313	7.98001e-05	-13.6132
LINC01358	0	1.22388	8.17073e-05	-13.5792
NPEPL1	0	1.17641	8.50045e-05	-13.5221
MRPL42P5	0	1.16219	8.60441e-05	-13.5046
EFHD1	0	1.16158	8.60896e-05	-13.5038
FBXL8	0	1.14716	8.71717e-05	-13.4858
C2orf54	0	1.14148	8.76054e-05	-13.4786
LOC101928243	0	1.12734	8.87041e-05	-13.4606
CCDC78	0	1.07949	9.26362e-05	-13.3981
BSCL2	0	1.07147	9.33301e-05	-13.3873
SMIM22	0	1.06582	9.38246e-05	-13.3797
MTCL1-AS1	0	1.05706	9.46023e-05	-13.3678
LINC00568	0	1.01846	9.81875e-05	-13.3141
FCGRT	0	0.996285	0.000100373	-13.2823
LOC101927843	0	0.96396	0.000103739	-13.2348
LOC100506713	0	0.962351	0.000103912	-13.2323
CORT	0	0.954385	0.00010478	-13.2204
EDN2	0	0.927511	0.000107815	-13.1791
NRN1L	0	0.910661	0.00010981	-13.1527
PNMT	0	0.902581	0.000110793	-13.1398
MYCBP2-AS1	0	0.900652	0.000111031	-13.1368
LOC101927323	0	0.894886	0.000111746	-13.1275
DDX39B	0	0.881419	0.000113453	-13.1056
TNFRSF18	0	0.87429	0.000114379	-13.0939
LINC00969	0	0.853997	0.000117096	-13.06
HIGD1B	0	0.843521	0.000118551	-13.0422
SCARNA9L	0	0.82823	0.000120739	-13.0158
FAM229A	0	0.824676	0.00012126	-13.0096
LOC101928105	0	0.819983	0.000121954	-13.0014
FABP5	0	0.788575	0.000126811	-12.945
NEURL2	0	0.783218	0.000127678	-12.9352
LOC100506125	0	0.778459	0.000128459	-12.9264
GALNT9	0	0.762025	0.000131229	-12.8956
LOC286437	0	0.74605	0.000134039	-12.8651
LOC100506321	0	0.732463	0.000136526	-12.8385
ATP5L2	0	0.721462	0.000138607	-12.8167
AGBL5-AS1	0	0.708167	0.00014121	-12.7899
SGK3	0	0.692846	0.000144332	-12.7583
CRYGS	0	0.684618	0.000146067	-12.7411
FOCAD-AS1	0	0.681381	0.000146761	-12.7342
LOC101929655	0	0.674208	0.000148322	-12.719
HIST1H2BF	0	0.670289	0.000149189	-12.7106
ZNF443	0	0.649153	0.000154047	-12.6643
CRISP2	0	0.640498	0.000156128	-12.645
LINC00515	0	0.640498	0.000156128	-12.645
TERC	0	0.639078	0.000156476	-12.6418
HIST3H2BB	0	0.637664	0.000156822	-12.6386
SUSD2	0	0.633858	0.000157764	-12.6299
LGALS8-AS1	0	0.627256	0.000159425	-12.6148
UPK2	0	0.617182	0.000162027	-12.5915
HIST1H2AI	0	0.61455	0.000162721	-12.5853
IL10RB-AS1	0	0.61455	0.000162721	-12.5853
HIST1H2AL	0	0.613243	0.000163068	-12.5822
SMG1P7	0	0.609676	0.000164022	-12.5738
LOC101927478	0	0.604243	0.000165496	-12.5609
PHKA2-AS1	0	0.599842	0.00016671	-12.5504
ATP6V1B1	0	0.594583	0.000168185	-12.5377
HIST1H2AM	0	0.591836	0.000168966	-12.531
RDH5	0	0.584633	0.000171047	-12.5133
RPH3AL	0	0.578531	0.000172852	-12.4982
MYLK-AS2	0	0.576448	0.000173476	-12.493
HOXC-AS2	0	0.571873	0.000174864	-12.4815
LOC101927269	0	0.568489	0.000175905	-12.4729
LINC00161	0	0.560747	0.000178333	-12.4531
NPTN-IT1	0	0.553001	0.000180832	-12.4331
ADD3-AS1	0	0.550571	0.000181629	-12.4267
MTRNR2L9	0	0.546915	0.000182844	-12.4171
S1PR4	0	0.542114	0.000184463	-12.4044
LINCR-0001	0	0.528852	0.000189089	-12.3686
LSAMP-AS1	0	0.525956	0.00019013	-12.3607
FRZB	0	0.520824	0.000192003	-12.3466
NOTUM	0	0.520025	0.000192298	-12.3444
FAM53A	0	0.519664	0.000192432	-12.3434
IGFL2	0	0.512586	0.000195089	-12.3236
GUCA2A	0	0.501259	0.000199498	-12.2913
LOC284009	0	0.500389	0.000199845	-12.2888
NDUFA4L2	0	0.499089	0.000200365	-12.2851
LINC01203	0	0.496938	0.000201232	-12.2789
HIST2H2BC	0	0.49523	0.000201926	-12.2739
LOC728819	0	0.492691	0.000202967	-12.2665
LOC101927102	0	0.479574	0.000208518	-12.2275
IBA57-AS1	0	0.478778	0.000208865	-12.2251
GCOM1	0	0.474834	0.0002106	-12.2132
ZRANB2-AS1	0	0.474053	0.000210947	-12.2108
ACTC1	0	0.468276	0.000213549	-12.1931
MEIG1	0	0.461159	0.000216845	-12.171
SERPINB9P1	0	0.460422	0.000217192	-12.1687
CCDC183-AS1	0	0.459199	0.00021777	-12.1649
CRYGC	0	0.458226	0.000218233	-12.1618
TRIM54	0	0.457257	0.000218696	-12.1588
SPDYA	0	0.453539	0.000220488	-12.147
LINC01431	0	0.453183	0.000220662	-12.1459
LOC101929181	0	0.448947	0.000222743	-12.1323
C3orf49	0	0.447206	0.000223611	-12.1267
C3orf80	0	0.447206	0.000223611	-12.1267
SH2B2	0	0.444333	0.000225056	-12.1174
OSMR-AS1	0	0.438697	0.000227948	-12.099
FAM174B	0	0.43853	0.000228034	-12.0985
IDI2-AS1	0	0.437366	0.000228642	-12.0946
ATE1-AS1	0	0.434727	0.000230029	-12.0859
LINC01057	0	0.433094	0.000230897	-12.0805
LOC101928696	0	0.430185	0.000232458	-12.0707
LOC103091866	0	0.421997	0.000236969	-12.043
LOC101928891	0	0.420765	0.000237662	-12.0388
SUMO4	0	0.41893	0.000238703	-12.0325
LOC101927211	0	0.417716	0.000239397	-12.0283
BACE1-AS	0	0.415309	0.000240785	-12.02
LEMD1	0	0.414115	0.000241479	-12.0158
HOXA6	0	0.413521	0.000241826	-12.0137
NPPB	0	0.412929	0.000242173	-12.0117
ZNF699	0	0.412929	0.000242173	-12.0117
LINC00589	0	0.412338	0.00024252	-12.0096
ZNF736	0	0.412141	0.000242635	-12.0089
CLEC11A	0	0.4097	0.000244081	-12.0004
GAPDHS	0	0.408829	0.000244601	-11.9973
LOC101929231	0	0.407096	0.000245642	-11.9912
LOC101929099	0	0.406522	0.000245989	-11.9891
C15orf56	0	0.406522	0.000245989	-11.9891
LINC01124	0	0.40614	0.00024622	-11.9878
GIP	0	0.405378	0.000246683	-11.9851
LOC100379224	0	0.403111	0.000248071	-11.977
KIFC2	0	0.402688	0.000248331	-11.9754
PRMT5-AS1	0	0.3981	0.000251193	-11.9589
PLAC8L1	0	0.397551	0.00025154	-11.9569
C2orf48	0	0.395912	0.000252581	-11.951
GMCL1P1	0	0.394422	0.000253535	-11.9455
CGB2	0	0.393749	0.000253969	-11.9431
LOC285074	0	0.392854	0.000254547	-11.9398
EID3	0	0.391343	0.00025553	-11.9342
ETV2	0	0.387659	0.000257959	-11.9206
C6orf100	0	0.381754	0.000261949	-11.8984
CRYBB2	0	0.377751	0.000264725	-11.8832
SUGT1P1	0	0.374804	0.000266806	-11.8719
UBE2E1-AS1	0	0.370468	0.000269929	-11.8551
PSAPL1	0	0.369518	0.000270623	-11.8514
C10orf111	0	0.366231	0.000273051	-11.8385
TEX37	0	0.362091	0.000276174	-11.8221
LOC100288123	0	0.359382	0.000278256	-11.8113
LINC00426	0	0.358488	0.00027895	-11.8077
TDRD12	0	0.356492	0.000280511	-11.7997
RPL10L	0	0.356272	0.000280684	-11.7988
GATSL3	0	0.355393	0.000281378	-11.7952
TMEM38A	0	0.354737	0.000281899	-11.7925
DPYD-AS2	0	0.352784	0.00028346	-11.7846
LINC01208	0	0.350638	0.000285195	-11.7758
ARL17A	0	0.349434	0.000286177	-11.7708
ZG16B	0	0.348097	0.000287276	-11.7653
HIF1A-AS2	0	0.347258	0.00028797	-11.7618
TMEM9B-AS1	0	0.346423	0.000288664	-11.7583
LRRC3	0	0.345179	0.000289705	-11.7531
LOC101929524	0	0.344354	0.000290399	-11.7497
IFNB1	0	0.343124	0.00029144	-11.7445
LOC729083	0	0.340288	0.000293868	-11.7325
PSMD6-AS2	0	0.33922	0.000294794	-11.728
CLEC3B	0	0.338291	0.000295603	-11.724
CRYBB3	0	0.333979	0.00029942	-11.7055
TYRO3P	0	0.333593	0.000299767	-11.7039
RFPL4AL1	0	0.333593	0.000299767	-11.7039
CEACAM6	0	0.332438	0.000300808	-11.6989
HOXB5	0	0.329776	0.000303236	-11.6873
SLC16A13	0	0.329776	0.000303236	-11.6873
OCLM	0	0.326045	0.000306706	-11.6709
BCL2A1	0	0.324943	0.000307747	-11.666
RPL21P44	0	0.323121	0.000309481	-11.6579
TAS2R19	0	0.320249	0.000312257	-11.645
SPRR3	0	0.319539	0.000312951	-11.6418
NXNL1	0	0.317427	0.000315033	-11.6322
NPM2	0	0.307871	0.000324811	-11.5881
C8orf31	0	0.307439	0.000325268	-11.5861
OR2K2	0	0.303075	0.000329952	-11.5655
ZNF577	0	0.301562	0.000331607	-11.5582
FAM167B	0	0.30149	0.000331686	-11.5579
TMEM52	0	0.30086	0.00033238	-11.5549
PLCXD2-AS1	0	0.299921	0.000333421	-11.5504
CHRNA3	0	0.298833	0.000334635	-11.5451
GPR75	0	0.29516	0.000338799	-11.5273
ZNF474	0	0.294557	0.000339493	-11.5243
IGSF23	0	0.29143	0.000343136	-11.5089
FABP7	0	0.288513	0.000346605	-11.4944
PRTN3	0	0.287936	0.000347299	-11.4915
KLB	0	0.284479	0.00035152	-11.4741
CTHRC1	0	0.282968	0.000353397	-11.4664
KLHL3	0	0.281813	0.000354845	-11.4605
RAB40AL	0	0.280101	0.000357014	-11.4517
C17orf50	0	0.279558	0.000357708	-11.4489
SMIM2	0	0.279017	0.000358402	-11.4461
SMKR1	0	0.278477	0.000359096	-11.4433
GS1-24F4.2	0	0.276607	0.000361524	-11.4336
COLCA2	0	0.275286	0.000363259	-11.4267
ZNF252P-AS1	0	0.274238	0.000364647	-11.4212
GLIPR1L2	0	0.272673	0.00036674	-11.413
PILRA	0	0.271142	0.00036881	-11.4048
FAM9B	0	0.271142	0.00036881	-11.4048
ZNF613	0	0.270023	0.000370339	-11.3989
RAB41	0	0.269117	0.000371586	-11.394
PGAM1P5	0	0.268991	0.000371759	-11.3933
LHFPL5	0	0.26849	0.000372453	-11.3907
LOC101927620	0	0.267866	0.000373321	-11.3873
LOC101927239	0	0.267618	0.000373668	-11.386
LOC101928303	0	0.267369	0.000374014	-11.3846
CAPZA3	0	0.267369	0.000374014	-11.3846
PDZD9	0	0.266874	0.000374708	-11.3819
LINC01106	0	0.264426	0.000378178	-11.3686
HSD3B7	0	0.263821	0.000379045	-11.3653
LOC101927948	0	0.261309	0.000382688	-11.3515
HHIP-AS1	0	0.26013	0.000384423	-11.345
LOC101929302	0	0.259896	0.00038477	-11.3437
DHRS4L1	0	0.259661	0.000385117	-11.3424
NKX6-1	0	0.258265	0.000387199	-11.3346
LPPR3	0	0.25815	0.000387372	-11.334
RARA-AS1	0	0.257803	0.000387893	-11.3321
LINC00884	0	0.256655	0.000389627	-11.3256
FLJ43681	0	0.255518	0.000391362	-11.3192
RAD51-AS1	0	0.253942	0.000393791	-11.3103
CD81-AS1	0	0.251944	0.000396913	-11.2989
ASPN	0	0.251614	0.000397434	-11.297
CYP27A1	0	0.251395	0.000397781	-11.2957
LOC148709	0	0.248362	0.000402638	-11.2782
LOC100289511	0	0.248041	0.000403158	-11.2764
CLEC4A	0	0.247615	0.000403852	-11.2739
THRSP	0	0.246556	0.000405587	-11.2677
EPHA6	0	0.246291	0.000406023	-11.2661
LOC113230	0	0.244051	0.000409751	-11.253
CD99	0	0.24302	0.000411488	-11.2469
PRC1-AS1	0	0.242002	0.00041322	-11.2408
FAM13A-AS1	0	0.241697	0.000413741	-11.239
LOC100129973	0	0.240789	0.000415302	-11.2336
CCDC157	0	0.240387	0.000415996	-11.2311
SGPP2	0	0.240187	0.000416343	-11.2299
ACTG2	0	0.239787	0.000417037	-11.2275
CHADL	0	0.238596	0.000419118	-11.2204
C19orf57	0	0.238202	0.000419812	-11.218
LOC101928909	0	0.237809	0.000420506	-11.2156
LINC01138	0	0.237613	0.000420853	-11.2144
BGN	0	0.235863	0.000423976	-11.2037
PMS2P5	0	0.234901	0.00042571	-11.1978
SH2D3C	0	0.234514	0.000426413	-11.1955
MTRNR2L8	0	0.233758	0.000427792	-11.1908
LINC00987	0	0.233474	0.000428312	-11.189
LOC654841	0	0.231691	0.000431608	-11.178
C22orf24	0	0.231134	0.000432649	-11.1745
TMEM216	0	0.227975	0.000438645	-11.1547
FAM86B2	0	0.227485	0.000439588	-11.1516
EPPIN-WFDC6	0	0.22677	0.000440976	-11.147
LINC01115	0	0.224824	0.000444793	-11.1346
LRRD1	0	0.223777	0.000446874	-11.1278
CCDC54	0	0.222739	0.000448956	-11.1211
CFHR1	0	0.222224	0.000449997	-11.1178
MTHFD2P1	0	0.222138	0.000450171	-11.1172
LOC100506655	0	0.221116	0.000452252	-11.1106
SSTR5	0	0.220567	0.000453378	-11.107
TSSK3	0	0.219182	0.000456242	-11.0979
FRAT1	0	0.217446	0.000459885	-11.0864
DNASE1L2	0	0.217364	0.000460059	-11.0859
LINC00473	0	0.216873	0.000461099	-11.0826
STAR	0	0.213895	0.000467518	-11.0627
EIF1AY	0	0.213026	0.000469426	-11.0568
RGL4	0	0.212633	0.000470294	-11.0542
LINC01424	0	0.210999	0.000473937	-11.043
LOC101929234	0	0.210076	0.000476018	-11.0367
ANO7	0	0.209465	0.000477406	-11.0325
EP300-AS1	0	0.209313	0.000477753	-11.0314
TUBA4B	0	0.208858	0.000478794	-11.0283
SCARA5	0	0.208305	0.000480066	-11.0245
SLC12A3	0	0.208217	0.000480269	-11.0239
LOC101928861	0	0.206464	0.000484345	-11.0117
TMEM217	0	0.205927	0.00048561	-11.0079
ACSM3	0	0.205199	0.000487333	-11.0028
SPAG8	0	0.201169	0.000497095	-10.9742
TRPV4	0	0.200714	0.000498222	-10.9709
TYRP1	0	0.200434	0.000498917	-10.9689
KLK9	0	0.200434	0.000498917	-10.9689
NOMO3	0	0.200341	0.000499149	-10.9682
DCN	0	0.200295	0.000499264	-10.9679
TSSK6	0	0.199878	0.000500305	-10.9649
PAOX	0	0.199325	0.000501693	-10.9609
EYA4-AS1	0	0.199187	0.00050204	-10.9599
RGS9BP	0	0.199187	0.00050204	-10.9599
CPB1	0	0.197414	0.00050655	-10.947
BST1	0	0.194746	0.000513489	-10.9274
MX2	0	0.19468	0.000513663	-10.9269
TEKT4	0	0.194483	0.000514183	-10.9254
RUNX1-IT1	0	0.193309	0.000517306	-10.9167
LOC101928417	0	0.19305	0.000518	-10.9148
LINC01205	0	0.19305	0.000518	-10.9148
DYNC1I1	0	0.19305	0.000518	-10.9148
RAPSN	0	0.192921	0.000518347	-10.9138
LOC100132215	0	0.192024	0.000520769	-10.9071
RAB3A	0	0.192021	0.000520775	-10.9071
PRDM8	0	0.191391	0.000522491	-10.9023
TOP1P2	0	0.189746	0.00052702	-10.8899
DFNB59	0	0.189123	0.000528755	-10.8851
FAM110D	0	0.189123	0.000528755	-10.8851
MLANA	0	0.189123	0.000528755	-10.8851
ZNF503-AS1	0	0.188999	0.000529102	-10.8842
LINC01139	0	0.188259	0.000531184	-10.8785
CETP	0	0.187524	0.000533266	-10.8729
CLDN18	0	0.186583	0.000535955	-10.8656
LINC00961	0	0.186432	0.000536388	-10.8644
FBXO6	0	0.186071	0.000537429	-10.8616
UCKL1-AS1	0	0.185891	0.000537949	-10.8602
SH3BP5-AS1	0	0.185771	0.000538296	-10.8593
DPEP1	0	0.185263	0.000539774	-10.8554
HDX	0	0.185175	0.000540031	-10.8547
LOC729603	0	0.18411	0.000543154	-10.8464
LOC100506136	0	0.182767	0.000547144	-10.8358
CNN1	0	0.18173	0.000550266	-10.8276
IBSP	0	0.181159	0.000552001	-10.823
PRKACG	0	0.181159	0.000552001	-10.823
VPS37D	0	0.179579	0.000556858	-10.8104
CXADRP3	0	0.179021	0.000558593	-10.8059
RAMP2-AS1	0	0.178246	0.000561022	-10.7997
ASB9P1	0	0.177369	0.000563797	-10.7925
LOC102546226	0	0.17726	0.000564144	-10.7916
APOBEC2	0	0.176392	0.00056692	-10.7846
ARRDC5	0	0.175961	0.000568308	-10.781
MYO1G	0	0.1758	0.000568828	-10.7797
LINC01126	0	0.175212	0.000570736	-10.7749
STPG2	0	0.174259	0.000573859	-10.767
NDUFA6-AS1	0	0.173838	0.000575247	-10.7635
BAAT	0	0.173228	0.000577273	-10.7585
PSG8	0	0.173108	0.000577675	-10.7575
DGKB	0	0.172486	0.000579757	-10.7523
POLR2J3	0	0.171562	0.00058288	-10.7445
CYP2D7P	0	0.171562	0.00058288	-10.7445
B3GALT4	0	0.170951	0.000584962	-10.7394
TIPARP-AS1	0	0.169943	0.000588431	-10.7308
COLEC10	0	0.169245	0.00059086	-10.7249
DNMT3L	0	0.169245	0.00059086	-10.7249
BCL2L14	0	0.168873	0.00059216	-10.7217
CCR3	0	0.167865	0.000595717	-10.7131
CIART	0	0.165456	0.000604391	-10.6922
MFAP4	0	0.164794	0.000606819	-10.6864
LOC642846	0	0.164747	0.000606993	-10.686
TMEM86B	0	0.164605	0.000607513	-10.6848
RLBP1	0	0.164511	0.00060786	-10.684
LDHAL6B	0	0.162747	0.000614452	-10.6684
LINC00211	0	0.162645	0.000614836	-10.6675
ASZ1	0	0.162211	0.000616482	-10.6637
ANGPTL2	0	0.16138	0.000619657	-10.6562
IL12RB2	0	0.160381	0.000623516	-10.6473
FOXH1	0	0.160303	0.00062382	-10.6466
SMAD5-AS1	0	0.159328	0.000627636	-10.6378
ENTPD1-AS1	0	0.159064	0.000628677	-10.6354
OXCT2	0	0.158018	0.000632841	-10.6259
KRT8P41	0	0.157672	0.000634229	-10.6227
CABP5	0	0.157672	0.000634229	-10.6227
CDC42P3	0	0.156985	0.000637004	-10.6164
NLRP12	0	0.156134	0.000640474	-10.6086
ASCL2	0	0.155881	0.000641515	-10.6062
HMGN2P46	0	0.155043	0.000644984	-10.5984
FLJ22184	0	0.154959	0.000645331	-10.5977
SPDEF	0	0.154461	0.000647413	-10.593
TBC1D26	0	0.154213	0.000648454	-10.5907
KRT83	0	0.15372	0.000650535	-10.5861
GPT	0	0.152823	0.000654352	-10.5776
ACRBP	0	0.152823	0.000654352	-10.5776
RFPL4B	0	0.151697	0.000659209	-10.567
DACT2	0	0.151342	0.000660757	-10.5636
CYP26A1	0	0.151265	0.00066109	-10.5629
HSF4	0	0.151211	0.000661326	-10.5624
PSG3	0	0.151061	0.000661985	-10.5609
CACNA2D1	0	0.150824	0.000663026	-10.5586
C5orf27	0	0.15043	0.00066476	-10.5549
LOC101929140	0	0.150039	0.000666495	-10.5511
TXNDC2	0	0.149649	0.00066823	-10.5474
WNT11	0	0.149571	0.000668577	-10.5466
LOC101928445	0	0.14903	0.000671006	-10.5414
LOC101593348	0	0.147053	0.000680026	-10.5221
LPAR4	0	0.14693	0.000680597	-10.5209
ZGLP1	0	0.145568	0.000686965	-10.5075
KLHDC8B	0	0.145201	0.0006887	-10.5038
PRG4	0	0.145128	0.000689047	-10.5031
SULT2A1	0	0.145055	0.000689394	-10.5024
GUSBP5	0	0.144909	0.000690088	-10.5009
EVPLL	0	0.144763	0.000690782	-10.4995
LAG3	0	0.144691	0.000691129	-10.4988
LOC101928241	0	0.144546	0.000691823	-10.4973
LDHD	0	0.143896	0.000694945	-10.4908
DCAF8L2	0	0.143181	0.000698415	-10.4836
LOC440173	0	0.142968	0.000699456	-10.4815
GIPR	0	0.142403	0.000702231	-10.4758
CELF4	0	0.142298	0.000702752	-10.4747
MIR646HG	0	0.141079	0.000708823	-10.4623
CDH5	0	0.139643	0.000716109	-10.4475
POU5F1	0	0.139576	0.000716456	-10.4468
SLC9A4	0	0.139306	0.000717844	-10.444
IHH	0	0.139104	0.000718885	-10.442
NODAL	0	0.138171	0.000723742	-10.4322
COL21A1	0	0.138138	0.000723916	-10.4319
EIF1B-AS1	0	0.137577	0.000726865	-10.426
MACROD2	0	0.137491	0.000727321	-10.4251
WNT5B	0	0.137348	0.000728078	-10.4236
AZIN2	0	0.136989	0.000729988	-10.4198
PDCD1	0	0.13647	0.000732763	-10.4144
AKR7L	0	0.136147	0.000734498	-10.411
SLC10A4	0	0.136083	0.000734845	-10.4103
CTGLF12P	0	0.134747	0.000742131	-10.396
KIRREL3	0	0.133455	0.000749317	-10.3821
DMRT3	0	0.132213	0.000756356	-10.3686
MAPK4	0	0.132213	0.000756356	-10.3686
TFAP2E	0	0.13179	0.000758785	-10.364
SRRM5	0	0.131489	0.000760519	-10.3607
CEBPA-AS1	0	0.130951	0.000763642	-10.3548
C6orf165	0	0.130124	0.000768499	-10.3457
CCDC17	0	0.129655	0.000771275	-10.3405
LOC284865	0	0.129423	0.000772663	-10.3379
LINC00942	0	0.128442	0.000778561	-10.3269
DES	0	0.128214	0.000779949	-10.3243
CCDC83	0	0.127307	0.0007855	-10.3141
FLJ42393	0	0.127195	0.000786194	-10.3128
KCNIP2	0	0.126748	0.000788969	-10.3077
LOC101927415	0	0.125478	0.000796949	-10.2932
PRKAG3	0	0.125369	0.000797643	-10.292
PNLIPRP3	0	0.12488	0.000800766	-10.2863
COL18A1-AS1	0	0.124697	0.000801942	-10.2842
ALPL	0	0.124503	0.000803194	-10.282
WBP2NL	0	0.124449	0.000803541	-10.2813
MMP9	0	0.123384	0.00081048	-10.2689
LOC283332	0	0.123173	0.000811868	-10.2665
ABCB1	0	0.122232	0.000818113	-10.2554
PI4KAP1	0	0.122129	0.000818807	-10.2542
CD36	0	0.121948	0.000820022	-10.2521
DNAAF1	0	0.121922	0.000820195	-10.2517
ALDH1A1	0	0.121665	0.00082193	-10.2487
CEMIP	0	0.121579	0.000822508	-10.2477
LOC283038	0	0.121511	0.000822971	-10.2469
ZFP2	0	0.119844	0.00083442	-10.2269
CGNL1	0	0.119694	0.000835461	-10.2251
PIPOX	0	0.119496	0.000836849	-10.2227
LOC158435	0	0.119003	0.000840318	-10.2168
NALCN-AS1	0	0.118222	0.00084587	-10.2073
LOC100505918	0	0.118076	0.00084691	-10.2055
SHC3	0	0.118028	0.000847257	-10.2049
HNF1A-AS1	0	0.117403	0.000851768	-10.1973
LOC100996251	0	0.117355	0.000852115	-10.1967
TSSK1B	0	0.116313	0.000859748	-10.1838
SHF	0	0.11529	0.000867381	-10.171
LTF	0	0.114922	0.000870156	-10.1664
CATSPERD	0	0.114693	0.000871891	-10.1636
ACVR2B-AS1	0	0.114511	0.000873279	-10.1613
CSDC2	0	0.113923	0.000877789	-10.1538
HGH1	0	0.113878	0.000878136	-10.1533
SMIM17	0	0.113385	0.000881953	-10.147
SEC1P	0	0.11334	0.000882299	-10.1464
GGT6	0	0.113073	0.000884381	-10.143
ALPI	0	0.113029	0.000884728	-10.1425
SND1-IT1	0	0.112193	0.00089132	-10.1318
C1orf220	0	0.111845	0.000894096	-10.1273
LAYN	0	0.111283	0.000898606	-10.12
LRMP	0	0.111199	0.000899289	-10.1189
LOC440600	0	0.110473	0.000905198	-10.1095
LOC151475	0	0.110473	0.000905198	-10.1095
C16orf71	0	0.110177	0.000907627	-10.1056
STARD4-AS1	0	0.109591	0.000912484	-10.0979
ZFP42	0	0.108928	0.000918036	-10.0892
ZCCHC5	0	0.108846	0.00091873	-10.0881
IRF8	0	0.108314	0.00092324	-10.081
ATP8B4	0	0.107867	0.000927069	-10.075
DENND1C	0	0.106987	0.000934689	-10.0632
TCP10L	0	0.106868	0.00093573	-10.0616
PCSK4	0	0.106631	0.000937812	-10.0584
ZNF233	0	0.105603	0.000946947	-10.0444
TNRC6C-AS1	0	0.104847	0.000953772	-10.0341
ADAP2	0	0.104847	0.000953772	-10.0341
ABRA	0	0.104657	0.000955507	-10.0314
CES3	0	0.102756	0.000973182	-10.005
MSTN	0	0.102243	0.000978058	-9.99779
ZNF442	0	0.102026	0.00098014	-9.99472
ANKLE1	0	0.101945	0.000980921	-9.99358
WNT2	0	0.101416	0.000986038	-9.98607
LOC101243545	0	0.101309	0.000987079	-9.98455
ZNF302	0	0.101273	0.000987426	-9.98404
HSPB7	0	0.0996626	0.00100339	-9.96091
PLIN1	0	0.0996281	0.00100373	-9.96041
C7orf65	0	0.0990121	0.00100998	-9.95146
VWA7	0	0.0989101	0.00101102	-9.94997
CCDC87	0	0.0988762	0.00101137	-9.94948
REG1P	0	0.0985382	0.00101484	-9.94454
LBH	0	0.0981021	0.00101935	-9.93814
CDH16	0	0.0975708	0.0010249	-9.93031
BEND3P3	0	0.097373	0.00102698	-9.92738
WNT3A	0	0.0969798	0.00103114	-9.92154
NPY6R	0	0.0964928	0.00103635	-9.91428
KCNH6	0	0.0955333	0.00104675	-9.89986
CLIP3	0	0.0935904	0.00106849	-9.87022
RFTN2	0	0.0925873	0.00108006	-9.85467
PCDHGA11	0	0.0924684	0.00108145	-9.85282
KLF17	0	0.0921433	0.00108527	-9.84773
LRFN1	0	0.0920256	0.00108665	-9.84589
RASGEF1A	0	0.0910902	0.00109781	-9.83115
ZNF750	0	0.0903241	0.00110712	-9.81897
TVP23A	0	0.09007	0.00111025	-9.8149
LOC285696	0	0.0889306	0.00112447	-9.79654
TRPC3	0	0.0883999	0.00113122	-9.7879
ADPRH	0	0.0883581	0.00113176	-9.78722
UROC1	0	0.0882769	0.0011328	-9.78589
FAM66C	0	0.0882499	0.00113315	-9.78545
CLDN16	0	0.0880611	0.00113557	-9.78236
LMO3	0	0.0871932	0.00114688	-9.76807
TMEM106A	0	0.0870505	0.00114876	-9.76571
PMFBP1	0	0.0865948	0.0011548	-9.75814
CPNE5	0	0.0863205	0.00115847	-9.75356
LOC101927954	0	0.0858065	0.00116541	-9.74494
TBX2	0	0.0852734	0.0011727	-9.73595
LOC286367	0	0.0844489	0.00118415	-9.72193
GCNT4	0	0.0838836	0.00119213	-9.71225
KLHL1	0	0.0838348	0.00119282	-9.71141
CRISPLD1	0	0.0832404	0.00120134	-9.70114
BCAS1	0	0.0829422	0.00120566	-9.69596
GPR113	0	0.0827276	0.00120879	-9.69223
LINC01301	0	0.0827042	0.00120913	-9.69182
NLRP4	0	0.0826094	0.00121052	-9.69016
TBX15	0	0.0824676	0.0012126	-9.68768
ANKRD20A8P	0	0.081673	0.00122439	-9.67372
LRRN3	0	0.0814653	0.00122752	-9.67004
MMP25	0	0.081167	0.00123203	-9.66475
DLGAP3	0	0.0803524	0.00124452	-9.6502
TM4SF18	0	0.0799654	0.00125054	-9.64323
CCDC158	0	0.0794882	0.00125805	-9.6346
SPACA6P-AS	0	0.0793569	0.00126013	-9.63221
PRIMA1	0	0.0789655	0.00126638	-9.62508
MAP7D2	0	0.0788928	0.00126754	-9.62375
SEMA4G	0	0.0786853	0.00127089	-9.61995
MMP24	0	0.0786638	0.00127123	-9.61956
UNC5A	0	0.0778353	0.00128476	-9.60428
LPPR5	0	0.0760686	0.0013146	-9.57116
RAB9B	0	0.0758684	0.00131807	-9.56736
ZNF667	0	0.0746695	0.00133924	-9.54437
GREM1	0	0.0745343	0.00134166	-9.54176
SCUBE2	0	0.0742831	0.0013462	-9.53689
TIE1	0	0.0739226	0.00135277	-9.52987
WNT4	0	0.073809	0.00135485	-9.52765
STEAP4	0	0.0730606	0.00136873	-9.51295
ITGA9	0	0.0727471	0.00137462	-9.50675
LMOD1	0	0.0726554	0.00137636	-9.50493
KCNH1	0	0.0718316	0.00139215	-9.48847
EXTL1	0	0.0718047	0.00139267	-9.48793
TMEM47	0	0.0710962	0.00140654	-9.47363
MIR133A1HG	0	0.0709737	0.00140897	-9.47114
NTSR1	0	0.0697541	0.00143361	-9.44614
ZBTB7C	0	0.0691019	0.00144714	-9.43258
UNC79	0	0.0680496	0.00146952	-9.41044
CAND2	0	0.0679614	0.00147142	-9.40857
VWA1	0	0.0675948	0.0014794	-9.40077
LOC100133331	0	0.0674524	0.00148253	-9.39773
CTAGE1	0	0.0667959	0.0014971	-9.38361
CNGB3	0	0.0663041	0.0015082	-9.37296
WDR64	0	0.0659552	0.00151618	-9.36534
LOC100506834	0	0.0656846	0.00152243	-9.35941
CD96	0	0.0650179	0.00153804	-9.34469
PSD2	0	0.0639078	0.00156475	-9.31985
A2M	0	0.0637523	0.00156857	-9.31633
TRPA1	0	0.0630274	0.00158661	-9.29983
LOC100130872	0	0.0627392	0.0015939	-9.29322
SLC5A1	0	0.062592	0.00159765	-9.28983
PZP	0	0.0625215	0.00159945	-9.28821
MAN1C1	0	0.0621039	0.00161021	-9.27854
TXLNGY	0	0.0620104	0.00161263	-9.27637
PDE1A	0	0.0613252	0.00163065	-9.26034
KCND1	0	0.0610644	0.00163761	-9.25419
ATP2A3	0	0.0610256	0.00163866	-9.25327
ANKRD62	0	0.0608967	0.00164212	-9.25022
IGSF9B	0	0.0605767	0.0016508	-9.24262
DGKI	0	0.0602979	0.00165843	-9.23596
TEX41	0	0.0602223	0.00166051	-9.23415
FREM1	0	0.059649	0.00167647	-9.22036
LOC101929431	0	0.0594277	0.00168272	-9.21499
CACNA2D2	0	0.0592135	0.0016888	-9.20978
SCART1	0	0.0587733	0.00170145	-9.19902
NAALADL2	0	0.0586775	0.00170423	-9.19666
MAST1	0	0.0585464	0.00170805	-9.19344
UNC5C	0	0.0583568	0.0017136	-9.18876
PTPRC	0	0.0582742	0.00171603	-9.18671
ADCY10	0	0.0580395	0.00172296	-9.18089
ADCY5	0	0.0580045	0.001724	-9.18002
CLIC5	0	0.0576444	0.00173477	-9.17104
KL	0	0.0575757	0.00173684	-9.16932
CRB1	0	0.0569163	0.00175697	-9.1527
ADGB	0	0.0564592	0.00177119	-9.14106
INPP5D	0	0.0555452	0.00180034	-9.11752
GOLGA8H	0	0.0547955	0.00182497	-9.09791
MROH2B	0	0.0545879	0.00183191	-9.09244
ZNF772	0	0.054423	0.00183746	-9.08807
IRF4	0	0.0541368	0.00184717	-9.08046
PDE7B	0	0.0535036	0.00186903	-9.06349
GPLD1	0	0.0526822	0.00189818	-9.04117
LRRTM2	0	0.0525094	0.00190442	-9.03643
NXPH3	0	0.0519136	0.00192628	-9.01997
PTGIS	0	0.051441	0.00194397	-9.00678
ZNF608	0	0.0510583	0.00195855	-8.996
SPTBN5	0	0.049185	0.00203314	-8.94207
ADAMTS18	0	0.0487441	0.00205153	-8.92909
CACNA1S	0	0.0467289	0.00214	-8.86817
SLC25A53	0	0.0464353	0.00215353	-8.85908
FER1L5	0	0.0456624	0.00218999	-8.83486
SLC6A4	0	0.0436307	0.00229197	-8.7692
PLCL1	0	0.0436175	0.00229266	-8.76876
ZNF578	0	0.0427569	0.0023388	-8.74001
ADAMTS2	0	0.0426746	0.00234332	-8.73723
MYH14	0	0.0424546	0.00235546	-8.72978
MALRD1	0	0.041893	0.00238703	-8.71057
GPC6	0	0.0405835	0.00246405	-8.66475
RGPD4	0	0.0401874	0.00248834	-8.6506
FLJ16779	0	0.0384607	0.00260006	-8.58724
LDLRAD4	0	0.0377251	0.00265076	-8.55938
NOTCH3	0	0.0357111	0.00280025	-8.48023
STAB2	0	0.0350212	0.00285542	-8.45208
LRP1B	0	0.0348707	0.00286773	-8.44587
MAGI2-AS3	0	0.0339407	0.00294632	-8.40687
SRGAP3	0	0.0325379	0.00307334	-8.34598
PKD1L1	0	0.0317602	0.00314859	-8.31108
CTNNA3	0	0.0274335	0.00364518	-8.0998
TTC28	0	0.0254705	0.00392611	-7.99268
DNAH9	0	0.0209618	0.00477059	-7.71162
RYR1	0	0.0187451	0.00533474	-7.55037
KSR2	0	0.0169464	0.00590096	-7.40483
CCDC168	0	0.0134245	0.00744906	-7.06873
CCDC85A	0.167347	2.31563	0.0722683	-3.79049
NEK11	0.119968	1.55629	0.0770862	-3.69738
DIO2	27.5989	336.785	0.0819482	-3.60914
MAP2K6	0.356631	3.70111	0.0963577	-3.37546
CARD8	0.95475	9.5799	0.0996618	-3.32682
CREB3L1	0.122978	1.16991	0.105117	-3.24993
LRRC26	0.27959	2.65979	0.105117	-3.24993
TMED6	0.354544	3.06621	0.115629	-3.11242
INHBB	0.520249	4.49928	0.115629	-3.11242
PDZD7	0.0836945	0.700934	0.119404	-3.06607
PHF21B	0.0997134	0.834329	0.119513	-3.06476
GPR64	0.0692728	0.539185	0.128477	-2.96042
CAPSL	0.377599	2.93904	0.128477	-2.96042
ARHGAP28	0.0602552	0.468996	0.128477	-2.96042
SAMD11	0.306456	2.12027	0.144537	-2.79049
C20orf196	0.288547	1.99636	0.144537	-2.79049
CPA3	1.38533	9.4135	0.147164	-2.7645
LDB3	0.0701576	0.447681	0.156713	-2.6738
C1orf145	0.138344	0.861623	0.160562	-2.63879
ZNF713	0.16139	0.977031	0.165185	-2.59785
TRIM31	0.164416	0.995347	0.165185	-2.59785
LOC102723354	0.738142	4.46859	0.165185	-2.59785
TMEM53	0.208295	1.26098	0.165185	-2.59785
CIRBP-AS1	0.245775	1.48788	0.165185	-2.59785
CAMK1	0.247051	1.4956	0.165185	-2.59785
USP18	0.16377	0.991434	0.165185	-2.59785
NPAS1	0.163128	0.987552	0.165185	-2.59785
SLC16A9	0.250768	1.44582	0.173444	-2.52746
TUBB1	0.285988	1.64888	0.173444	-2.52746
PEX6	0.190986	1.07361	0.177891	-2.49093
LOC399815	0.158474	0.822323	0.192715	-2.37546
LOC101928525	0.384396	1.99463	0.192715	-2.37546
BRD7P3	0.135421	0.7027	0.192715	-2.37546
HOXA10-AS	0.7106	3.6873	0.192715	-2.37546
RDH14	0.648388	3.36448	0.192715	-2.37546
ZFHX4-AS1	0.194896	1.01131	0.192715	-2.37546
SNORA8	2.39764	12.4413	0.192715	-2.37546
ACTR3C	0.30665	1.59121	0.192715	-2.37546
LOC101927934	0.300786	1.56078	0.192715	-2.37546
CLDN3	0.261594	1.35741	0.192715	-2.37546
LOC100128164	0.0552597	0.286743	0.192715	-2.37546
GLYCTK	0.147395	0.746695	0.197397	-2.34083
DPH1	1.2181	5.89932	0.206481	-2.27592
VASN	0.593855	2.87608	0.206481	-2.27592
COL5A2	0.336638	1.62204	0.20754	-2.26854
LOC652276	0.245594	1.16819	0.210235	-2.24993
CASC10	0.335114	1.594	0.210235	-2.24993
ATF5	19.1794	89.9838	0.213143	-2.23011
CHDH	0.35971	1.63322	0.220246	-2.18281
FBXL19-AS1	0.345986	1.57091	0.220246	-2.18281
SNHG21	6.04574	26.8936	0.224802	-2.15327
ZNF493	0.0704442	0.308236	0.22854	-2.12948
CREB3L3	0.127446	0.551098	0.231258	-2.11242
ALDH3A1	0.206958	0.894923	0.231258	-2.11242
CPLX1	0.155734	0.673421	0.231258	-2.11242
RHPN1	0.0897096	0.387919	0.231258	-2.11242
IQCD	0.243441	1.05268	0.231258	-2.11242
SLC12A8	0.0967685	0.418443	0.231258	-2.11242
RFFL	0.455263	1.96863	0.231258	-2.11242
MYLK4	0.0578596	0.250195	0.231258	-2.11242
VAMP1	0.662567	2.86505	0.231258	-2.11242
SNORA18	2.52478	10.9176	0.231258	-2.11242
NLGN1	0.40421	1.74787	0.231258	-2.11242
GCSAM	0.101267	0.437897	0.231258	-2.11242
TMOD1	0.220273	0.952495	0.231258	-2.11242
DTX2P1-UPK3BP1-PMS2P11	0.189251	0.818354	0.231258	-2.11242
SLC29A3	1.02907	4.41836	0.232908	-2.10217
BMP5	7.98622	33.4712	0.2386	-2.06733
LINC01111	1.01669	4.22049	0.240894	-2.05353
CDKN2B-AS1	0.539711	2.2093	0.244291	-2.03333
MATN2	0.486764	1.99217	0.244339	-2.03304
SYTL4	0.0919358	0.368762	0.24931	-2.00399
FSD2	0.230041	0.89526	0.256954	-1.96042
FAM179A	0.187864	0.731121	0.256954	-1.96042
STARD8	0.291093	1.13286	0.256954	-1.96042
CSPG5	0.308871	1.20205	0.256954	-1.96042
PANO	0.541464	2.10724	0.256954	-1.96042
CABLES1	0.665877	2.56254	0.25985	-1.94425
AGMAT	0.961668	3.69637	0.260166	-1.9425
CST6	3.28346	12.3051	0.266837	-1.90597
ACRC	0.314605	1.17902	0.266837	-1.90597
CASC1	0.139767	0.522216	0.267641	-1.90163
DCLK2	0.312857	1.14992	0.272069	-1.87796
EVI2A	1.74244	6.32908	0.275308	-1.86088
RHOBTB3	59.3374	213.967	0.27732	-1.85038
TROAP	12.2208	43.9253	0.278218	-1.84571
TNS3	2.97486	10.5937	0.280814	-1.83231
NALCN	0.46039	1.63688	0.28126	-1.83002
AMACR	0.971637	3.43124	0.283174	-1.82024
ARMC4	0.140016	0.491039	0.285141	-1.81025
LINC00883	3.67917	12.8159	0.287079	-1.80048
MICU3	0.0835895	0.289164	0.289073	-1.79049
NPIPB3	0.0920639	0.31848	0.289073	-1.79049
ENOX1	0.129249	0.447115	0.289073	-1.79049
SALL4	0.0956577	0.330912	0.289073	-1.79049
SKIDA1	0.151579	0.524362	0.289073	-1.79049
KCNIP3	0.127124	0.439766	0.289073	-1.79049
LOC653160	0.176614	0.610968	0.289073	-1.79049
LOC100129138	0.275659	0.953595	0.289073	-1.79049
SLC4A8	0.168162	0.581728	0.289073	-1.79049
SERHL2	0.202351	0.699998	0.289073	-1.79049
CDK11A	0.350259	1.21166	0.289073	-1.79049
TPI1P3	0.274523	0.949668	0.289073	-1.79049
SBF1P1	0.0544116	0.188228	0.289073	-1.79049
UCN2	0.224425	0.776361	0.289073	-1.79049
SIX5	0.400206	1.38444	0.289073	-1.79049
SULT2B1	0.313748	1.08536	0.289073	-1.79049
ARL14EPL	0.519114	1.79579	0.289073	-1.79049
MESP1	0.286808	0.992166	0.289073	-1.79049
CHRNA10	0.171348	0.592749	0.289073	-1.79049
GRAMD2	0.101237	0.350212	0.289073	-1.79049
ADCK3	1.70967	5.91431	0.289073	-1.79049
IDH1-AS1	0.67876	2.34806	0.289073	-1.79049
LOC101927181	0.161234	0.557763	0.289073	-1.79049
MIR6740	2.9493	10.2026	0.289073	-1.79049
LRRC7	0.160098	0.553833	0.289073	-1.79049
C11orf48	0.522369	1.80705	0.289073	-1.79049
LOC101927631	1.09031	3.77174	0.289073	-1.79049
MPZ	0.340943	1.17943	0.289073	-1.79049
NFE2	0.227589	0.787308	0.289073	-1.79049
LOC102724224	0.508036	1.75746	0.289073	-1.79049
LOC101929340	0.558404	1.93171	0.289073	-1.79049
CTBP1-AS	0.101576	0.351386	0.289073	-1.79049
PARD3B	0.0890329	0.307995	0.289073	-1.79049
TAF7L	0.160351	0.554707	0.289073	-1.79049
HERC2P3	0.155807	0.538989	0.289073	-1.79049
LOC553103	0.223223	0.772201	0.289073	-1.79049
MUC16	0.0152123	0.0526245	0.289073	-1.79049
KLHL31	0.116062	0.401496	0.289073	-1.79049
NLRC3	0.0521144	0.180281	0.289073	-1.79049
LHX4	0.214185	0.740936	0.289073	-1.79049
ARHGEF26	1.34422	4.53371	0.296495	-1.75392
NAAA	1.43112	4.796	0.298398	-1.74469
VAV3	2.65451	8.80021	0.301641	-1.72909
FAM222A	0.636824	2.1112	0.301641	-1.72909
MEGF6	0.492806	1.62729	0.302838	-1.72338
SLIT2	0.47087	1.5384	0.306077	-1.70803
C2CD3	1.92594	6.22796	0.309241	-1.6932
C1orf53	6.34338	20.2559	0.313162	-1.67502
PRICKLE1	2.6546	8.46571	0.313571	-1.67314
ALPP	4.766	15.1803	0.31396	-1.67135
LOC400043	0.716712	2.27273	0.315352	-1.66496
SYNGR3	0.487476	1.54581	0.315352	-1.66496
PRR16	1.51229	4.74107	0.318977	-1.64847
LINC01245	5.159	16.062	0.321192	-1.63849
DAPK1	0.293815	0.914763	0.321192	-1.63849
PDE3B	0.273622	0.851894	0.321192	-1.63849
ALDH5A1	0.25981	0.786423	0.330369	-1.59785
ZNF876P	0.255674	0.773904	0.330369	-1.59785
TMPPE	0.197611	0.598153	0.330369	-1.59785
SENP8	1.42172	4.30343	0.330369	-1.59785
RABEP2	1.21687	3.68338	0.330369	-1.59785
C4BPB	2.10266	6.36457	0.330369	-1.59785
NEU3	0.485111	1.46839	0.330369	-1.59785
FAM86C2P	0.358549	1.0853	0.330369	-1.59785
PERM1	0.220166	0.666426	0.330369	-1.59785
ZNF565	0.338175	1.02363	0.330369	-1.59785
RGS7	3.93923	11.8315	0.332946	-1.58664
LOC101927811	1.67473	4.9199	0.340399	-1.5547
LOXL4	1.00246	2.91613	0.343763	-1.54052
LYPD1	3.5478	10.2332	0.346695	-1.52826
B3GNT4	0.66477	1.91638	0.346888	-1.52746
CMPK2	0.447422	1.28982	0.346888	-1.52746
LIPT2	1.04147	3.00233	0.346888	-1.52746
GATA4	0.586745	1.69146	0.346888	-1.52746
CHMP3	5.15368	14.8569	0.346888	-1.52746
KAT2A	7.60355	21.8576	0.347868	-1.52339
PIK3R3	0.877975	2.51154	0.349577	-1.51632
CXXC5	1.61223	4.58131	0.351915	-1.5067
C8orf82	1.25492	3.56598	0.351915	-1.5067
ANO2	1.0075	2.85159	0.353312	-1.50099
NTRK2	0.0377007	0.106615	0.353616	-1.49974
ANKRD10	16.9525	47.8253	0.354468	-1.49627
GLCCI1	4.8078	13.5585	0.354596	-1.49575
TJP3	0.465246	1.30767	0.355782	-1.49093
HOXC4	0.819412	2.30313	0.355782	-1.49093
ZNF595	1.07075	3.00957	0.355782	-1.49093
ALDH3B1	2.94108	8.20866	0.358289	-1.4808
TFR2	0.420514	1.16784	0.360077	-1.47362
TMC5	0.98393	2.73015	0.360395	-1.47235
HSD17B1	0.74691	2.06705	0.361341	-1.46857
KCNQ1	0.628519	1.73941	0.361341	-1.46857
MYPN	1.8276	5.04693	0.362121	-1.46546
IMPA2	4.55348	12.5641	0.36242	-1.46427
CDKN1C	15.3555	42.2991	0.363022	-1.46187
PPME1	27.0253	73.8355	0.366021	-1.45
TEKT4P2	8.67326	23.678	0.3663	-1.4489
PM20D2	28.0084	75.8485	0.369268	-1.43726
ZFAT	0.586616	1.58539	0.370014	-1.43435
IFT122	0.845437	2.28387	0.370178	-1.43371
ITGBL1	4.85786	13.0935	0.371012	-1.43046
RPARP-AS1	8.86904	23.8958	0.371156	-1.4299
LOXL3	0.52593	1.41633	0.371332	-1.42922
ZNF600	1.17764	3.16854	0.371665	-1.42792
CYP1B1	1.94026	5.20179	0.372998	-1.42276
INSIG1	13.8557	37.0089	0.374387	-1.4174
UNKL	8.66202	23.1212	0.374635	-1.41644
EVI2B	4.00928	10.691	0.375014	-1.41498
TM6SF1	4.58799	12.221	0.37542	-1.41342
WTAP	37.4262	99.5948	0.375785	-1.41202
GOLGA8B	1.02262	2.72022	0.375932	-1.41146
PGAP3	0.392546	1.04372	0.376104	-1.4108
ANKRD36BP1	2.52205	6.69926	0.376467	-1.4094
NPAS3	0.112345	0.296273	0.379194	-1.39899
RPS6KA5	4.6443	12.1984	0.38073	-1.39316
ZNF714	4.54015	11.8855	0.381989	-1.3884
TMPRSS3	0.327175	0.853705	0.383241	-1.38368
CDKN2C	15.6495	40.7408	0.384124	-1.38036
MIR6779	5.20685	13.5105	0.385393	-1.3756
MIR3682	3.96747	10.2936	0.38543	-1.37546
CSRNP3	0.0291355	0.075592	0.385431	-1.37546
SLC19A3	0.0884713	0.229539	0.385431	-1.37546
TSIX	0.0225725	0.0585643	0.385431	-1.37546
LOC101927284	0.115159	0.298781	0.385431	-1.37546
LOC100132891	0.101514	0.263379	0.385431	-1.37546
SYNE3	0.101762	0.264022	0.385431	-1.37546
TET1	0.0695474	0.180441	0.385431	-1.37546
CALHM3	0.201738	0.523409	0.385431	-1.37546
LINC00648	0.115479	0.299609	0.385431	-1.37546
TIGD4	0.134818	0.349787	0.385431	-1.37546
ROS1	0.0452323	0.117355	0.385431	-1.37546
LINC00689	0.0830479	0.215468	0.385431	-1.37546
DOCK2	0.0546615	0.141819	0.385431	-1.37546
DCAF4L1	0.139678	0.362394	0.385431	-1.37546
RBM44	0.0778126	0.201885	0.385431	-1.37546
BTC	0.251906	0.653569	0.385431	-1.37546
THBS4	0.107925	0.28001	0.385431	-1.37546
FOXO6	0.139502	0.361939	0.385431	-1.37546
C6orf164	0.21391	0.554989	0.385431	-1.37546
SRD5A1P1	0.309301	0.80248	0.385431	-1.37546
PCDH9	0.163235	0.423513	0.385431	-1.37546
FAM47E	0.326417	0.846888	0.385431	-1.37546
C10orf95	0.345717	0.896963	0.385431	-1.37546
HECW2	0.192476	0.499378	0.385431	-1.37546
LINC00668	0.190332	0.493816	0.385431	-1.37546
PRKAR2A-AS1	0.0983391	0.255141	0.385431	-1.37546
PTGER2	0.134492	0.34894	0.385431	-1.37546
NPFF	0.562958	1.4606	0.385431	-1.37546
GLDN	0.0655659	0.170111	0.385431	-1.37546
IGFLR1	0.55731	1.44594	0.385431	-1.37546
C11orf86	0.281242	0.729681	0.385431	-1.37546
LOC143666	0.160381	0.416108	0.385431	-1.37546
PTGES3L	0.606499	1.57356	0.385431	-1.37546
ISM1	0.128577	0.333593	0.385431	-1.37546
SNORD36A	9.25754	24.0187	0.385431	-1.37546
MIR6752	4.69396	12.1785	0.385431	-1.37546
MT1M	1.51487	3.93033	0.385431	-1.37546
SNORD49A	4.69396	12.1785	0.385431	-1.37546
MIR6834	4.11446	10.675	0.385431	-1.37546
EGLN3	1.71411	4.44725	0.385431	-1.37546
CLDN9	0.812857	2.10896	0.385431	-1.37546
FTH1P3	0.698682	1.81273	0.385431	-1.37546
MYLK-AS1	2.31841	6.01511	0.385431	-1.37546
ZNF596	0.130032	0.337367	0.385431	-1.37546
VWF	0.0754605	0.195782	0.385431	-1.37546
LINC00628	0.25835	0.670289	0.385431	-1.37546
LOC100129148	1.65807	4.30185	0.385431	-1.37546
LOC101929225	0.29467	0.76452	0.385431	-1.37546
CACNB2	0.0906238	0.235123	0.385431	-1.37546
ACRV1	0.365697	0.9488	0.385431	-1.37546
CERS1	0.652833	1.69378	0.385431	-1.37546
HIST1H3G	0.713643	1.85155	0.385431	-1.37546
C20orf195	0.299974	0.778283	0.385431	-1.37546
LOC100507250	0.385508	1.0002	0.385431	-1.37546
PANDAR	0.885183	2.29661	0.385431	-1.37546
TGFBR3L	0.265343	0.688433	0.385431	-1.37546
CTC-338M12.4	0.472725	1.22649	0.385431	-1.37546
BOLA3-AS1	0.0820057	0.212764	0.385431	-1.37546
BMPER	0.0662436	0.171869	0.385431	-1.37546
LMO1	0.412392	1.06995	0.385431	-1.37546
AXIN2	0.0787503	0.204318	0.385431	-1.37546
LOC100505812	0.340073	0.882319	0.385431	-1.37546
SLC25A5-AS1	0.116488	0.302227	0.385431	-1.37546
ACE2	0.0950303	0.246556	0.385431	-1.37546
FABP3	0.303802	0.788215	0.385431	-1.37546
ALX4	0.0609717	0.158191	0.385431	-1.37546
CCDC61	0.36563	0.948626	0.385431	-1.37546
MKRN9P	0.182514	0.473534	0.385431	-1.37546
PROCA1	0.267258	0.693402	0.385431	-1.37546
TMC4	0.270622	0.702129	0.385431	-1.37546
MYO15B	0.0354469	0.0919669	0.385431	-1.37546
FBXO36	0.236782	0.614332	0.385431	-1.37546
LMOD3	0.0813055	0.210947	0.385431	-1.37546
C9orf163	0.143466	0.372222	0.385431	-1.37546
PRLR	0.030133	0.0781801	0.385431	-1.37546
SMOC1	0.0901952	0.234011	0.385431	-1.37546
GAB2	0.0561093	0.145576	0.385431	-1.37546
KCNRG	1.41017	3.65869	0.385431	-1.37545
FLT1	0.0467881	0.120022	0.389828	-1.35909
WBSCR16	1.93682	4.90543	0.394832	-1.34069
WNT10B	1.54748	3.89328	0.397475	-1.33106
DIS3L2	1.40406	3.5303	0.397717	-1.33018
CNKSR3	5.47193	13.6612	0.400546	-1.31996
CP	0.231293	0.572903	0.403721	-1.30857
LOC100506990	0.557884	1.38086	0.404011	-1.30753
CBWD1	2.8006	6.92015	0.404702	-1.30507
D2HGDH	1.57001	3.86359	0.406361	-1.29917
TRIM46	0.170996	0.419166	0.407943	-1.29356
GRIP1	0.398729	0.977031	0.408103	-1.29299
C19orf40	1.75714	4.30563	0.408103	-1.29299
KAT5	3.13667	7.68598	0.408103	-1.29299
LOC100505549	1.06932	2.62022	0.408103	-1.29299
ANK1	0.264347	0.644682	0.410043	-1.28615
CLPB	3.33918	8.10456	0.412012	-1.27924
MPI	3.40768	8.25182	0.412961	-1.27592
SLCO1B7	0.86654	2.09836	0.412962	-1.27592
PRR15	0.993061	2.40473	0.412962	-1.27592
ZBED3	2.34864	5.6873	0.412962	-1.27592
KIAA1958	1.27876	3.08893	0.413981	-1.27236
SMAD6	1.62119	3.90575	0.415079	-1.26854
PDE5A	1.23076	2.96483	0.41512	-1.2684
MLST8	15.2071	36.509	0.41653	-1.26351
LOC101927151	3.20453	7.6643	0.418111	-1.25804
PTCH1	1.17415	2.80263	0.418946	-1.25516
LARGE	0.322157	0.766183	0.42047	-1.24993
LRRC17	0.618028	1.46985	0.42047	-1.24993
GPRC5B	0.468571	1.1144	0.42047	-1.24993
ARHGAP11B	1.3108	3.11747	0.42047	-1.24993
SLC7A7	0.635214	1.51072	0.42047	-1.24993
HOGA1	0.668884	1.5908	0.42047	-1.24993
SBSN	0.16781	0.39865	0.420946	-1.24829
LINC00997	1.36498	3.23079	0.422491	-1.24301
SLC43A2	0.616519	1.45766	0.422952	-1.24143
SUCLG2-AS1	1.73038	4.08615	0.423475	-1.23965
AP5S1	6.08294	14.3474	0.423974	-1.23795
AVEN	8.70728	20.5202	0.424327	-1.23675
IRAK3	0.577665	1.35601	0.426002	-1.23107
DCAKD	2.96843	6.94654	0.427325	-1.22659
WDR72	2.15187	5.03476	0.427403	-1.22633
FOXC1	11.0156	25.7388	0.427978	-1.22439
PEBP1	314.719	733.415	0.429114	-1.22057
ZNF85	1.55395	3.61662	0.429669	-1.2187
MMP12	2.8424	6.60642	0.430248	-1.21676
KAT6B	3.62869	8.43159	0.430369	-1.21635
TYMS	21.5014	49.9132	0.430776	-1.21499
SRGN	27.7224	64.1077	0.432435	-1.20945
ADI1	55.6778	128.635	0.432837	-1.20811
TLL2	0.147661	0.340539	0.43361	-1.20553
ZBTB12	0.579939	1.33747	0.43361	-1.20553
NRL	0.506491	1.16808	0.43361	-1.20553
LOC100130744	0.841949	1.94172	0.43361	-1.20553
DOCK3	0.114199	0.263369	0.43361	-1.20553
CTRL	1.86359	4.29784	0.43361	-1.20553
FAM171B	0.281242	0.648606	0.43361	-1.20553
HDAC6	0.73175	1.68758	0.43361	-1.20553
LOC102724927	0.725554	1.67329	0.43361	-1.20553
ITPKA	0.540732	1.24705	0.43361	-1.20553
TMEM238	10.0686	23.0753	0.436337	-1.19649
LRRC45	2.17992	4.99041	0.436822	-1.19488
GABPB1-AS1	3.10743	7.10243	0.437516	-1.19259
PIK3C2B	0.481986	1.09893	0.438594	-1.18904
ERMAP	0.806348	1.83056	0.440492	-1.18281
LOC54944	1.21272	2.75311	0.440492	-1.18281
GRIK1	0.109863	0.24854	0.442032	-1.17778
SOX2	5.1742	11.7034	0.442112	-1.17752
N6AMT1	5.05637	11.4089	0.443197	-1.17398
METTL7A	0.491551	1.10528	0.444728	-1.16901
LY6G5C	2.29526	5.16104	0.444728	-1.16901
CSGALNACT1	0.460321	1.03506	0.444728	-1.16901
ELF3	3.40398	7.63569	0.445799	-1.16553
TRIM16	3.1018	6.95474	0.445998	-1.16489
CAMKK2	4.97509	11.1447	0.446407	-1.16357
THRIL	16.8693	37.7182	0.447245	-1.16086
ZBTB44	5.42369	12.0968	0.448358	-1.15728
EFCAB2	5.6469	12.5604	0.449581	-1.15335
CCNO	1.62912	3.62293	0.449669	-1.15306
PAQR4	5.10258	11.3461	0.44972	-1.1529
JADE2	5.47689	12.1471	0.450879	-1.14919
LANCL2	5.58897	12.3818	0.451387	-1.14756
RNMTL1	11.2876	24.9838	0.451796	-1.14626
TNFSF9	31.6257	69.9355	0.452213	-1.14492
P4HTM	1.42899	3.15824	0.452462	-1.14413
CREG2	1.71986	3.80112	0.452462	-1.14413
THEM6	3.97453	8.78422	0.452462	-1.14413
CASD1	4.03809	8.91645	0.452881	-1.1428
C9orf41	9.29761	20.5181	0.453142	-1.14197
ZNF488	1.04862	2.30843	0.454258	-1.13842
CAPN10	1.68242	3.70366	0.454258	-1.13842
FANCC	3.12079	6.86788	0.454403	-1.13795
CCDC169	2.08621	4.59015	0.454496	-1.13766
TMEM56	6.59492	14.4964	0.454935	-1.13627
E2F8	3.49303	7.66842	0.455509	-1.13445
DIS3L	15.3113	33.5981	0.455721	-1.13378
MVB12B	1.47999	3.24572	0.455984	-1.13295
HMGN2	15.2333	33.3749	0.456431	-1.13153
DPH3P1	3.07446	6.73587	0.456431	-1.13153
PLAC8	71.5474	156.63	0.456792	-1.13039
S100A4	11.0656	24.2063	0.457139	-1.1293
NCOA2	0.92019	2.01293	0.457139	-1.1293
SMG9	2.97437	6.49209	0.458154	-1.1261
LRRK1	1.61591	3.51263	0.46003	-1.1202
SERPINB6	38.8497	84.3029	0.460835	-1.11768
LINC00478	0.767243	1.6632	0.461305	-1.11621
IVD	7.79454	16.8839	0.461654	-1.11512
SCNM1	3.66232	7.91824	0.462517	-1.11242
CA11	0.430861	0.931558	0.462517	-1.11242
RELN	0.0576345	0.124611	0.462517	-1.11242
CACNG8	0.076968	0.166411	0.462517	-1.11242
RPS6KL1	0.128305	0.277405	0.462517	-1.11242
MRS2P2	0.247785	0.535733	0.462517	-1.11242
CLK2P	0.367849	0.79532	0.462517	-1.11242
LINC00601	0.57067	1.23384	0.462517	-1.11242
ATF7IP2	1.48188	3.20395	0.462517	-1.11242
HRG	0.332772	0.719481	0.462517	-1.11242
GDF9	0.381317	0.82444	0.462517	-1.11242
HOXA13	1.32566	2.86619	0.462517	-1.11242
JRK	2.22862	4.81846	0.462517	-1.11242
LOC401127	2.02105	4.36968	0.462517	-1.11242
HIST3H2A	1.34384	2.90549	0.462517	-1.11242
RALGAPA1	5.35376	11.5753	0.462517	-1.11242
FAAH2	1.65642	3.58131	0.462517	-1.11242
PCBP2-OT1	1.34113	2.89964	0.462517	-1.11242
PWAR5	1.02957	2.22601	0.462517	-1.11242
LOC100507424	3.12198	6.74998	0.462517	-1.11242
WDR24	1.68478	3.64264	0.462517	-1.11242
LOC100507459	0.956302	2.0676	0.462517	-1.11242
SLC27A3	0.55246	1.19446	0.462517	-1.11242
GCNT3	0.299974	0.648569	0.462517	-1.11242
LOC100130987	0.784168	1.69544	0.462517	-1.11242
L3MBTL1	0.221719	0.479375	0.462517	-1.11242
MUC13	0.463521	1.00217	0.462517	-1.11242
LOC100499489	0.266085	0.575298	0.462517	-1.11242
LOC100506639	0.499283	1.07949	0.462517	-1.11242
SSR4P1	0.295322	0.638512	0.462517	-1.11242
ALPPL2	0.267258	0.577835	0.462517	-1.11242
DGCR5	0.209671	0.453325	0.462517	-1.11242
LOC100288748	0.305333	0.660156	0.462517	-1.11242
DBIL5P	0.221885	0.479734	0.462517	-1.11242
COBL	0.773358	1.67092	0.462833	-1.11143
PTPLB	19.373	41.7646	0.463861	-1.10823
TLCD1	14.1607	30.4743	0.464678	-1.1057
PLCE1	1.16675	2.50854	0.465111	-1.10435
LIFR	7.67278	16.4588	0.466181	-1.10104
LRRC61	9.40448	20.1638	0.466404	-1.10035
KHK	0.599953	1.28385	0.467308	-1.09755
NR2F2	48.2043	103.104	0.467528	-1.09687
ZNF519	0.67819	1.44888	0.468079	-1.09518
RPS18P9	5.159	11.0055	0.468767	-1.09306
DANCR	88.8724	189.453	0.469101	-1.09203
SAPCD2	15.7376	33.5372	0.469258	-1.09155
INTU	1.11938	2.3762	0.471082	-1.08595
ZNF500	1.1273	2.393	0.471082	-1.08595
CYB5RL	1.03764	2.20268	0.471082	-1.08595
IQSEC2	1.42569	3.02428	0.471414	-1.08493
EI24	98.0026	207.645	0.471971	-1.08323
KCTD1	4.37109	9.25817	0.472133	-1.08273
ZNF426	1.30184	2.75214	0.473029	-1.08
PRDM10	2.09774	4.40799	0.475894	-1.07129
CNNM3	2.44436	5.13392	0.47612	-1.0706
APBA2	0.647848	1.36068	0.47612	-1.0706
ZNF234	0.520504	1.09322	0.47612	-1.0706
NME2	23.5346	49.3248	0.477135	-1.06753
UBIAD1	4.10433	8.59782	0.477368	-1.06683
MED16	3.53331	7.39289	0.477934	-1.06512
PANK1	1.71986	3.59735	0.478092	-1.06464
PIAS1	8.7703	18.33	0.478466	-1.06351
COG2	10.2562	21.4221	0.47877	-1.0626
SCML2	3.25491	6.79709	0.478869	-1.0623
NR3C1	19.0034	39.6643	0.479106	-1.06158
OBSCN	0.135779	0.283321	0.47924	-1.06118
PSMB5	219.434	456.923	0.480242	-1.05817
PHKA1	3.19537	6.642	0.481085	-1.05564
SYNE2	1.84913	3.84282	0.481191	-1.05532
MAZ	77.4102	160.849	0.481261	-1.05511
TMEM143	0.740932	1.53788	0.481788	-1.05353
C4orf29	1.52387	3.16295	0.481788	-1.05353
TSEN2	6.84781	14.2133	0.481788	-1.05353
LOC100996324	2.90306	6.02559	0.481788	-1.05353
KMT2E-AS1	0.462877	0.960747	0.481788	-1.05353
HCG4	1.21366	2.51907	0.481788	-1.05353
FADS1	26.4872	54.9095	0.48238	-1.05176
STRA13	66.4709	137.571	0.483177	-1.04938
ZNF395	11.7984	24.3688	0.484162	-1.04644
NKX2-5	1.59747	3.28116	0.48686	-1.03842
P2RX5	4.1018	8.42501	0.48686	-1.03842
ZNF322	0.563911	1.15826	0.48686	-1.03842
LEPR	1.07291	2.20373	0.48686	-1.03842
GPR158	0.43989	0.903524	0.48686	-1.03842
KATNB1	3.02287	6.20891	0.48686	-1.03842
C16orf59	3.88953	7.96688	0.488212	-1.03442
PHF10	5.33909	10.936	0.488212	-1.03442
NUCKS1	199.891	409.239	0.488445	-1.03373
PABPC1P2	0.931872	1.90489	0.489201	-1.0315
ZNF584	3.24567	6.63464	0.489201	-1.0315
TMEM183A	6.90393	14.1127	0.489201	-1.0315
SLC37A1	1.18487	2.42205	0.489201	-1.0315
TLE4	2.23887	4.56831	0.490087	-1.02889
LINC01446	1.33921	2.73002	0.490548	-1.02753
EP400NL	3.03171	6.18024	0.490548	-1.02753
WDR62	1.5501	3.15862	0.490752	-1.02693
MAP3K3	2.72429	5.5492	0.490934	-1.0264
SPAG5	21.4421	43.3699	0.494401	-1.01625
OSR2	3.342	6.75645	0.494638	-1.01556
MBNL1-AS1	0.178156	0.35951	0.495554	-1.01289
RRN3P3	0.996327	2.01053	0.495554	-1.01289
TYMSOS	2.98007	6.01362	0.495554	-1.01289
C7orf55	5.72959	11.562	0.495554	-1.01289
TOLLIP-AS1	0.999814	2.01757	0.495554	-1.01289
METAP1D	1.30354	2.63047	0.495554	-1.01289
ZNF620	0.405786	0.818853	0.495554	-1.01289
FITM2	1.04365	2.10602	0.495554	-1.01289
IL17D	0.537246	1.08413	0.495554	-1.01289
CYP2U1	0.841594	1.69829	0.495554	-1.01289
ANKDD1A	0.321277	0.648319	0.495554	-1.01289
HNF1A	0.317603	0.640905	0.495554	-1.01289
CAPN10-AS1	0.280295	0.565621	0.495554	-1.01289
SSTR1	0.233003	0.470186	0.495554	-1.01289
FOXP2	0.171574	0.346227	0.495554	-1.01289
PAPOLB	1.17432	2.36971	0.495554	-1.01289
FAM13A	2.2407	4.50261	0.497645	-1.00681
TARBP1	5.45707	10.9559	0.498095	-1.00551
UCP2	5.06184	10.1561	0.498402	-1.00462
SMIM10	9.54683	19.1399	0.498793	-1.00349
HOXC13	5.24483	10.4974	0.499632	-1.00106
SEMA3D	0.852084	1.70411	0.500018	-0.999947
BDH1	3.65504	7.30326	0.500467	-0.998653
MCM9	2.275	4.54273	0.500801	-0.997692
GALNT7	32.5766	64.9123	0.501855	-0.994658
LYRM2	23.4373	46.5315	0.503687	-0.989401
FRAT2	4.68545	9.28069	0.50486	-0.986045
NXF1	9.8021	19.4115	0.504963	-0.98575
ABCG2	1.51267	2.99217	0.505543	-0.984095
XXYLT1	24.3738	48.1962	0.505719	-0.983592
ZNF738	0.199036	0.393446	0.505878	-0.983139
KIAA1024	0.69205	1.36802	0.505878	-0.983139
GK	0.521668	1.03121	0.505878	-0.983139
LINC00525	1.96372	3.88181	0.505878	-0.983139
IBA57	0.590308	1.1669	0.505878	-0.983139
TRAFD1	12.8375	25.3611	0.506188	-0.982255
NEK7	60.0888	118.582	0.506728	-0.980716
DNPEP	8.33862	16.4328	0.507438	-0.978698
PAPSS2	48.5641	95.6247	0.507862	-0.977492
PPT2	11.0456	21.7403	0.508068	-0.976907
HOXC11	1.7997	3.53736	0.508769	-0.974918
SLC2A8	9.15352	17.9915	0.508769	-0.974918
NFIB	2.88806	5.66361	0.509932	-0.971622
RANGRF	33.7775	66.2136	0.510129	-0.971066
LZTFL1	6.00321	11.7522	0.510817	-0.969123
ZNF76	2.52177	4.93574	0.51092	-0.968831
GULP1	19.9607	39.0368	0.511331	-0.96767
TXNRD1	143.488	280.351	0.511815	-0.966306
ELOVL6	17.3481	33.8928	0.511852	-0.966201
LY6K	33.1169	64.5549	0.513003	-0.962961
CDKL3	0.692623	1.34945	0.513264	-0.962228
C2orf16	0.214979	0.418322	0.513908	-0.960419
LRRC37A4P	0.184179	0.358389	0.513908	-0.960419
RBKS	2.35736	4.58712	0.513908	-0.960419
TESK1	2.71725	5.28744	0.513908	-0.960419
FAM73B	2.22986	4.33903	0.513908	-0.960419
TSPAN8	1.17972	2.29559	0.513908	-0.960419
CRYM-AS1	0.578596	1.12588	0.513908	-0.960419
MC1R	0.430166	0.83705	0.513908	-0.960419
HEATR1	9.38939	18.2255	0.51518	-0.956852
ECSIT	7.41427	14.3722	0.515876	-0.954903
DUSP10	10.5858	20.5198	0.515884	-0.954881
MSRB1	12.1899	23.6146	0.516202	-0.953993
WARS2	7.48257	14.4831	0.516641	-0.952765
EMC3-AS1	1.70326	3.2968	0.516641	-0.952765
ZFHX4	0.907316	1.7552	0.516931	-0.951957
BLOC1S6	30.7817	59.5317	0.517064	-0.951584
LACTB	34.704	66.7323	0.520047	-0.943286
ABCB10	14.1707	27.2008	0.520967	-0.940737
FAM217B	18.1332	34.7976	0.521107	-0.94035
DNLZ	10.2751	19.7043	0.521465	-0.939357
LARS2	4.75762	9.12058	0.521636	-0.938886
TMEM129	3.87661	7.42901	0.521821	-0.938373
NAT6	1.18391	2.2677	0.522077	-0.937665
ZNF100	1.0438	1.99887	0.522197	-0.937335
ALG11	4.70343	9.007	0.522197	-0.937335
HCG11	1.11501	2.13161	0.523085	-0.934884
FSTL1	35.2855	67.4405	0.523209	-0.93454
CMTM4	13.2762	25.3273	0.524186	-0.93185
NARF	8.80481	16.7822	0.524652	-0.930567
C6orf62	165.018	314.426	0.524822	-0.9301
C8orf33	44.0626	83.9231	0.525036	-0.929513
BOP1	0.702215	1.33606	0.525587	-0.927997
FAM86C1	1.75406	3.33733	0.525587	-0.927997
KLHL4	0.569208	1.08299	0.525587	-0.927997
RPS27	4.74745	9.03266	0.525587	-0.927997
B3GNTL1	1.20489	2.29245	0.525587	-0.927997
ANAPC1	1.7663	3.35318	0.526755	-0.924795
LPIN1	7.54724	14.2508	0.5296	-0.917026
PHOSPHO2	4.8047	9.06603	0.529967	-0.916025
VPS33A	9.85858	18.6022	0.529967	-0.916025
FAM133CP	1.45533	2.74608	0.529967	-0.916025
INPP5B	0.823077	1.55307	0.529967	-0.916025
CDC25B	24.232	45.7069	0.53016	-0.915501
FAN1	4.19553	7.9079	0.530549	-0.914442
TSR1	19.6357	36.9736	0.531074	-0.913016
EMP3	27.3371	51.4562	0.531269	-0.912484
ASB9	3.47672	6.54418	0.531269	-0.912484
GTF2I	11.6617	21.8735	0.533142	-0.907409
CINP	32.3399	60.6478	0.533242	-0.907139
PDF	3.33828	6.25528	0.533673	-0.905971
SNX21	0.682467	1.27881	0.533673	-0.905971
GSDMD	1.17091	2.19405	0.533673	-0.905971
C6orf226	3.62251	6.78789	0.533673	-0.905971
HOXD9	1.06081	1.98775	0.533673	-0.905971
LOC100506603	3.12442	5.85455	0.533673	-0.905971
FGD3	0.722153	1.35317	0.533673	-0.905971
PDK2	3.14149	5.88232	0.534056	-0.904937
CYHR1	2.79389	5.22613	0.534601	-0.903467
LYSMD2	12.2121	22.8263	0.535001	-0.902387
SLC27A2	8.51096	15.8833	0.535843	-0.900118
TOMM22	73.9529	137.946	0.536099	-0.899428
MYO9A	1.99242	3.71132	0.53685	-0.897409
BDNF-AS	0.258781	0.48198	0.536912	-0.897244
TPCN1	2.91676	5.42888	0.537267	-0.896289
GXYLT1	8.65289	16.0969	0.53755	-0.895529
MRM1	3.63635	6.76139	0.53781	-0.894831
ATP8B1	1.54478	2.86987	0.538274	-0.893587
ZNF408	2.00203	3.71765	0.53852	-0.892928
MOCOS	4.1552	7.71557	0.538547	-0.892856
HS6ST2	19.4852	36.1657	0.538774	-0.892247
GBE1	10.324	19.1591	0.538855	-0.892032
NIPAL2	1.03455	1.91723	0.539603	-0.89003
LINC01311	2.07001	3.83617	0.539603	-0.89003
PRDM13	1.45624	2.69873	0.539603	-0.89003
LOC101928470	4.12903	7.65197	0.539603	-0.89003
FA2H	0.961228	1.78136	0.539603	-0.89003
KIF4B	1.05418	1.95362	0.539603	-0.89003
SPEF2	0.782327	1.44975	0.539627	-0.889964
TRMT10A	10.5651	19.5774	0.539656	-0.889888
ZNF124	7.88835	14.6121	0.539852	-0.889364
GTPBP8	33.645	62.3187	0.539886	-0.889272
METTL3	26.7031	49.4099	0.540441	-0.887791
DMPK	0.817128	1.51089	0.540826	-0.886764
C21orf58	0.634078	1.17208	0.540983	-0.886345
ZNF254	3.3722	6.22684	0.541559	-0.884811
TRMT61A	8.12355	14.9403	0.543733	-0.879031
CDAN1	1.12734	2.0718	0.544138	-0.877957
IDNK	2.69503	4.95285	0.544138	-0.877957
TRIM66	0.273369	0.50239	0.544138	-0.877957
MCTP2	2.19052	4.02471	0.544267	-0.877613
CHN1	2.97154	5.4547	0.544767	-0.876289
ADARB1	4.95701	9.09888	0.544794	-0.876218
ZNF573	1.03638	1.89978	0.545527	-0.874276
PTPN4	1.96214	3.59647	0.545575	-0.874152
C1orf131	51.3084	93.9905	0.545889	-0.87332
PRKAR1B	14.2963	26.1683	0.546322	-0.872178
CLOCK	11.6847	21.3392	0.547568	-0.868891
ZSCAN22	0.646014	1.17947	0.547717	-0.868496
LOC101928062	5.10109	9.31337	0.547717	-0.868496
LINC00857	2.77598	5.06826	0.547717	-0.868496
COQ7	6.21905	11.3536	0.54776	-0.868384
KDELC2	21.8006	39.7804	0.548024	-0.867688
TNFRSF19	2.00523	3.65712	0.548307	-0.866944
TRMT1	6.9358	12.6486	0.548346	-0.866842
RBM47	15.5963	28.4244	0.548695	-0.865923
MPP5	37.2575	67.8742	0.548919	-0.865334
PPP2R4	19.1191	34.7697	0.549877	-0.862818
IPO4	16.4717	29.9475	0.55002	-0.862444
LOC90246	1.21101	2.19938	0.550615	-0.860883
PINK1	3.31613	6.02259	0.550615	-0.860883
INHBA	6.12913	11.1314	0.550615	-0.860883
FUNDC2	5.73443	10.4049	0.55113	-0.859536
MIER3	4.10101	7.42589	0.552259	-0.856583
B4GALT2	15.4236	27.9264	0.552296	-0.856486
CISD1	49.801	90.1042	0.552704	-0.855421
BMP4	2.21279	4.00136	0.553009	-0.854624
CREM	12.7906	23.1207	0.553212	-0.854096
ARL5A	53.5021	96.6031	0.553834	-0.852474
ACACA	5.77194	10.4207	0.553892	-0.852324
PLAGL1	41.7734	75.3997	0.554025	-0.851976
LIMCH1	2.8376	5.11472	0.55479	-0.849986
ZNF689	7.87537	14.1898	0.555003	-0.849432
C1orf198	8.55453	15.4036	0.555358	-0.848511
BRF1	4.80021	8.64076	0.555531	-0.848061
H19	60.7159	109.133	0.556346	-0.845946
ICA1L	0.552181	0.991823	0.556733	-0.844942
WBP11P1	1.45778	2.61846	0.556733	-0.844942
FAM86DP	1.86185	3.33539	0.55821	-0.84112
PDIK1L	3.56687	6.38493	0.558638	-0.840013
E2F5	16.2956	29.1642	0.558754	-0.839715
NADK2	25.3128	45.2669	0.559191	-0.838588
HEATR5A	5.77903	10.3265	0.559629	-0.837457
GTF3C6	102.788	183.553	0.559989	-0.836528
FBXL13	0.127913	0.228414	0.560007	-0.836484
BRPF3	2.60066	4.64183	0.560265	-0.835818
EID1	175.641	312.76	0.561584	-0.832426
CCP110	13.5292	24.0893	0.561628	-0.832314
PSMB10	16.8955	30.083	0.561628	-0.832314
CHD3	6.97903	12.4241	0.561732	-0.832046
FOPNL	40.7332	72.5044	0.561803	-0.831864
ATRNL1	0.19055	0.33915	0.561844	-0.831758
PDE10A	1.46404	2.60263	0.562521	-0.830022
CYB561A3	6.55138	11.6465	0.562521	-0.830022
WDR13	6.65823	11.8364	0.562521	-0.830022
LINC00346	0.94889	1.68685	0.562521	-0.830022
MIR31HG	2.79278	4.96475	0.562521	-0.830022
ADAM12	2.28325	4.05697	0.562797	-0.829313
LPL	6.58182	11.692	0.562932	-0.828968
CSNK1G1	8.32872	14.7943	0.562968	-0.828875
SHPRH	2.27939	4.04634	0.563322	-0.827969
USPL1	8.36593	14.8394	0.563764	-0.826836
MTHFR	1.07161	1.89987	0.564045	-0.826118
PYCRL	5.10236	9.04064	0.564381	-0.825259
ARHGEF17	0.895776	1.58628	0.564701	-0.824441
CIPC	11.4974	20.3507	0.564964	-0.82377
DCPS	10.5908	18.7083	0.566101	-0.820868
PITPNM1	1.89404	3.3443	0.566347	-0.820241
VIPR1	0.598969	1.05722	0.56655	-0.819725
ZYG11A	1.95078	3.44168	0.56681	-0.819063
THRB	0.443652	0.782563	0.566922	-0.818779
UBE3A	33.0649	58.2975	0.567176	-0.818133
NUS1	12.1328	21.3455	0.568402	-0.815016
ALG14	18.918	33.2671	0.568668	-0.814341
RNF139-AS1	0.928332	1.63221	0.568757	-0.814116
CPT2	7.34176	12.8912	0.569517	-0.812189
NHEJ1	5.5466	9.73082	0.570003	-0.810958
CLDN4	6.37056	11.1764	0.570003	-0.810958
PPP1R7	18.6287	32.66	0.570382	-0.81
ZNF607	0.866516	1.51905	0.570431	-0.809875
BRD3	8.63556	15.1349	0.570572	-0.809519
C10orf32	10.2795	18.014	0.570638	-0.809353
ZNF75D	1.56151	2.73534	0.570866	-0.808775
POGLUT1	7.92604	13.8726	0.571344	-0.807567
MED11	20.2516	35.4093	0.57193	-0.806091
RNF138	22.0996	38.6335	0.572032	-0.805831
INTS7	9.72885	16.9985	0.572334	-0.80507
HEG1	5.49628	9.60117	0.572459	-0.804755
QTRT1	12.9911	22.6863	0.57264	-0.8043
MYBBP1A	4.90938	8.57324	0.57264	-0.8043
JADE1	8.01803	13.9925	0.573026	-0.803329
RMND5A	12.0739	21.0702	0.57303	-0.803318
STARD7	57.1033	99.5489	0.573621	-0.801831
DNAJC11	11.3817	19.8404	0.573664	-0.801721
NFATC3	11.5064	20.0562	0.57371	-0.801606
LRRC58	69.1441	120.459	0.574005	-0.800865
SNHG10	20.297	35.3237	0.574599	-0.799372
ERI3	16.2525	28.2767	0.574765	-0.798955
MTHFSD	2.78798	4.84969	0.574879	-0.79867
DCAF11	5.51554	9.594	0.574894	-0.798631
RBM38	15.3517	26.6851	0.57529	-0.797638
USP13	8.90628	15.4776	0.575432	-0.797283
CASC4	19.2087	33.3757	0.57553	-0.797037
CMTM7	1.59715	2.77344	0.575873	-0.796178
TP53	25.3236	43.8678	0.577271	-0.792679
SETD7	16.2073	28.0743	0.5773	-0.792608
SLC30A4	0.0790679	0.136761	0.578146	-0.790494
LOC100130238	0.171922	0.297368	0.578146	-0.790494
MPPE1	0.846562	1.46427	0.578146	-0.790494
PLEKHG4B	0.0289424	0.0500606	0.578146	-0.790494
GPR98	0.0173128	0.0299454	0.578146	-0.790494
NRXN3	0.0442741	0.0765795	0.578146	-0.790494
ANKRD24	0.0827798	0.143181	0.578146	-0.790494
PPM1E	0.109954	0.190184	0.578146	-0.790494
APBA1	0.0506184	0.0875529	0.578146	-0.790494
LOC101928068	0.0705635	0.122051	0.578146	-0.790494
NKAIN1	0.114056	0.197279	0.578146	-0.790494
LOC100289230	0.17765	0.307275	0.578146	-0.790494
STX1B	0.0733432	0.126859	0.578146	-0.790494
LOC641367	0.123709	0.213975	0.578146	-0.790494
KIAA1328	0.139619	0.241495	0.578146	-0.790494
CNTD2	0.183418	0.317253	0.578146	-0.790494
PPP5D1	0.268551	0.464503	0.578146	-0.790494
CDH19	0.0567657	0.0981857	0.578146	-0.790494
CCDC39	0.172948	0.299143	0.578146	-0.790494
GPR135	0.183116	0.31673	0.578146	-0.790494
ANKRD55	0.133309	0.230579	0.578146	-0.790494
HOXB8	0.182815	0.316209	0.578146	-0.790494
CCR6	0.110353	0.190875	0.578146	-0.790494
IL22RA1	0.112516	0.194615	0.578146	-0.790494
SLC9B1	0.275254	0.476098	0.578146	-0.790494
ERV3-1	0.25795	0.446167	0.578146	-0.790494
SLC9A3	0.12119	0.209618	0.578146	-0.790494
ANKRD20A5P	0.0899032	0.155503	0.578146	-0.790494
KCNMB2	0.14545	0.25158	0.578146	-0.790494
STAG3L2	0.176896	0.30597	0.578146	-0.790494
PRR7-AS1	0.208295	0.36028	0.578146	-0.790494
ZC3H12B	0.0918609	0.158889	0.578146	-0.790494
GHDC	0.151672	0.262342	0.578146	-0.790494
RHBDL1	0.269201	0.465629	0.578146	-0.790494
CAMK2B	0.0863759	0.149402	0.578146	-0.790494
ESRRB	0.110574	0.191257	0.578146	-0.790494
LOC100506023	0.237246	0.410356	0.578146	-0.790494
MYLK2	0.238648	0.412781	0.578146	-0.790494
GJA3	0.768349	1.32899	0.578146	-0.790494
WASH1	0.182915	0.316382	0.578146	-0.790494
XKR3	0.198258	0.34292	0.578146	-0.790494
WTH3DI	0.181768	0.314398	0.578146	-0.790494
ARNTL2-AS1	0.450367	0.778984	0.578146	-0.790494
LOC101926943	0.677381	1.17164	0.578146	-0.790494
KNDC1	0.0984117	0.170219	0.578146	-0.790494
ZNF324B	0.667655	1.15482	0.578146	-0.790494
FIRRE	0.341467	0.590623	0.578146	-0.790494
CECR7	0.36677	0.634389	0.578146	-0.790494
ARIH2OS	0.230319	0.398375	0.578146	-0.790494
CASC11	0.382192	0.661064	0.578146	-0.790494
LOC100270804	0.208295	0.36028	0.578146	-0.790494
NLGN3	0.086228	0.149146	0.578146	-0.790494
PRPS1L1	0.613195	1.06062	0.578146	-0.790494
TESK2	0.223672	0.386878	0.578146	-0.790494
GABRE	0.740133	1.28018	0.578146	-0.790494
PSMC1	0.420266	0.726921	0.578146	-0.790494
RBM12B-AS1	0.470058	0.813044	0.578146	-0.790494
RAD21-AS1	0.380013	0.657296	0.578146	-0.790494
LOC102724009	0.66922	1.15753	0.578146	-0.790494
NOXO1	0.205977	0.356272	0.578146	-0.790494
KANTR	0.412635	0.71372	0.578146	-0.790494
CHRM3	1.57833	2.72999	0.578146	-0.790494
REC8	0.152109	0.263098	0.578146	-0.790494
TMEM145	0.187336	0.324029	0.578146	-0.790494
PMCH	1.058	1.82999	0.578146	-0.790494
RAB20	1.76685	3.05605	0.578146	-0.790494
LRRN2	0.216382	0.374268	0.578146	-0.790494
C1orf192	0.433947	0.750584	0.578146	-0.790494
PRSS8	0.343579	0.594277	0.578146	-0.790494
BMI1	1.36867	2.36734	0.578146	-0.790494
SNORA63	2.46868	4.26999	0.578146	-0.790494
CCDC183	0.27475	0.475225	0.578146	-0.790494
SNORA64	2.4871	4.30185	0.578146	-0.790494
LINC00618	0.923189	1.59681	0.578146	-0.790494
ABHD14A	2.77264	4.79574	0.578146	-0.790494
LOC100506127	0.0622007	0.107586	0.578146	-0.790494
IFT172	0.36948	0.639078	0.578146	-0.790494
DMBX1	0.116163	0.200923	0.578146	-0.790494
RPL31P11	1.29175	2.2343	0.578146	-0.790494
SNORA13	2.5058	4.3342	0.578146	-0.790494
OGFOD2	2.72385	4.71136	0.578146	-0.790494
SPRYD4	9.03787	15.6325	0.578146	-0.790494
MOB4	6.40904	11.0855	0.578146	-0.790494
ZNF341	0.709669	1.22749	0.578146	-0.790494
CBX3P2	0.23322	0.403393	0.578146	-0.790494
FAHD1	29.8836	51.6886	0.578146	-0.790494
PEX10	2.67786	4.6318	0.578146	-0.790494
LINC01315	4.19209	7.25092	0.578146	-0.790494
SNORD47	21.641	37.4317	0.578146	-0.790494
PRKAR2A	5.03896	8.71572	0.578146	-0.790494
MRPL55	34.019	58.8416	0.578146	-0.790494
TMEM254	2.77871	4.80624	0.578146	-0.790494
GCNT2	3.90696	6.75774	0.578146	-0.790494
MIR5088	4.21862	7.29681	0.578146	-0.790494
MIS18A	42.4279	73.3862	0.578146	-0.790494
MCM5	20.6822	35.7733	0.578146	-0.790494
BRF2	6.33797	10.9626	0.578146	-0.790494
PGP	15.5158	26.8372	0.578146	-0.790494
LOC100506675	3.24352	5.6102	0.578146	-0.790494
ZBTB45	1.13358	1.96071	0.578146	-0.790494
SNORD57	4.62877	8.00623	0.578146	-0.790494
MSR1	0.112592	0.194746	0.578146	-0.790494
DGAT2	2.29348	3.96696	0.578146	-0.790494
SNORD25	4.9742	8.60371	0.578146	-0.790494
TCEA2	6.76988	11.7096	0.578146	-0.790494
STOX1	1.30439	2.25616	0.578146	-0.790494
IGBP1P1	1.1592	2.00504	0.578146	-0.790494
IPCEF1	0.200376	0.346584	0.578146	-0.790494
MIR6856	4.97392	8.60323	0.578146	-0.790494
TBX19	0.94478	1.63416	0.578146	-0.790494
AGR2	1.35614	2.34567	0.578146	-0.790494
C19orf44	1.28552	2.22352	0.578146	-0.790494
CCDC97	2.60838	4.51164	0.578146	-0.790494
LOC100128361	0.41555	0.718763	0.578146	-0.790494
PRKG1	0.129316	0.223673	0.578146	-0.790494
NAA11	0.219836	0.380243	0.578146	-0.790494
ELMOD3	1.02239	1.76839	0.578146	-0.790494
FAM149A	0.138574	0.239687	0.578146	-0.790494
HIST1H2AK	0.724503	1.25315	0.578146	-0.790494
INO80B	3.33271	5.76448	0.578146	-0.790494
C5orf56	0.828003	1.43217	0.578146	-0.790494
SAA1	1.88644	3.26291	0.578146	-0.790494
KMT2B	1.02291	1.76929	0.578146	-0.790494
MX1	0.504702	0.872966	0.578146	-0.790494
AGAP6	0.841594	1.45568	0.578146	-0.790494
FICD	0.605581	1.04745	0.578146	-0.790494
LOC100507291	1.10355	1.90877	0.578146	-0.790494
CATSPER3	0.243798	0.421689	0.578146	-0.790494
PRDM11	0.279174	0.482877	0.578146	-0.790494
HIST1H2BO	0.713643	1.23436	0.578146	-0.790494
PAX6	0.0990743	0.171366	0.578146	-0.790494
EXOC3L4	0.5169	0.894065	0.578146	-0.790494
ALG1L	0.644625	1.11499	0.578146	-0.790494
KANK4	0.182548	0.315747	0.578146	-0.790494
CCDC134	1.30695	2.26058	0.578146	-0.790494
MRGPRF	0.586745	1.01487	0.578146	-0.790494
FAM222A-AS1	0.825951	1.42862	0.578146	-0.790494
BLNK	0.274287	0.474425	0.578146	-0.790494
LINC01239	0.141999	0.245611	0.578146	-0.790494
PLXNC1	0.454901	0.786827	0.578146	-0.790494
LOC729739	0.680146	1.17643	0.578146	-0.790494
MAPK8IP1	0.103985	0.179859	0.578146	-0.790494
RHPN1-AS1	0.16556	0.286363	0.578146	-0.790494
BMF	0.0776507	0.13431	0.578146	-0.790494
LOC100288842	0.571649	0.988762	0.578146	-0.790494
ZNF852	0.338347	0.585227	0.578146	-0.790494
IFITM10	0.0898548	0.155419	0.578146	-0.790494
EYA2	0.405604	0.70156	0.578146	-0.790494
LOC100288778	0.272949	0.472112	0.578146	-0.790494
C6orf118	0.181224	0.313457	0.578146	-0.790494
SYT12	0.294235	0.508928	0.578146	-0.790494
PRR34	0.189251	0.327341	0.578146	-0.790494
MYRF	0.468692	0.81068	0.578146	-0.790494
IL20RA	0.225284	0.389665	0.578146	-0.790494
TPTE2P5	0.087703	0.151697	0.578146	-0.790494
NRTN	0.301876	0.522145	0.578146	-0.790494
LINC01024	0.304166	0.526105	0.578146	-0.790494
LOC100507283	0.114605	0.198228	0.578146	-0.790494
ADHFE1	0.175869	0.304194	0.578146	-0.790494
MYT1L	0.0467028	0.0807803	0.578146	-0.790494
HESX1	0.284119	0.491431	0.578146	-0.790494
FAM151B	0.195467	0.338093	0.578146	-0.790494
ASTN2	0.211888	0.366495	0.578146	-0.790494
CMAHP	0.135037	0.233569	0.578146	-0.790494
PIK3C2G	0.0671918	0.116219	0.578146	-0.790494
CILP2	0.0793692	0.137282	0.578146	-0.790494
UCP3	0.137431	0.237711	0.578146	-0.790494
CTSF	0.165477	0.286221	0.578146	-0.790494
JAK3	0.0613308	0.106082	0.578146	-0.790494
PNMA2	0.0687725	0.118953	0.578146	-0.790494
ZMIZ1-AS1	0.160253	0.277185	0.578146	-0.790494
DGKG	0.058193	0.100654	0.578146	-0.790494
N4BP2L2-IT2	0.0681536	0.117883	0.578146	-0.790494
DNHD1	0.0896855	0.155126	0.578146	-0.790494
FOXD2	0.071288	0.123304	0.578146	-0.790494
RNF157	0.0730698	0.126386	0.578146	-0.790494
SYCP2	0.0608159	0.105191	0.578146	-0.790494
SULF1	0.0600056	0.10379	0.578146	-0.790494
APC2	0.0329743	0.0570346	0.578146	-0.790494
RYR3	0.0214405	0.0370849	0.578146	-0.790494
MTHFS	1.61001	2.78477	0.578146	-0.790494
MIATNB	0.216832	0.375048	0.578146	-0.790494
RPS26P11	0.602661	1.0424	0.578146	-0.790494
LOC100129534	0.148252	0.256427	0.578146	-0.790494
PRH1	3.47157	6.00465	0.578147	-0.790493
SCG5	0.268551	0.463383	0.579544	-0.787011
CCDC34	41.1418	70.8819	0.580428	-0.784811
GOSR1	14.2675	24.5674	0.58075	-0.78401
AXL	44.9545	77.3284	0.581345	-0.782533
EIF1AX	87.699	150.844	0.581387	-0.782429
TUBD1	9.70679	16.6886	0.581642	-0.781797
MYLIP	7.48802	12.8579	0.582366	-0.780002
DHTKD1	4.15232	7.12688	0.582628	-0.779353
STAG1	12.1283	20.8106	0.582796	-0.778937
FAM216A	80.7613	138.556	0.582877	-0.778736
HDAC11	0.979205	1.67917	0.583149	-0.778062
FAM20B	12.6672	21.7162	0.583308	-0.77767
PEX26	4.38412	7.51536	0.583355	-0.777555
KANK1	0.996064	1.70703	0.583506	-0.77718
ZMYND11	17.7335	30.378	0.583762	-0.776547
GTF3A	300.269	513.96	0.584227	-0.7754
FENDRR	1.73008	2.95875	0.584735	-0.774146
DUSP9	5.18111	8.84049	0.586066	-0.770865
SUSD5	2.39716	4.08869	0.586289	-0.770316
SCARA3	6.51673	11.113	0.586405	-0.77003
PEG10	17.7191	30.1666	0.587376	-0.767643
MRPL46	51.9903	88.4848	0.587562	-0.767187
GLTSCR1L	1.58579	2.69864	0.587624	-0.767035
SEPHS1	20.1814	34.3285	0.58789	-0.766381
DPP8	14.4862	24.6183	0.588435	-0.765046
HAGHL	4.03237	6.85235	0.588466	-0.764969
ZADH2	3.3964	5.76973	0.588658	-0.764499
WNK2	0.127935	0.217225	0.588951	-0.76378
PET117	38.9538	66.1293	0.589055	-0.763527
PHLPP2	2.12428	3.60497	0.589264	-0.763013
PEMT	18.593	31.553	0.589264	-0.763013
ZNF83	3.77004	6.39632	0.589407	-0.762664
OLR1	53.6773	91.0584	0.589482	-0.76248
BIRC5	74.2292	125.872	0.589719	-0.7619
LRFN4	6.5916	11.1732	0.589945	-0.761348
ZEB2	0.223472	0.378602	0.590256	-0.760586
OIP5	32.3564	54.7999	0.590447	-0.76012
C12orf65	56.1361	95.0648	0.590504	-0.759982
GFER	6.50218	11.0073	0.590715	-0.759467
ZNF138	4.89385	8.28416	0.590748	-0.759385
HPGD	1.57146	2.65994	0.590789	-0.759284
PBX1	2.2578	3.82035	0.590994	-0.758785
TATDN2	7.61802	12.8799	0.591467	-0.757629
NRDE2	3.65684	6.18137	0.591591	-0.757327
THUMPD1	39.8747	67.4025	0.591591	-0.757327
KDM1A	57.3205	96.8661	0.59175	-0.756941
TSEN54	7.38314	12.4734	0.591912	-0.756547
HOXA10	36.5744	61.7834	0.591977	-0.756386
SKP2	47.8879	80.8833	0.592062	-0.75618
ZNF428	11.7724	19.8775	0.592247	-0.755729
ZBED6CL	2.43518	4.11176	0.592247	-0.755728
IDH3A	43.269	73.0024	0.592707	-0.754609
SMEK2	14.3818	24.2627	0.592753	-0.754498
ADAT1	7.61494	12.8461	0.592783	-0.754425
FAM120C	1.75384	2.95859	0.592796	-0.754392
ING5	1.28231	2.16251	0.59297	-0.753968
GOLPH3L	6.20089	10.4528	0.593228	-0.753341
EPS8L2	6.26011	10.5526	0.593228	-0.753341
BIRC2	21.5199	36.2539	0.593588	-0.752466
UBE4B	8.92041	15.0095	0.594318	-0.750693
TSGA10	0.63308	1.06432	0.594822	-0.749471
ZNF318	3.53835	5.94017	0.595666	-0.747425
SUOX	2.54406	4.27095	0.595666	-0.747425
HDGFRP3	89.6848	150.507	0.595886	-0.746891
KEAP1	18.1761	30.5001	0.595935	-0.746773
ARSB	2.74478	4.60513	0.596027	-0.746551
CCNG1	74.7327	125.368	0.596108	-0.746354
CNDP2	7.48924	12.5556	0.596485	-0.745443
DPH2	11.9485	20.031	0.5965	-0.745406
SLC25A15	10.1818	17.0607	0.596796	-0.74469
C12orf76	5.48031	9.18289	0.596796	-0.74469
TREX1	3.57396	5.98857	0.596796	-0.74469
IPO11	4.10758	6.88273	0.596796	-0.74469
DEPDC1	24.8536	41.6058	0.597359	-0.743329
C9orf3	4.34	7.26075	0.597735	-0.742422
ZNF213	1.55847	2.60579	0.598082	-0.741584
RBFA	1.81923	3.0399	0.59845	-0.740697
ADD3	14.9732	25.0126	0.598625	-0.740275
KIAA1244	0.918164	1.53002	0.600101	-0.736723
ZNF367	14.584	24.2912	0.600383	-0.736046
PTPLA	17.0843	28.4475	0.600555	-0.735632
TFDP1	135.144	225.02	0.600586	-0.735558
IREB2	29.6264	49.2973	0.600975	-0.734624
TPI1P2	2.14801	3.57244	0.601272	-0.73391
B4GALNT4	2.5087	4.17232	0.601272	-0.73391
MGC72080	6.20706	10.3232	0.601272	-0.73391
DUS1L	32.195	53.5448	0.601272	-0.73391
QPCTL	1.87474	3.11796	0.601272	-0.73391
SH2D4A	11.0104	18.3119	0.601272	-0.73391
UNC119B	10.9295	18.1721	0.601441	-0.733504
SCCPDH	12.119	20.1466	0.601539	-0.733269
VPS54	8.76151	14.5641	0.601582	-0.733167
ERCC2	5.19455	8.63017	0.601906	-0.732391
TFPI	6.46963	10.7486	0.601906	-0.732391
LIG1	5.39221	8.95577	0.602094	-0.73194
KIF26A	1.23306	2.04747	0.602236	-0.7316
DPP3	8.99437	14.935	0.602236	-0.7316
C2orf68	3.90705	6.48758	0.602236	-0.7316
PMS2	4.35572	7.22851	0.602575	-0.730788
POLE	3.99676	6.62501	0.603283	-0.729093
RASSF7	4.62609	7.6682	0.603283	-0.729093
ZBTB34	1.82809	3.03024	0.603283	-0.729093
YDJC	23.9118	39.6362	0.603283	-0.729093
MBD3	11.6499	19.3109	0.603283	-0.729093
OPN3	3.66904	6.08179	0.603283	-0.729093
C20orf27	36.5922	60.5863	0.603969	-0.727455
CNOT1	23.1779	38.3738	0.604002	-0.727375
PARVA	6.45978	10.6774	0.604995	-0.725005
ZFYVE26	1.5501	2.56199	0.605037	-0.724906
YWHAB	508.537	840.347	0.605152	-0.724631
CHST14	10.1589	16.7847	0.605247	-0.724405
SRM	146.084	241.357	0.605264	-0.724364
ZNF668	4.09217	6.76013	0.605339	-0.724184
DCXR	30.776	50.7807	0.606057	-0.722475
USP45	4.43596	7.31167	0.606697	-0.720953
FEM1A	7.36942	12.1468	0.606697	-0.720953
FZD2	11.0829	18.264	0.606815	-0.720672
UNC93B1	3.01538	4.96724	0.607053	-0.720105
SPIDR	9.55653	15.7407	0.607124	-0.719937
MKNK2	21.801	35.9051	0.607185	-0.719791
EXOC7	5.25155	8.64822	0.60724	-0.71966
RNF165	1.26838	2.08804	0.607447	-0.71917
NFX1	10.4445	17.192	0.60752	-0.718995
PHLPP1	1.61151	2.65251	0.607543	-0.718941
CSE1L	179.26	295.008	0.607644	-0.718701
DDX49	15.4834	25.4748	0.607795	-0.718344
SNHG4	4.32473	7.10864	0.608376	-0.716964
TARBP2	10.4221	17.1276	0.6085	-0.716672
SYNM	1.03855	1.70653	0.608575	-0.716493
TAF1L	0.536151	0.880994	0.608575	-0.716493
ORAI2	2.33696	3.83752	0.608978	-0.715539
CENPBD1P1	6.88289	11.3012	0.609039	-0.715392
MAPK12	11.0204	18.0756	0.609681	-0.713873
TPD52	43.1957	70.8347	0.609809	-0.71357
2015-03-01	17.087	28.0129	0.609971	-0.713188
UNG	56.3651	92.3932	0.610057	-0.712983
TTC27	20.2134	33.128	0.610161	-0.712739
POP4	18.7026	30.6466	0.610265	-0.712491
EHMT2	9.69111	15.8724	0.610566	-0.711782
NLRX1	1.28676	2.107	0.610707	-0.711448
MDK	1.8899	3.09419	0.61079	-0.711252
ZBTB40	1.0721	1.75504	0.610871	-0.711059
LRP8	4.75359	7.78106	0.610918	-0.710949
TOB2	4.74537	7.76595	0.611049	-0.710641
ANKRD49	12.946	21.1818	0.611183	-0.710324
HR	2.77927	4.54596	0.611373	-0.709875
NRP2	3.23368	5.28731	0.611593	-0.709357
CAPNS1	84.2781	137.677	0.612145	-0.708055
CEP192	1.50423	2.45728	0.612155	-0.708032
LINC00707	1.95403	3.19206	0.612155	-0.708032
ATM	2.50961	4.09964	0.612155	-0.708032
FAM120A	136.27	222.601	0.612173	-0.707989
NMT1	21.9042	35.7625	0.612491	-0.707238
GTSE1	19.0624	31.1193	0.61256	-0.707078
ARMC6	12.3226	20.103	0.612974	-0.706102
GCDH	4.20775	6.86005	0.61337	-0.705171
PTRHD1	28.9508	47.164	0.613834	-0.704079
FAM46A	6.05732	9.86084	0.61428	-0.703031
WIPI2	18.473	30.0534	0.614674	-0.702107
TRIM28	67.4652	109.679	0.615115	-0.701073
ZNF106	15.3158	24.8898	0.615345	-0.700532
ST6GAL1	0.400889	0.651401	0.615426	-0.700343
CCSAP	4.81587	7.82331	0.61558	-0.699982
LOC101928099	0.661253	1.07413	0.615619	-0.699891
PGM2L1	2.23462	3.62781	0.615969	-0.699071
PPP1R3D	3.19015	5.17303	0.616689	-0.697384
DUS3L	13.4752	21.8509	0.616689	-0.697384
METTL12	1.92921	3.12834	0.616689	-0.697384
TDRP	3.2422	5.25743	0.616689	-0.697384
COL9A3	1.09269	1.77187	0.616689	-0.697384
ANKRD33B	8.85581	14.3602	0.616689	-0.697384
LINC00839	1.15619	1.87483	0.616689	-0.697384
GNE	0.976092	1.58257	0.616778	-0.697176
DDX21	237.394	384.593	0.61726	-0.696051
THAP4	11.6675	18.8872	0.617745	-0.694916
NPHP3	7.3638	11.9152	0.618018	-0.694279
FBXO21	34.2608	55.4277	0.618117	-0.694049
DNAJC30	3.02496	4.89094	0.618482	-0.693197
PPP1R3E	1.70528	2.75721	0.618482	-0.693197
LOC646762	1.41477	2.28749	0.618482	-0.693197
PGM1	10.2462	16.5566	0.618861	-0.692314
LOC440434	3.02607	4.88515	0.619442	-0.690958
STEAP3	3.87625	6.25764	0.619442	-0.690958
CPNE1	93.1549	150.364	0.619529	-0.690756
TDP1	11.9161	19.2204	0.619969	-0.689731
CSNK2A3	8.70836	14.0448	0.620041	-0.689565
MITF	8.21139	13.2418	0.620113	-0.689398
MAST2	2.55558	4.11892	0.62045	-0.688614
TTC32	8.95234	14.4288	0.62045	-0.688614
INVS	2.01119	3.24135	0.62048	-0.688543
ZDHHC2	18.7735	30.2449	0.620717	-0.687991
FASTKD2	9.68899	15.5925	0.621387	-0.686436
ICK	2.33894	3.76333	0.621507	-0.686157
XPNPEP3	5.98057	9.62126	0.6216	-0.685942
SMCR8	2.05393	3.30394	0.621663	-0.685797
SPG21	125.429	201.741	0.62173	-0.685639
SORD	6.7531	10.8609	0.62178	-0.685524
ATG14	4.00516	6.44144	0.62178	-0.685524
RBM19	5.81901	9.35638	0.621929	-0.685178
ERCC6L2	4.64921	7.47156	0.622254	-0.684424
TSTD2	2.79278	4.48553	0.622619	-0.683579
TRMT2B	1.51767	2.43756	0.622619	-0.683579
MED25	3.98957	6.40772	0.622619	-0.683579
ATAD3B	3.83543	6.16015	0.622619	-0.683579
GBA2	3.36347	5.40212	0.622619	-0.683579
NOL4L	2.42974	3.90245	0.622619	-0.683579
DHRS4L2	2.16099	3.47081	0.622619	-0.683579
HOXD13	5.01268	8.05095	0.622619	-0.683579
LOC644762	4.33624	6.96452	0.622619	-0.683579
RAB40C	2.83167	4.54799	0.622619	-0.683579
LINC01270	1.91065	3.06873	0.622619	-0.683579
KBTBD4	2.14362	3.44291	0.622619	-0.683579
DNASE1	0.767654	1.23294	0.622619	-0.683579
DOPEY2	0.303802	0.487943	0.622619	-0.683579
B9D2	2.58923	4.15862	0.622619	-0.683579
RNASEH1-AS1	25.7484	41.3323	0.622959	-0.68279
TRHDE-AS1	0.414002	0.664137	0.623368	-0.681844
FANCI	22.7121	36.4285	0.623469	-0.68161
PTPN2	12.9752	20.8085	0.623552	-0.681418
FBXL14	4.26259	6.82672	0.624398	-0.679463
RNF135	9.04354	14.4836	0.624398	-0.679463
METRN	39.0648	62.5541	0.624495	-0.679237
CIZ1	29.7633	47.6569	0.624533	-0.679151
PSPH	26.2778	42.0497	0.624922	-0.678253
LMO4	10.2953	16.4745	0.624922	-0.678253
RTF1	21.1738	33.8682	0.625182	-0.677652
LMAN2L	8.00433	12.7984	0.625419	-0.677105
IBTK	18.6978	29.8955	0.62544	-0.677056
MBLAC2	7.70885	12.3236	0.625535	-0.676837
FOXO3B	0.604426	0.965036	0.626325	-0.675017
NUDT16L1	6.41856	10.248	0.626325	-0.675017
NKX3-1	3.53657	5.64654	0.626325	-0.675017
ITFG2	8.18363	13.0567	0.626775	-0.67398
ZNF717	0.833873	1.3293	0.6273	-0.672772
DNAJA1	173.353	276.23	0.627567	-0.672159
NECAB3	3.26905	5.20797	0.627701	-0.671849
UFC1	33.8618	53.9457	0.627702	-0.671849
MBTPS1	24.4247	38.8905	0.628037	-0.671079
SESTD1	3.60448	5.738	0.628178	-0.670755
TTC39C	3.7088	5.90358	0.628228	-0.67064
INTS1	4.49204	7.14981	0.628274	-0.670533
ABHD15	2.48339	3.95181	0.62842	-0.6702
TTLL12	13.4964	21.4698	0.628619	-0.669742
TMEM222	6.40112	10.1789	0.628861	-0.669188
FERMT2	39.9726	63.5217	0.629275	-0.668238
RPGRIP1L	3.08481	4.89913	0.629664	-0.667346
ZAK	29.6885	47.1383	0.629816	-0.666997
RECQL5	0.978709	1.55377	0.629893	-0.66682
PKP4	20.3205	32.2403	0.630284	-0.665927
JMJD7	2.94063	4.66245	0.630705	-0.664963
BCL2	0.308014	0.488365	0.630705	-0.664963
HSPA1L	1.57637	2.49938	0.630705	-0.664963
MXD4	1.62439	2.57552	0.630705	-0.664963
TECPR1	0.348064	0.551865	0.630705	-0.664963
ZNF749	0.6827	1.08244	0.630705	-0.664963
EBI3	1.75869	2.78845	0.630705	-0.664963
TMEM170B	0.950732	1.50741	0.630705	-0.664963
CEBPA	2.28008	3.61513	0.630705	-0.664963
ZNF335	3.59322	5.69715	0.630705	-0.664963
THG1L	9.19369	14.5769	0.630705	-0.664963
TST	7.3829	11.7058	0.630705	-0.664963
ACYP2	6.54543	10.378	0.630705	-0.664963
IQCG	2.10512	3.33773	0.630705	-0.664963
RNF126P1	1.51717	2.40551	0.630705	-0.664963
RNF31	4.4986	7.13266	0.630705	-0.664963
MON1B	4.30645	6.82799	0.630705	-0.664963
FGFR3	3.54275	5.61712	0.630705	-0.664963
STK19	1.50122	2.38023	0.630705	-0.664963
KPNA5	1.85322	2.93834	0.630705	-0.664963
ICE2	17.2773	27.3918	0.630748	-0.664864
MANEA	15.5228	24.6015	0.630972	-0.664353
PRMT3	52.2086	82.7216	0.631136	-0.663977
EEF1A1	22.0156	34.8791	0.6312	-0.663832
FGFRL1	16.6527	26.3721	0.63145	-0.663259
NAA25	28.751	45.5195	0.63162	-0.662871
L3MBTL2	5.74419	9.09195	0.631788	-0.662486
PCSK6	7.96006	12.5993	0.631789	-0.662486
FAM134A	3.39483	5.37219	0.631927	-0.66217
LMLN	4.7344	7.492	0.631927	-0.66217
DEXI	9.10335	14.4016	0.632106	-0.661761
MID1	17.1649	27.1473	0.632287	-0.661349
SRPK1	24.8311	39.2492	0.632651	-0.660517
VRK3	4.95634	7.83378	0.632688	-0.660433
ZNF273	2.23465	3.53199	0.632688	-0.660433
SOCS7	4.09383	6.4668	0.633054	-0.6596
CASP3	20.6133	32.5489	0.633305	-0.659028
PRMT7	6.53605	10.3126	0.633792	-0.657919
USP11	18.4363	29.0852	0.633871	-0.657739
CHP1	9.39519	14.8219	0.633871	-0.657739
LMO7	10.1267	15.9708	0.634074	-0.657277
C9orf116	8.38108	13.2174	0.634096	-0.657227
MYBL1	16.1046	25.3808	0.634519	-0.656266
SUV39H1	8.62296	13.5895	0.63453	-0.656239
PCMTD1	4.05659	6.39285	0.634551	-0.656193
ZCCHC3	8.81478	13.8891	0.634657	-0.655952
DHX38	7.828	12.3333	0.634704	-0.655844
AMMECR1	9.88051	15.5669	0.634715	-0.65582
HSP90AA1	2057.5	3240.55	0.634922	-0.655349
CCNE2	29.2986	46.1018	0.635519	-0.653992
BLM	7.68243	12.0858	0.635658	-0.653677
OIP5-AS1	24.2827	38.1965	0.63573	-0.653513
RIN3	3.81179	5.99374	0.635961	-0.65299
CCDC142	0.85734	1.3481	0.635961	-0.65299
STAG2	47.1968	74.1265	0.636706	-0.651301
TSC2	1.65776	2.60188	0.637141	-0.650316
GPR125	9.04875	14.1998	0.637246	-0.650079
UNK	12.7795	20.0457	0.637518	-0.649462
EIF4G2	466.334	731.225	0.637743	-0.648952
GDE1	48.5666	76.1532	0.637749	-0.64894
EEF1E1	268.929	421.652	0.637799	-0.648827
C12orf43	18.4158	28.8689	0.637912	-0.648571
PIGF	7.51034	11.7725	0.637954	-0.648475
NAGPA	2.57726	4.03987	0.637954	-0.648475
EIF5AL1	5.03903	7.88935	0.638714	-0.646758
RCN1	24.3728	38.1473	0.638912	-0.64631
VPRBP	3.08721	4.83128	0.639004	-0.646104
GSG2	3.09909	4.84497	0.639651	-0.644643
PAAF1	5.76498	9.0127	0.639651	-0.644643
METTL16	9.03708	14.1281	0.639651	-0.644643
HMBOX1	2.47402	3.86728	0.639732	-0.644462
ANKRD46	7.72153	12.0687	0.639799	-0.644309
RAVER2	6.73894	10.5302	0.63996	-0.643945
RBBP4	6.05424	9.46024	0.639966	-0.643932
NEURL4	1.9941	3.11533	0.64009	-0.643653
CNPY3	11.707	18.2896	0.64009	-0.643653
NUDT14	11.9163	18.6166	0.64009	-0.643653
UBFD1	14.5988	22.7961	0.640408	-0.642937
TSSC4	8.4254	13.1563	0.640408	-0.642937
INTS10	38.5353	60.1699	0.640442	-0.642861
ANKRD28	11.8276	18.4631	0.640607	-0.64249
FAM96A	192.947	301.187	0.64062	-0.64246
DCP1A	9.47253	14.7858	0.640648	-0.642395
MRPL42	101.606	158.39	0.641491	-0.6405
CHKA	10.1371	15.802	0.641505	-0.640468
FAIM	64.033	99.7699	0.641807	-0.63979
MANEAL	5.165	8.04035	0.642385	-0.638491
TMTC2	0.344146	0.535733	0.642385	-0.638491
LOC101928489	0.86519	1.34684	0.642385	-0.638491
PSMB8-AS1	1.84331	2.86949	0.642385	-0.638491
GBX2	1.24821	1.94308	0.642385	-0.638491
ENKD1	1.08346	1.68662	0.642385	-0.638491
FIZ1	1.87935	2.92558	0.642385	-0.638491
CCDC102A	1.37205	2.13587	0.642385	-0.638491
NADSYN1	2.05723	3.20249	0.642385	-0.638491
ZNF784	0.834848	1.29961	0.642385	-0.638491
LSM11	1.30133	2.02578	0.642385	-0.638491
RCN2	204.812	318.831	0.642385	-0.638491
TBL3	8.99344	14.0001	0.642385	-0.638491
PPP1R16A	4.39672	6.84437	0.642385	-0.638491
SFT2D2	3.89336	6.06079	0.642385	-0.638491
FBXW9	0.95933	1.49339	0.642385	-0.638491
WISP2	1.18686	1.84759	0.642385	-0.638491
RNF169	1.31853	2.05255	0.642385	-0.638491
ZBTB42	0.458294	0.713426	0.642385	-0.638491
IFT140	0.318311	0.495514	0.642385	-0.638491
NXT2	4.52977	7.05135	0.642396	-0.638464
ZNF248	1.5546	2.41925	0.642595	-0.638018
SLC35E1	14.3307	22.2973	0.642711	-0.637759
CPNE3	39.1923	60.975	0.642759	-0.63765
POLE3	146.433	227.681	0.643149	-0.636775
PKP3	21.1187	32.8344	0.643188	-0.636689
IRAK1	64.2928	99.9312	0.643371	-0.636278
MEIS2	5.78115	8.98559	0.64338	-0.636256
BLMH	45.9775	71.4596	0.643406	-0.636199
PHPT1	39.2414	60.9894	0.643413	-0.636183
TMEM5	54.7547	85.0879	0.643507	-0.635973
ATR	7.35128	11.4228	0.643563	-0.635846
YOD1	7.66984	11.9154	0.643691	-0.635559
PP7080	37.4763	58.207	0.643845	-0.635216
KLHDC3	14.5357	22.5672	0.644109	-0.634623
PLSCR4	0.861336	1.33706	0.6442	-0.63442
RPL7L1	20.3884	31.6481	0.64422	-0.634375
GHITM	182.081	282.575	0.644364	-0.634051
AAR2	14.3443	22.2603	0.644392	-0.633989
ANKRD18B	5.15048	7.98703	0.644855	-0.632953
METTL1	8.61397	13.358	0.644855	-0.632953
NUP155	19.3903	30.0652	0.644943	-0.632757
PTCD3	10.987	17.0349	0.644967	-0.632703
LINC00909	2.30239	3.56754	0.645372	-0.631796
AQR	12.5961	19.5175	0.645372	-0.631796
C6orf106	11.6578	18.0523	0.645778	-0.630889
[truncated: 13,717 more rows]

## Sheet: Sheet2
Genes	Hone1_Lbut	Hone1_L	fold_change	log2foldchange
FAM45A	0	16.8049	5.95064e-06	-17.3585
CHKB	0	15.5122	6.44652e-06	-17.243
MIR3917	0	11.2025	8.92661e-06	-16.7735
CCL26	0	9.68825	1.03218e-05	-16.5639
SNORD45C	0	7.75612	1.2893e-05	-16.243
MIR4723	0	7.46886	1.33889e-05	-16.1886
SNORA26	0	7.43825	1.3444e-05	-16.1827
SNORD35B	0	6.95376	1.43807e-05	-16.0855
GSN	0	6.28044	1.59225e-05	-15.9386
SNORD116-4	0	6.17324	1.6199e-05	-15.9137
LOC102723385	0	5.73438	1.74387e-05	-15.8074
C8orf44-SGK3	0	5.40158	1.85131e-05	-15.7211
SNORD44	0	4.95883	2.0166e-05	-15.5977
MIR6886	0	4.95883	2.0166e-05	-15.5977
LOC100289361	0	4.85536	2.05958e-05	-15.5673
SNORD42A	0	4.80141	2.08272e-05	-15.5512
MIR6835	0	4.72639	2.11578e-05	-15.5284
MIR6877	0	4.72639	2.11578e-05	-15.5284
MIR6842	0	4.65367	2.14884e-05	-15.5061
SNORA72	0	4.58316	2.1819e-05	-15.4841
SNORA10	0	4.5487	2.19843e-05	-15.4732
SNORA52	0	4.51476	2.21496e-05	-15.4624
MIR1229	0	4.38389	2.28108e-05	-15.4199
MIR6748	0	4.2604	2.3472e-05	-15.3787
MIR6505	0	4.2604	2.3472e-05	-15.3787
SNORD96A	0	4.20123	2.38025e-05	-15.3585
MIR6761	0	4.20123	2.38025e-05	-15.3585
MIR6832	0	4.20026	2.3808e-05	-15.3582
SNORD4B	0	4.08768	2.44637e-05	-15.319
MYZAP	0	3.9455	2.53453e-05	-15.2679
MIR6801	0	3.82897	2.61167e-05	-15.2247
TNFRSF18	0	3.78111	2.64473e-05	-15.2065
MIR2117	0	3.78111	2.64473e-05	-15.2065
MIR6785	0	3.73443	2.67779e-05	-15.1886
MIR4263	0	3.64444	2.7439e-05	-15.1534
MIR15A	0	3.64421	2.74408e-05	-15.1533
VTRNA1-2	0	3.43737	2.9092e-05	-15.069
MIR3911	0	3.43721	2.90934e-05	-15.069
CETN4P	0	3.36633	2.9706e-05	-15.0389
CNTF	0	3.2523	3.07475e-05	-14.9892
MIR647	0	3.15092	3.17367e-05	-14.9435
PRH1	0	3.15092	3.17368e-05	-14.9435
MIR573	0	3.05544	3.27285e-05	-14.8991
MIR589	0	3.05491	3.27342e-05	-14.8988
LOC100506499	0	3.03355	3.29646e-05	-14.8887
LOC101929613	0	3.02489	3.30591e-05	-14.8846
COPZ2	0	2.96235	3.3757e-05	-14.8545
PRH1-PRR4	0	2.90853	3.43816e-05	-14.828
LOC400043	0	2.81889	3.5475e-05	-14.7828
ANKHD1-EIF4EBP3	0	2.7499	3.6365e-05	-14.7471
SNORD67	0	2.72512	3.66956e-05	-14.734
WFDC3	0	2.7224	3.67323e-05	-14.7326
SNORD89	0	2.65341	3.76874e-05	-14.6956
LMLN-AS1	0	2.48962	4.01668e-05	-14.6036
ALOX5AP	0	2.44757	4.08569e-05	-14.5791
HMSD	0	2.41991	4.13239e-05	-14.5627
C15orf65	0	2.41347	4.14341e-05	-14.5588
SLC2A3	0	2.3812	4.19957e-05	-14.5394
FLJ42351	0	2.354	4.24809e-05	-14.5228
ERCC5	0	2.354	4.24809e-05	-14.5228
SNORA45A	0	2.32675	4.29783e-05	-14.506
BIRC7	0	2.30204	4.34396e-05	-14.4906
KRT19	0	2.26198	4.4209e-05	-14.4653
SNORA65	0	2.22418	4.49604e-05	-14.441
PI3	0	2.18403	4.57868e-05	-14.4147
LSP1P3	0	2.04384	4.89275e-05	-14.319
CITED1	0	2.04306	4.89462e-05	-14.3184
ECSCR	0	2.03013	4.9258e-05	-14.3093
MILR1	0	1.91752	5.21507e-05	-14.227
PRPH	0	1.8759	5.33078e-05	-14.1953
MIR6753	0	1.84444	5.42169e-05	-14.1709
CEMP1	0	1.78987	5.58699e-05	-14.1276
ITGA9-AS1	0	1.77934	5.62005e-05	-14.1191
RPPH1	0	1.77413	5.63658e-05	-14.1148
LOC102723483	0	1.75356	5.70269e-05	-14.098
LINC01405	0	1.68517	5.93411e-05	-14.0406
LOC101927178	0	1.62192	6.16552e-05	-13.9854
NPFF	0	1.53288	6.52366e-05	-13.904
RIBC2	0	1.50813	6.63071e-05	-13.8805
LOC102060414	0	1.50492	6.64488e-05	-13.8774
LOC654342	0	1.49994	6.66692e-05	-13.8726
ZRANB2-AS1	0	1.49254	6.69998e-05	-13.8655
LOC100506178	0	1.49132	6.70549e-05	-13.8643
HLA-DQB1	0	1.47555	6.77711e-05	-13.849
GSTO2	0	1.46306	6.83497e-05	-13.8367
LYRM9	0	1.42972	6.99436e-05	-13.8034
PILRB	0	1.39396	7.17382e-05	-13.7669
HIST1H2AJ	0	1.37808	7.25647e-05	-13.7504
ST3GAL6-AS1	0	1.37079	7.29504e-05	-13.7427
EFHD1	0	1.36804	7.30973e-05	-13.7398
MMP7	0	1.3516	7.39863e-05	-13.7224
NBPF25P	0	1.34439	7.4383e-05	-13.7147
TERC	0	1.34141	7.45483e-05	-13.7115
RBM24	0	1.31826	7.58576e-05	-13.6863
C18orf32	0	1.30383	7.66971e-05	-13.6705
LINC00706	0	1.29085	7.74685e-05	-13.656
RNF103-CHMP3	0	1.28718	7.7689e-05	-13.6519
LOC102288414	0	1.24481	8.03336e-05	-13.6036
HM13-AS1	0	1.23717	8.08295e-05	-13.5948
ERI3-IT1	0	1.21481	8.23171e-05	-13.5684
AKAP2	0	1.17243	8.5293e-05	-13.5172
HAR1A	0	1.16836	8.559e-05	-13.5122
PPP1R14A	0	1.16791	8.56231e-05	-13.5116
PSG5	0	1.15454	8.66148e-05	-13.495
CNFN	0	1.14579	8.7276e-05	-13.4841
LGALS2	0	1.14579	8.7276e-05	-13.4841
FAM222A-AS1	0	1.12449	8.8929e-05	-13.457
PAEP	0	1.11895	8.93697e-05	-13.4499
SAMD13	0	1.10714	9.0323e-05	-13.4345
MYO16-AS1	0	1.10599	9.04166e-05	-13.4331
ST6GALNAC1	0	1.10085	9.0839e-05	-13.4263
SUCNR1	0	1.09996	9.09125e-05	-13.4252
LOC375196	0	1.09399	9.14084e-05	-13.4173
TNNI3	0	1.07903	9.26757e-05	-13.3975
HLA-DMA	0	1.07839	9.27308e-05	-13.3966
LOC101927275	0	1.07392	9.31164e-05	-13.3906
SHD	0	1.05683	9.46225e-05	-13.3675
IRF5	0	1.04559	9.564e-05	-13.352
RGS17	0	1.03168	9.69293e-05	-13.3327
LUCAT1	0	1.01962	9.80753e-05	-13.3158
GNRHR2	0	1.01848	9.81855e-05	-13.3141
CNTD2	0	0.998862	0.000100114	-13.2861
YPEL3	0	0.981812	0.000101852	-13.2612
ZFP69	0	0.980741	0.000101964	-13.2597
LINC00944	0	0.974199	0.000102649	-13.25
PROCA1	0	0.970292	0.000103062	-13.2442
LINC01431	0	0.951222	0.000105128	-13.2156
CECR5-AS1	0	0.942332	0.00010612	-13.202
C10orf95	0	0.941355	0.00010623	-13.2005
RCAN3AS	0	0.927879	0.000107773	-13.1797
LINC00337	0	0.922221	0.000108434	-13.1709
LOC102724224	0	0.922221	0.000108434	-13.1709
LOC100506476	0	0.922221	0.000108434	-13.1709
FAM63A	0	0.908302	0.000110096	-13.149
SEMA3B-AS1	0	0.894937	0.00011174	-13.1276
RARB	0	0.881938	0.000113387	-13.1065
HAR1B	0	0.87551	0.000114219	-13.0959
LOC554206	0	0.875088	0.000114274	-13.0952
LOC101927571	0	0.871725	0.000114715	-13.0897
PSG6	0	0.870721	0.000114847	-13.088
CCDC107	0	0.86922	0.000115046	-13.0855
APOBEC3H	0	0.867558	0.000115266	-13.0827
NPPB	0	0.86673	0.000115376	-13.0814
SAMD12-AS1	0	0.86302	0.000115872	-13.0752
LEAP2	0	0.855696	0.000116864	-13.0629
NMRK2	0	0.855696	0.000116864	-13.0629
HOXA-AS2	0	0.852081	0.00011736	-13.0568
ERICH6-AS1	0	0.849687	0.00011769	-13.0527
KISS1	0	0.847307	0.000118021	-13.0487
GATA6-AS1	0	0.845885	0.000118219	-13.0462
IFI27	0	0.840246	0.000119013	-13.0366
SBSN	0	0.83676	0.000119509	-13.0306
FABP3	0	0.827225	0.000120886	-13.0141
HIST1H4D	0	0.82422	0.000121327	-13.0088
TMEM220-AS1	0	0.812011	0.000123151	-12.9873
CGA	0	0.805562	0.000124137	-12.9758
OGDHL	0	0.804063	0.000124368	-12.9731
CCDC153	0	0.788758	0.000126782	-12.9454
MSMB	0	0.777606	0.0001286	-12.9248
TCN1	0	0.772147	0.000129509	-12.9147
LOC100506321	0	0.768713	0.000130088	-12.9082
LOC100996634	0	0.768128	0.000130187	-12.9071
WDR16	0	0.760404	0.000131509	-12.8926
LOC100507420	0	0.756333	0.000132217	-12.8848
LOC100506368	0	0.750592	0.000133228	-12.8738
LOC101927762	0	0.743215	0.00013455	-12.8596
SYCE1L	0	0.741394	0.000134881	-12.856
HCG14	0	0.735982	0.000135873	-12.8455
HIST4H4	0	0.734196	0.000136204	-12.8419
IGFBP1	0	0.733306	0.000136369	-12.8402
CCR10	0	0.729474	0.000137085	-12.8326
LOC100507564	0	0.725392	0.000137856	-12.8245
SAP25	0	0.724524	0.000138022	-12.8228
FLJ22447	0	0.723657	0.000138187	-12.8211
FOCAD-AS1	0	0.715103	0.00013984	-12.8039
SENP3-EIF4A1	0	0.715103	0.00013984	-12.8039
PPM1J	0	0.705924	0.000141658	-12.7853
LOC145783	0	0.70183	0.000142485	-12.7769
GNGT2	0	0.699396	0.000142981	-12.7719
LINC01191	0	0.693781	0.000144138	-12.7603
LOC254896	0	0.692987	0.000144303	-12.7586
KLK1	0	0.690613	0.000144799	-12.7537
ITGB6	0	0.68609	0.000145753	-12.7442
KRTCAP3	0	0.682049	0.000146617	-12.7357
SERPINB3	0	0.680897	0.000146865	-12.7332
HIST1H2BM	0	0.678226	0.000147444	-12.7275
LOC283352	0	0.673694	0.000148435	-12.7179
LOC101926906	0	0.669223	0.000149427	-12.7083
HIST3H2BB	0	0.669223	0.000149427	-12.7083
HIST1H2BL	0	0.667745	0.000149758	-12.7051
RAMP1	0	0.665542	0.000150254	-12.7003
SMIM2-AS1	0	0.66408	0.000150584	-12.6971
HIST2H3D	0	0.661901	0.00015108	-12.6924
PRRG2	0	0.651447	0.000153504	-12.6694
HIST1H3F	0	0.649117	0.000154055	-12.6643
HIST1H3A	0	0.644965	0.000155047	-12.655
GJA9-MYCBP	0	0.640866	0.000156039	-12.6458
LOC100505592	0	0.636818	0.000157031	-12.6367
NPIPB5	0	0.634148	0.000157692	-12.6306
HIST1H3J	0	0.632821	0.000158022	-12.6276
FAM47E	0	0.628875	0.000159014	-12.6186
FABP6	0	0.625745	0.00015981	-12.6114
LINC01214	0	0.624977	0.000160006	-12.6096
NKAPP1	0	0.624977	0.000160006	-12.6096
PIP5KL1	0	0.624112	0.000160228	-12.6076
VWA7	0	0.622832	0.000160557	-12.6046
NEIL1	0	0.614953	0.000162614	-12.5863
TFF1	0	0.614814	0.000162651	-12.5859
RDH5	0	0.613567	0.000162981	-12.583
DYNLRB2	0	0.608629	0.000164304	-12.5713
PRTN3	0	0.604373	0.000165461	-12.5612
RPS17	0	0.602263	0.000166041	-12.5562
CSDC2	0	0.597804	0.000167279	-12.5455
NPY4R	0	0.596625	0.00016761	-12.5426
S100P	0	0.593115	0.000168601	-12.5341
CXorf58	0	0.588881	0.000169814	-12.5238
LOC102724050	0	0.588499	0.000169924	-12.5228
P2RY1	0	0.583955	0.000171246	-12.5116
CA9	0	0.583955	0.000171246	-12.5116
SMC5-AS1	0	0.582269	0.000171742	-12.5075
CXorf31	0	0.581709	0.000171907	-12.5061
LHB	0	0.578372	0.000172899	-12.4978
SLC30A3	0	0.578096	0.000172982	-12.4971
CXCR4	0	0.577648	0.000173116	-12.496
LINC00687	0	0.577268	0.00017323	-12.495
AZIN2	0	0.575073	0.000173891	-12.4895
FBLL1	0	0.571812	0.000174883	-12.4813
NINJ2	0	0.569658	0.000175544	-12.4759
OR51B5	0	0.567677	0.000176157	-12.4709
ZNF846	0	0.567255	0.000176288	-12.4698
HIST2H2AA3+HIST2H2AA4	0	0.566458	0.000176535	-12.4678
VPS37D	0	0.565399	0.000176866	-12.4651
BATF2	0	0.565399	0.000176866	-12.4651
PGAM1P5	0	0.564608	0.000177114	-12.463
MESP2	0	0.563294	0.000177527	-12.4597
LOC101927620	0	0.562247	0.000177858	-12.457
NUDT9P1	0	0.561724	0.000178023	-12.4556
FZD10	0	0.552996	0.000180833	-12.4331
NBEAP1	0	0.551987	0.000181164	-12.4304
PDC	0	0.550641	0.000181606	-12.4269
TMEM45B	0	0.548235	0.000182403	-12.4206
LOC414300	0	0.547987	0.000182486	-12.4199
LINC01012	0	0.545811	0.000183214	-12.4142
C2orf81	0	0.542824	0.000184222	-12.4063
USP50	0	0.542094	0.00018447	-12.4043
JAZF1-AS1	0	0.541609	0.000184635	-12.403
FAM133A	0	0.539998	0.000185186	-12.3987
MYH16	0	0.533725	0.000187362	-12.3819
TDO2	0	0.532863	0.000187666	-12.3795
ZNF724P	0	0.53255	0.000187776	-12.3787
CLCA3P	0	0.531926	0.000187996	-12.377
EFCAB10	0	0.531615	0.000188106	-12.3762
ACSM6	0	0.529752	0.000188767	-12.3711
LOC100506688	0	0.525915	0.000190145	-12.3606
GPR17	0	0.524926	0.000190503	-12.3579
CA14	0	0.521233	0.000191853	-12.3477
VPREB3	0	0.517075	0.000193396	-12.3362
TMEM91	0	0.515402	0.000194023	-12.3315
PSG11	0	0.514874	0.000194222	-12.33
LOC113230	0	0.512258	0.000195214	-12.3227
KRTAP3-1	0	0.510099	0.00019604	-12.3166
C20orf141	0	0.509291	0.000196351	-12.3143
DCN	0	0.50164	0.000199346	-12.2924
CORT	0	0.500809	0.000199677	-12.29
DCST2	0	0.500188	0.000199925	-12.2883
GCOM1	0	0.498334	0.000200669	-12.2829
LINC00326	0	0.498334	0.000200669	-12.2829
NPB	0	0.494263	0.000202322	-12.2711
SLC25A34	0	0.492652	0.000202983	-12.2664
TIGD4	0	0.489464	0.000204305	-12.257
FLJ22184	0	0.487885	0.000204966	-12.2523
OLFM2	0	0.487623	0.000205077	-12.2515
RBM5-AS1	0	0.487099	0.000205297	-12.25
MGC16275	0	0.486903	0.00020538	-12.2494
PKDCC	0	0.483788	0.000206702	-12.2402
ATP6V1G3	0	0.478621	0.000208933	-12.2247
SMCO2	0	0.475611	0.000210256	-12.2156
LINC00260	0	0.474492	0.000210752	-12.2122
WNT11	0	0.470922	0.00021235	-12.2013
LOC100132352	0	0.470433	0.00021257	-12.1998
STARD13-AS	0	0.468975	0.000213231	-12.1953
LINC00628	0	0.468975	0.000213231	-12.1953
LOC100288814	0	0.468975	0.000213231	-12.1953
GLIDR	0	0.468793	0.000213314	-12.1947
ZNF341-AS1	0	0.468249	0.000213562	-12.1931
MAGED1	0	0.466953	0.000214154	-12.1891
PCAT6	0	0.465367	0.000214884	-12.1842
ASAH2B	0	0.46394	0.000215545	-12.1797
TTC9	0	0.463851	0.000215587	-12.1794
GIMD1	0	0.462521	0.000216206	-12.1753
LINC00310	0	0.461815	0.000216537	-12.1731
ZGLP1	0	0.458316	0.00021819	-12.1621
LINC00853	0	0.457623	0.000218521	-12.1599
CD36	0	0.454664	0.000219942	-12.1506
LTC4S	0	0.453506	0.000220504	-12.1469
OGFR-AS1	0	0.452827	0.000220835	-12.1447
PDCD4-AS1	0	0.450355	0.000222047	-12.1368
TRIM31	0	0.447689	0.000223369	-12.1283
OOEP	0	0.446807	0.00022381	-12.1254
C19orf73	0	0.444836	0.000224802	-12.1191
KLK5	0	0.444836	0.000224802	-12.1191
LINC01433	0	0.443532	0.000225463	-12.1148
SHISA4	0	0.442543	0.000225967	-12.1116
LINC01125	0	0.441912	0.000226289	-12.1095
IQCD	0	0.441912	0.000226289	-12.1095
LOC101928891	0	0.441589	0.000226455	-12.1085
ACR	0	0.441589	0.000226455	-12.1085
HLA-DOB	0	0.440946	0.000226785	-12.1064
CALB2	0	0.439664	0.000227447	-12.1022
TUBA4B	0	0.438389	0.000228108	-12.098
LOC101927211	0	0.438389	0.000228108	-12.098
LOC100130950	0	0.438072	0.000228273	-12.097
PNMA2	0	0.436942	0.000228863	-12.0932
ZMIZ1-AS1	0	0.436355	0.000229171	-12.0913
GRK4	0	0.436282	0.00022921	-12.091
FAHD2CP	0	0.429062	0.000233067	-12.067
STK4-AS1	0	0.428859	0.000233177	-12.0663
BHLHA15	0	0.428454	0.000233397	-12.0649
RASGRP2	0	0.425795	0.000234855	-12.0559
GIP	0	0.425441	0.00023505	-12.0547
KRTAP2-2	0	0.424248	0.000235711	-12.0507
MEOX1	0	0.423851	0.000235932	-12.0493
KRT4	0	0.422667	0.000236593	-12.0453
DMBX1	0	0.421734	0.000237116	-12.0421
KLK9	0	0.420707	0.000237695	-12.0386
SLC29A4	0	0.418959	0.000238687	-12.0326
BAALC-AS1	0	0.416651	0.000240009	-12.0246
LOC100505478	0	0.413801	0.000241662	-12.0147
NFE2	0	0.413136	0.000242051	-12.0124
ICA1	0	0.412086	0.000242668	-12.0087
ANXA13	0	0.411549	0.000242984	-12.0068
LOC101928154	0	0.408217	0.000244968	-11.9951
LEF1-AS1	0	0.408098	0.000245039	-11.9947
PNMT	0	0.407378	0.000245472	-11.9922
TMEM220	0	0.407255	0.000245546	-11.9917
KRT23	0	0.404963	0.000246936	-11.9836
SLC1A1	0	0.404505	0.000247216	-11.9819
C1orf146	0	0.402781	0.000248274	-11.9758
SPOCK2	0	0.400472	0.000249705	-11.9675
TMOD1	0	0.399854	0.000250091	-11.9653
LOC100507406	0	0.399589	0.000250257	-11.9643
CACNB4	0	0.399092	0.000250569	-11.9625
CCDC37-AS1	0	0.396967	0.00025191	-11.9548
GPR20	0	0.396446	0.000252241	-11.9529
CRYBB2	0	0.396446	0.000252241	-11.9529
LINC01030	0	0.39541	0.000252902	-11.9491
CETP	0	0.393609	0.000254059	-11.9425
SYNE4	0	0.392587	0.00025472	-11.9388
RPL31P11	0	0.390812	0.000255877	-11.9323
PYCARDOS	0	0.388803	0.0002572	-11.9248
KCNH2	0	0.38876	0.000257228	-11.9247
BICC1	0	0.38793	0.000257778	-11.9216
NPM2	0	0.387205	0.000258261	-11.9189
KANK4	0	0.386602	0.000258664	-11.9166
ZRANB2-AS2	0	0.38632	0.000258853	-11.9156
AHSG	0	0.384601	0.00026001	-11.9091
LOC101929268	0	0.382574	0.000261387	-11.9015
GMDS-AS1	0	0.380968	0.000262489	-11.8955
PIK3IP1	0	0.379058	0.000263812	-11.8882
ATP5L2	0	0.378584	0.000264142	-11.8864
SERPINA1	0	0.378229	0.00026439	-11.885
KRT33B	0	0.376464	0.00026563	-11.8783
SPATA12	0	0.376074	0.000265905	-11.8768
LOC283070	0	0.376074	0.000265905	-11.8768
LINC00899	0	0.375762	0.000266126	-11.8756
ZNF223	0	0.375141	0.000266566	-11.8732
ADM2	0	0.37511	0.000266589	-11.8731
ANGPTL4	0	0.374831	0.000266787	-11.872
CSN3	0	0.374367	0.000267117	-11.8702
TMEM59L	0	0.373673	0.000267613	-11.8676
PTGDS	0	0.372523	0.00026844	-11.8631
LINC00921	0	0.371608	0.000269101	-11.8596
IL5	0	0.370697	0.000269762	-11.856
MYO1G	0	0.369001	0.000271002	-11.8494
FCRLA	0	0.368889	0.000271085	-11.849
PRICKLE4	0	0.367544	0.000272076	-11.8437
LOC441455	0	0.367321	0.000272242	-11.8428
PTGER2	0	0.366209	0.000273068	-11.8385
ZCWPW2	0	0.364664	0.000274225	-11.8324
PHKG1	0	0.363733	0.000274927	-11.8287
NANOS3	0	0.363132	0.000275382	-11.8263
FSCN2	0	0.362262	0.000276043	-11.8228
TUBAL3	0	0.360535	0.000277366	-11.8159
TTC9B	0	0.358824	0.000278688	-11.8091
FOLR3	0	0.357975	0.000279349	-11.8056
LINC01227	0	0.357129	0.00028001	-11.8022
LOC101927380	0	0.356919	0.000280176	-11.8014
MLC1	0	0.356196	0.000280745	-11.7985
LINC01144	0	0.353788	0.000282655	-11.7887
LOC101929655	0	0.353788	0.000282655	-11.7887
KC6	0	0.353375	0.000282986	-11.787
NUPR1	0	0.352551	0.000283647	-11.7836
ENOX1	0	0.351933	0.000284145	-11.7811
LINC00412	0	0.349294	0.000286292	-11.7702
FLVCR2	0	0.347692	0.000287611	-11.7636
DHRS9	0	0.347289	0.000287945	-11.7619
SLC27A6	0	0.347288	0.000287945	-11.7619
CNGA1	0	0.344588	0.000290201	-11.7507
P2RX6	0	0.343195	0.000291379	-11.7448
YJEFN3	0	0.342958	0.000291581	-11.7438
OCLM	0	0.342182	0.000292242	-11.7405
THRB-AS1	0	0.341795	0.000292573	-11.7389
ZMYND10	0	0.341217	0.000293069	-11.7365
RERGL	0	0.341024	0.000293234	-11.7357
HPCAL4	0	0.340948	0.0002933	-11.7353
C12orf54	0	0.340257	0.000293895	-11.7324
C2orf61	0	0.339493	0.000294557	-11.7292
CDC42EP5	0	0.339493	0.000294557	-11.7292
C10orf11	0	0.339113	0.000294887	-11.7275
RBPMS-AS1	0	0.338354	0.000295548	-11.7243
GAL3ST1	0	0.337787	0.000296044	-11.7219
TAS2R19	0	0.336098	0.000297532	-11.7147
HOXB8	0	0.331858	0.000301334	-11.6964
AZU1	0	0.331676	0.000301499	-11.6956
CASP5	0	0.331313	0.000301829	-11.694
CABP1	0	0.330189	0.000302857	-11.6891
LINC01268	0	0.329988	0.000303042	-11.6882
C1orf162	0	0.329868	0.000303152	-11.6877
CRHBP	0	0.32915	0.000303813	-11.6845
SLC12A3	0	0.327782	0.00030508	-11.6785
CACNG6	0	0.327015	0.000305797	-11.6751
CPA5	0	0.326637	0.00030615	-11.6735
KMO	0	0.324907	0.00030778	-11.6658
OR51B4	0	0.324211	0.000308441	-11.6627
SLC9A5	0	0.32395	0.000308689	-11.6616
TNFRSF13C	0	0.323864	0.000308772	-11.6612
TESC	0	0.322483	0.000310094	-11.655
SLC25A18	0	0.322483	0.000310094	-11.655
MAPK15	0	0.320433	0.000312078	-11.6458
MARK2P9	0	0.319755	0.000312739	-11.6428
CCDC42B	0	0.319081	0.0003134	-11.6397
FKBP1B	0	0.318074	0.000314392	-11.6351
CELA1	0	0.31774	0.000314723	-11.6336
CYP26A1	0	0.317503	0.000314957	-11.6326
TP73-AS1	0	0.316908	0.000315549	-11.6298
ROPN1L	0	0.316742	0.000315714	-11.6291
ENTPD3-AS1	0	0.316576	0.00031588	-11.6283
TYRP1	0	0.315531	0.000316926	-11.6236
PAOX	0	0.315421	0.000317037	-11.6231
VENTXP7	0	0.315092	0.000317367	-11.6216
GLIPR1L1	0	0.314764	0.000317698	-11.6201
IZUMO4	0	0.314764	0.000317698	-11.6201
LINC00648	0	0.314437	0.000318028	-11.6186
LOC100129203	0	0.311844	0.000320673	-11.6066
ODF3B	0	0.311844	0.000320673	-11.6066
RGMB-AS1	0	0.310882	0.000321665	-11.6022
WASH2P	0	0.310404	0.000322161	-11.5999
C14orf183	0	0.310245	0.000322326	-11.5992
NRCAM	0	0.307847	0.000324837	-11.588
DMC1	0	0.30734	0.000325372	-11.5856
OR1F2P	0	0.307095	0.000325632	-11.5845
EFCAB6-AS1	0	0.306008	0.000326789	-11.5794
RNF180	0	0.305915	0.000326888	-11.5789
IGSF23	0	0.305853	0.000326954	-11.5786
LINC00620	0	0.304315	0.000328607	-11.5713
ROPN1B	0	0.302489	0.000330591	-11.5627
NR2E3	0	0.302337	0.000330756	-11.5619
JPH3	0	0.302337	0.000330756	-11.5619
IL1R2	0	0.301722	0.000331431	-11.559
FGF23	0	0.300685	0.000332574	-11.554
STAT5A	0	0.300309	0.000332991	-11.5522
OR52B6	0	0.300088	0.000333236	-11.5512
DPY19L2P3	0	0.299791	0.000333566	-11.5497
UPK1A	0	0.298902	0.000334558	-11.5455
LMNTD2	0	0.297872	0.000335715	-11.5405
NPW	0	0.297725	0.00033588	-11.5398
CTHRC1	0	0.296973	0.000336731	-11.5361
TAS2R31	0	0.296267	0.000337533	-11.5327
CHGA	0	0.296122	0.000337699	-11.532
MFSD4	0	0.295977	0.000337864	-11.5313
FUT3	0	0.295255	0.00033869	-11.5277
LOC152225	0	0.294967	0.000339021	-11.5263
ITGB2-AS1	0	0.29425	0.000339847	-11.5228
C1QL4	0	0.292967	0.000341335	-11.5165
SMIM2	0	0.292825	0.0003415	-11.5158
LRRC48	0	0.292825	0.0003415	-11.5158
FAM83F	0	0.292118	0.000342327	-11.5123
CA6	0	0.291977	0.000342492	-11.5116
EQTN	0	0.291977	0.000342492	-11.5116
IL18BP	0	0.291415	0.000343153	-11.5089
C2CD4C	0	0.290482	0.000344255	-11.5042
FAM83C	0	0.290482	0.000344255	-11.5042
KCNQ2	0	0.290094	0.000344716	-11.5023
HSD52	0	0.290018	0.000344806	-11.5019
SLITRK6	0	0.289394	0.00034555	-11.4988
SLC2A5	0	0.28773	0.000347548	-11.4905
PTGES2-AS1	0	0.287264	0.000348112	-11.4882
TCF21	0	0.286385	0.00034918	-11.4837
ONECUT1	0	0.285636	0.000350096	-11.48
ZNF613	0	0.283387	0.000352875	-11.4686
FMO4	0	0.282832	0.000353567	-11.4657
LOC729080	0	0.2827	0.000353732	-11.4651
FAM66D	0	0.282436	0.000354063	-11.4637
PTGFR	0	0.282172	0.000354394	-11.4624
RGS18	0	0.282041	0.000354559	-11.4617
AQP11	0	0.280993	0.000355881	-11.4563
LOC101927239	0	0.280862	0.000356046	-11.4556
FHIT	0	0.280342	0.000356708	-11.453
KCNV2	0	0.279823	0.000357369	-11.4503
ATP6V1G2	0	0.277767	0.000360014	-11.4397
C19orf38	0	0.277767	0.000360014	-11.4397
C17orf99	0	0.277513	0.000360344	-11.4383
LINC01121	0	0.275491	0.000362989	-11.4278
PTGES3L	0	0.27524	0.000363319	-11.4265
LOC653712	0	0.273993	0.000364972	-11.4199
LOC100507144	0	0.273251	0.000365964	-11.416
C6orf165	0	0.273127	0.000366129	-11.4154
ARMC12	0	0.271778	0.000367948	-11.4082
TCEAL3	0	0.271778	0.000367948	-11.4082
LPPR3	0	0.270926	0.000369105	-11.4037
CAPN3	0	0.270175	0.00037013	-11.3997
SEPSECS-AS1	0	0.270079	0.000370262	-11.3992
LDLRAD1	0	0.269238	0.000371419	-11.3947
DES	0	0.269118	0.000371584	-11.394
ADRA1B	0	0.268402	0.000372576	-11.3902
FLJ43681	0	0.268164	0.000372907	-11.3889
AGAP4	0	0.267754	0.000373477	-11.3867
APOD	0	0.267689	0.000373568	-11.3863
MMP11	0	0.267571	0.000373733	-11.3857
GAS2L1P2	0	0.267452	0.000373898	-11.3851
HSD17B3	0	0.266745	0.00037489	-11.3812
PALD1	0	0.264818	0.000377618	-11.3708
CD79A	0	0.264413	0.000378196	-11.3686
KCNF1	0	0.264298	0.000378361	-11.3679
RXFP4	0	0.263952	0.000378857	-11.3661
SOST	0	0.263034	0.00038018	-11.361
MCF2L-AS1	0	0.261895	0.000381832	-11.3548
HNRNPCL2	0	0.261668	0.000382163	-11.3535
MTMR9LP	0	0.260317	0.000384147	-11.3461
MESP1	0	0.260317	0.000384147	-11.3461
CXCL1	0	0.258758	0.000386461	-11.3374
LINC00960	0	0.256555	0.000389779	-11.3251
HCG26	0	0.256346	0.000390097	-11.3239
DNAAF1	0	0.255913	0.000390758	-11.3214
PRC1-AS1	0	0.253979	0.000393734	-11.3105
LOC101929340	0	0.253414	0.000394612	-11.3073
MDH1B	0	0.253341	0.000394726	-11.3069
GGT5	0	0.252284	0.000396379	-11.3008
SNCAIP	0	0.252169	0.000396559	-11.3002
SGPP2	0	0.252074	0.000396709	-11.2996
C6orf58	0	0.251864	0.00039704	-11.2984
PWAR1	0	0.25082	0.000398693	-11.2924
TSPEAR-AS1	0	0.250197	0.000399684	-11.2889
LOC440700	0	0.249991	0.000400015	-11.2877
LINC01107	0	0.249991	0.000400015	-11.2877
MIR663AHG	0	0.249372	0.000401007	-11.2841
MAP7D2	0	0.248392	0.00040259	-11.2784
LINC00578	0	0.247536	0.000403982	-11.2734
ARHGAP25	0	0.247479	0.000404075	-11.2731
TMEM178A	0	0.247422	0.000404167	-11.2728
ROS1	0	0.246326	0.000405966	-11.2664
ARHGEF26-AS1	0	0.246026	0.000406462	-11.2646
LOC101927416	0	0.245726	0.000406957	-11.2628
MTRNR2L4	0	0.245726	0.000406957	-11.2628
MAGEE1	0	0.245195	0.000407839	-11.2597
IL20	0	0.245129	0.000407949	-11.2593
GPR110	0	0.243743	0.000410269	-11.2511
SH3GL1P2	0	0.242963	0.000411586	-11.2465
C22orf24	0	0.242573	0.000412247	-11.2442
LURAP1	0	0.242379	0.000412577	-11.243
CCDC148	0	0.24228	0.000412746	-11.2425
SLC19A3	0	0.240899	0.000415112	-11.2342
RGS9	0	0.240548	0.000415718	-11.2321
LTA	0	0.236949	0.000422032	-11.2104
LRRC29	0	0.236238	0.000423303	-11.206
GNRH1	0	0.236135	0.000423487	-11.2054
KLHL7-AS1	0	0.235951	0.000423818	-11.2043
PSMG3-AS1	0	0.235156	0.00042525	-11.1994
PDX1	0	0.235125	0.000425305	-11.1992
SYT13	0	0.234624	0.000426214	-11.1961
PLA2R1	0	0.23426	0.000426876	-11.1939
C12orf80	0	0.234124	0.000427124	-11.1931
SNCB	0	0.233943	0.000427454	-11.1919
GATA5	0	0.233132	0.000428942	-11.1869
KCNK7	0	0.233042	0.000429107	-11.1864
MYBPHL	0	0.232148	0.00043076	-11.1808
MGC32805	0	0.23197	0.00043109	-11.1797
LOC642361	0	0.23197	0.00043109	-11.1797
MCEMP1	0	0.23126	0.000432413	-11.1753
C9orf66	0	0.230819	0.000433239	-11.1725
ST7-AS1	0	0.230555	0.000433735	-11.1709
NOX5	0	0.230117	0.000434562	-11.1682
LOC101928063	0	0.229855	0.000435058	-11.1665
ABCA12	0	0.229754	0.000435248	-11.1659
LOC101060542	0	0.229419	0.000435884	-11.1638
NEK10	0	0.229245	0.000436215	-11.1627
LINC01057	0	0.227264	0.000440017	-11.1502
SOHLH2	0	0.225234	0.000443984	-11.1372
RASA4CP	0	0.225066	0.000444314	-11.1361
C15orf59	0	0.225066	0.000444314	-11.1361
BCO2	0	0.224899	0.000444645	-11.1351
LRRC39	0	0.224732	0.000444975	-11.134
SLC52A3	0	0.224481	0.000445471	-11.1324
CRISP2	0	0.224066	0.000446298	-11.1297
ZNF233	0	0.221658	0.000451146	-11.1141
SULT1C2	0	0.22128	0.000451916	-11.1117
CLDN6	0	0.220795	0.00045291	-11.1085
TBX20	0	0.220793	0.000452913	-11.1085
EP300-AS1	0	0.219672	0.000455224	-11.1011
ASGR1	0	0.218246	0.000458199	-11.0917
PCDHB2	0	0.218088	0.00045853	-11.0907
PITX3	0	0.217931	0.00045886	-11.0897
ACTBL2	0	0.216527	0.000461836	-11.0803
FAM150B	0	0.216372	0.000462166	-11.0793
HSD17B7P2	0	0.215909	0.000463158	-11.0762
LIMD2	0	0.215832	0.000463323	-11.0757
GIPC2	0	0.214303	0.000466629	-11.0654
LOC728752	0	0.213924	0.000467456	-11.0629
CA7	0	0.213676	0.000467998	-11.0612
ACP5	0	0.213479	0.00046843	-11.0599
NBPF8	0	0.21317	0.000469108	-11.0578
KCNK12	0	0.212422	0.000470761	-11.0527
ANKRD30BL	0	0.212273	0.000471092	-11.0517
LOC100129046	0	0.211088	0.000473737	-11.0436
STXBP5-AS1	0	0.210793	0.000474398	-11.0416
ZNF540	0	0.210293	0.000475528	-11.0382
CACNG8	0	0.209576	0.000477153	-11.0333
EYA4-AS1	0	0.209045	0.000478365	-11.0296
LOC101927502	0	0.208901	0.000478696	-11.0286
KCNMB1	0	0.208469	0.000479687	-11.0256
SP9	0	0.207896	0.00048101	-11.0216
FOXB1	0	0.207326	0.000482332	-11.0177
REN	0	0.206477	0.000484316	-11.0118
LIPE-AS1	0	0.205216	0.000487291	-11.0029
LOC650368	0	0.204799	0.000488283	-11
ABHD12B	0	0.204799	0.000488283	-11
ACHE	0	0.204592	0.000488779	-10.9985
BST1	0	0.204384	0.000489275	-10.9971
AMT	0	0.20409	0.000489981	-10.995
N4BP2L1	0	0.203635	0.000491075	-10.9918
CCR8	0	0.203422	0.000491589	-10.9903
LOC728024	0	0.202876	0.000492911	-10.9864
ZFPM2	0	0.202559	0.000493683	-10.9841
LINC00597	0	0.202063	0.000494895	-10.9806
OSCAR	0	0.201123	0.000497209	-10.9739
MLIP	0	0.201091	0.000497288	-10.9736
LINC00887	0	0.200789	0.000498035	-10.9715
TMPRSS9	0	0.200456	0.000498862	-10.9691
ZNF132	0	0.199597	0.000501011	-10.9629
LOC100506142	0	0.199268	0.000501837	-10.9605
ATOH7	0	0.199137	0.000502168	-10.9595
FAM110D	0	0.198483	0.000503821	-10.9548
LAMC3	0	0.198418	0.000503986	-10.9543
ZNF503-AS1	0	0.198353	0.000504151	-10.9539
LINC01139	0	0.197576	0.000506135	-10.9482
C4orf19	0	0.197505	0.000506317	-10.9477
F10	0	0.196933	0.000507788	-10.9435
ERG	0	0.196549	0.000508779	-10.9407
NTNG2	0	0.195722	0.000510928	-10.9346
LINC00961	0	0.195659	0.000511094	-10.9341
CEBPE	0	0.195532	0.000511424	-10.9332
C1orf110	0	0.194902	0.000513077	-10.9285
PLXNB3	0	0.194808	0.000513325	-10.9278
CD101	0	0.193655	0.000516383	-10.9193
SPATA41	0	0.193407	0.000517044	-10.9174
CDKL4	0	0.193037	0.000518036	-10.9147
ETV7	0	0.192093	0.000520581	-10.9076
PLIN4	0	0.191691	0.000521672	-10.9046
TMEM204	0	0.191581	0.000521973	-10.9037
MMP16	0	0.190995	0.000523573	-10.8993
LPAL2	0	0.190687	0.00052442	-10.897
CHAD	0	0.190125	0.00052597	-10.8927
LOC100506124	0	0.189648	0.000527293	-10.8891
ZNF391	0	0.189529	0.000527623	-10.8882
FAM124A	0	0.189292	0.000528284	-10.8864
ST13P4	0	0.189292	0.000528284	-10.8864
PIWIL4	0	0.189114	0.00052878	-10.885
ZNF890P	0	0.187416	0.000533574	-10.872
LOC647323	0	0.187299	0.000533904	-10.8711
ARHGAP4	0	0.186032	0.000537541	-10.8613
HMX2	0	0.185804	0.000538202	-10.8596
TRPC3	0	0.18555	0.000538939	-10.8576
ACOT4	0	0.185348	0.000539524	-10.856
CD160	0	0.185235	0.000539855	-10.8551
LOC440461	0	0.184108	0.000543161	-10.8463
KIAA1549L	0	0.182222	0.000548781	-10.8315
NKAPL	0	0.182003	0.000549442	-10.8297
MBOAT4	0	0.181893	0.000549773	-10.8289
ITGA2B	0	0.181457	0.000551095	-10.8254
STON1	0	0.181348	0.000551426	-10.8245
MROH8	0	0.181274	0.000551652	-10.824
PSG7	0	0.180914	0.000552748	-10.8211
TNF	0	0.18059	0.00055374	-10.8185
VTN	0	0.180375	0.000554401	-10.8168
BTBD17	0	0.180267	0.000554732	-10.8159
TFDP3	0	0.180053	0.000555393	-10.8142
CYP2D7P	0	0.180053	0.000555393	-10.8142
B3GALT4	0	0.179412	0.000557376	-10.8091
MSC	0	0.178882	0.000559029	-10.8048
SPAG8	0	0.17783	0.000562335	-10.7963
QPCT	0	0.177621	0.000562996	-10.7946
LOC145837	0	0.177413	0.000563658	-10.7929
CYP4F12	0	0.176876	0.000565369	-10.7885
RHOH	0	0.176454	0.00056672	-10.7851
LOC284344	0	0.175763	0.000568947	-10.7794
MTRNR2L5	0	0.174044	0.000574567	-10.7652
AC093375.1	0	0.173247	0.000577212	-10.7586
SCARF2	0	0.173197	0.000577377	-10.7582
C4orf26	0	0.173147	0.000577542	-10.7578
FLJ37035	0	0.172851	0.000578534	-10.7553
LINC00222	0	0.172555	0.000579526	-10.7528
ANKRD20A4	0	0.172015	0.000581344	-10.7483
ARHGAP15	0	0.171966	0.000581509	-10.7479
CHRD	0	0.17182	0.000582005	-10.7467
SIRPB1	0	0.171673	0.000582501	-10.7455
GLIPR1L2	0	0.168647	0.000592955	-10.7198
SERPING1	0	0.168315	0.000594124	-10.7169
CACNA1C-AS1	0	0.168236	0.000594403	-10.7163
TM4SF18	0	0.167846	0.000595785	-10.7129
CERKL	0	0.16777	0.000596056	-10.7123
TINAG	0	0.167677	0.000596386	-10.7115
ZG16	0	0.167398	0.000597378	-10.7091
LOC100652770	0	0.16666	0.000600023	-10.7027
MKRN9P	0	0.165656	0.000603659	-10.694
SMTNL2	0	0.165639	0.000603723	-10.6938
KRT8P41	0	0.165475	0.00060432	-10.6924
KLHL38	0	0.164934	0.000606304	-10.6877
APOBEC3G	0	0.164934	0.000606304	-10.6877
CDC42P3	0	0.164754	0.000606965	-10.6861
RNF157-AS1	0	0.164575	0.000607626	-10.6845
PNLDC1	0	0.164217	0.000608948	-10.6814
ZNF404	0	0.164217	0.000608948	-10.6814
BTBD16	0	0.163684	0.000610932	-10.6767
ASCL2	0	0.163596	0.000611263	-10.6759
TTYH1	0	0.162803	0.000614238	-10.6689
HMGN2P46	0	0.162716	0.000614568	-10.6681
CXXC4	0	0.162687	0.000614679	-10.6679
SLC22A31	0	0.162628	0.000614899	-10.6674
KLHL33	0	0.162366	0.000615891	-10.665
SPDEF	0	0.162105	0.000616883	-10.6627
TBC1D26	0	0.161845	0.000617874	-10.6604
DLX6	0	0.161327	0.000619858	-10.6558
DNAJB13	0	0.161327	0.000619858	-10.6558
KRT83	0	0.161327	0.000619858	-10.6558
CLCNKB	0	0.161324	0.000619872	-10.6557
RDH12	0	0.16107	0.00062085	-10.6535
FPR2	0	0.160686	0.000622332	-10.65
TMEM71	0	0.159745	0.000625998	-10.6416
LBP	0	0.159709	0.000626139	-10.6412
LINC01132	0	0.159498	0.000626966	-10.6393
RFPL4B	0	0.159205	0.000628123	-10.6367
MATN4	0	0.159121	0.000628453	-10.6359
GLDC	0	0.158828	0.00062961	-10.6333
LRRC38	0	0.158537	0.000630768	-10.6306
C11orf16	0	0.157464	0.000635065	-10.6208
KIAA1683	0	0.157423	0.000635231	-10.6204
CXorf67	0	0.1573	0.000635726	-10.6193
TCP11	0	0.156811	0.00063771	-10.6148
PRSS8	0	0.155922	0.000641346	-10.6066
GCNT7	0	0.155761	0.000642007	-10.6051
MAGEB6	0	0.155202	0.000644322	-10.5999
DPP4	0	0.155122	0.000644652	-10.5992
SYN2	0	0.15441	0.000647628	-10.5925
LPAR4	0	0.154202	0.000648502	-10.5906
LNX1-AS2	0	0.154174	0.000648619	-10.5903
LOC100505795	0	0.154095	0.00064895	-10.5896
FMR1-AS1	0	0.153805	0.000650174	-10.5869
LINC00551	0	0.153782	0.000650272	-10.5867
LRRC71	0	0.15347	0.000651595	-10.5837
ZP1	0	0.153392	0.000651925	-10.583
FAM212B-AS1	0	0.153081	0.000653248	-10.5801
LINC00616	0	0.152927	0.000653909	-10.5786
FLJ30679	0	0.152772	0.00065457	-10.5772
ACTG1P4	0	0.152541	0.000655562	-10.575
PATE4	0	0.15231	0.000656554	-10.5728
SULT2A1	0	0.152234	0.000656884	-10.5721
KRT12	0	0.151852	0.000658537	-10.5684
PRODH	0	0.151776	0.000658868	-10.5677
VSNL1	0	0.150867	0.000662835	-10.5591
KLHL10	0	0.150567	0.000664157	-10.5562
DLG2	0	0.150398	0.000664901	-10.5546
LOC440173	0	0.150044	0.000666471	-10.5512
TUBB2B	0	0.149821	0.000667463	-10.549
PPM1E	0	0.149697	0.000668014	-10.5478
HMCN1	0	0.149484	0.000668969	-10.5458
GIPR	0	0.149451	0.000669116	-10.5455
AADAT	0	0.14884	0.000671863	-10.5395
LINC00479	0	0.148789	0.000672091	-10.5391
TFAP2D	0	0.148279	0.000674406	-10.5341
MIR646HG	0	0.148061	0.000675397	-10.532
KLHL32	0	0.147906	0.000676105	-10.5305
RUNDC3A	0	0.147772	0.00067672	-10.5292
ROR2	0	0.147663	0.000677215	-10.5281
CPNE9	0	0.147627	0.000677381	-10.5277
LOC100507140	0	0.147555	0.000677711	-10.527
KRT79	0	0.146413	0.000683001	-10.5158
IGSF5	0	0.146413	0.000683001	-10.5158
FOXD4L1	0	0.146342	0.000683331	-10.5151
TMEM35	0	0.14613	0.000684323	-10.513
TMEM25	0	0.145707	0.000686308	-10.5089
LINC00324	0	0.144455	0.000692257	-10.4964
EIF1B-AS1	0	0.144386	0.000692588	-10.4957
WNT5B	0	0.144145	0.000693744	-10.4933
SMCO3	0	0.143768	0.000695563	-10.4895
LOC100653515	0	0.143632	0.000696224	-10.4882
AK8	0	0.143632	0.000696225	-10.4882
ITGB7	0	0.143632	0.000696225	-10.4882
LOC100505716	0	0.14336	0.000697547	-10.4854
HIPK1-AS1	0	0.142886	0.000699861	-10.4806
PP2D1	0	0.142013	0.000704159	-10.4718
GLIS3	0	0.141656	0.000705934	-10.4682
GNG12-AS1	0	0.141615	0.000706142	-10.4678
TMPRSS11E	0	0.141615	0.000706142	-10.4678
LOC101929173	0	0.141416	0.000707134	-10.4657
MSX2P1	0	0.139976	0.000714407	-10.451
CCDC151	0	0.139911	0.000714738	-10.4503
GSDMA	0	0.139782	0.000715399	-10.449
TMEM75	0	0.139718	0.000715729	-10.4483
USH1C	0	0.139684	0.000715901	-10.448
CDK15	0	0.139485	0.000716921	-10.4459
LOC102723927	0	0.139396	0.000717382	-10.445
HCG22	0	0.139331	0.000717713	-10.4443
LINC00269	0	0.139203	0.000718374	-10.443
TFAP2E	0	0.138312	0.000723002	-10.4337
LINC00528	0	0.137997	0.000724655	-10.4304
CASC1	0	0.137015	0.000729845	-10.4201
CYTIP	0	0.136873	0.000730606	-10.4186
LINC00612	0	0.136873	0.000730606	-10.4186
STEAP2	0	0.136758	0.000731216	-10.4174
EPS8L3	0	0.135767	0.000736557	-10.4069
MAN1C1	0	0.135645	0.000737218	-10.4056
HNF4A	0	0.135627	0.000737317	-10.4054
SLC28A3	0	0.134757	0.000742078	-10.3961
ZSCAN4	0	0.134679	0.000742507	-10.3953
C2orf66	0	0.134082	0.000745813	-10.3889
LINC00943	0	0.133904	0.000746805	-10.387
STMN4	0	0.133845	0.000747135	-10.3863
LOC400863	0	0.133667	0.000748127	-10.3844
PCDHB16	0	0.13349	0.000749119	-10.3825
RASGEF1B	0	0.133314	0.000750111	-10.3806
LINC00184	0	0.133255	0.000750441	-10.38
FBLN7	0	0.131574	0.000760029	-10.3617
FBXO47	0	0.131403	0.00076102	-10.3598
MIR210HG	0	0.131345	0.000761351	-10.3592
LOC100130357	0	0.131232	0.000762012	-10.3579
SPTSSB	0	0.131175	0.000762343	-10.3573
KRT3	0	0.130947	0.000763665	-10.3548
SLC26A9	0	0.130919	0.00076383	-10.3545
TDRD10	0	0.129768	0.000770608	-10.3417
FAM109B	0	0.129712	0.000770938	-10.3411
LOC101928053	0	0.129545	0.00077193	-10.3392
LDLRAD2	0	0.129213	0.000773913	-10.3355
B3GALT5	0	0.129178	0.000774126	-10.3351
MAG	0	0.128021	0.00078112	-10.3222
ANGPTL5	0	0.12774	0.000782839	-10.319
IGSF9B	0	0.127149	0.000786476	-10.3123
NACAD	0	0.127069	0.000786972	-10.3114
FAM13A-AS1	0	0.12683	0.000788459	-10.3087
DMGDH	0	0.125932	0.000794079	-10.2984
SLC44A4	0	0.125781	0.000795034	-10.2967
LRRC37A	0	0.125723	0.000795402	-10.296
UTS2B	0	0.125618	0.000796063	-10.2948
IL1R1	0	0.125533	0.000796601	-10.2939
C19orf57	0	0.124995	0.00080003	-10.2877
PCDHGA1	0	0.124944	0.000800361	-10.2871
PCDHGB2	0	0.124944	0.000800361	-10.2871
LCP2	0	0.124892	0.000800691	-10.2865
FCGR2A	0	0.124686	0.000802014	-10.2841
HAVCR2	0	0.124481	0.000803336	-10.2817
AOC1	0	0.124174	0.00080532	-10.2782
PCDHGC4	0	0.123869	0.000807303	-10.2746
LOC101927623	0	0.123869	0.000807303	-10.2746
N4BP2L2-IT2	0	0.123717	0.000808295	-10.2728
PCYT1B	0	0.123641	0.000808796	-10.2719
SLC1A7	0	0.123321	0.000810893	-10.2682
M1AP	0	0.122606	0.000815619	-10.2598
CAMK1G	0	0.122465	0.00081656	-10.2582
PTPRC	0	0.122316	0.000817551	-10.2564
ANKUB1	0	0.122316	0.000817551	-10.2564
ZNF521	0	0.121701	0.000821684	-10.2491
DRC1	0	0.121433	0.000823502	-10.2459
HSPA7	0	0.121335	0.000824163	-10.2448
ACSBG2	0	0.121044	0.000826147	-10.2413
SHF	0	0.120995	0.000826477	-10.2407
GP1BA	0	0.120947	0.000826808	-10.2402
APOBEC3D	0	0.12085	0.000827469	-10.239
ACKR4	0	0.120754	0.00082813	-10.2379
MPPED1	0	0.12061	0.000829122	-10.2361
SLC22A11	0	0.120417	0.000830444	-10.2338
FAM90A1	0	0.120226	0.000831767	-10.2315
PPFIA4	0	0.119916	0.000833916	-10.2278
LOC389602	0	0.119278	0.000838379	-10.2201
CTNNA2	0	0.119257	0.000838522	-10.2199
SIRPB2	0	0.119137	0.00083937	-10.2184
SLA	0	0.118152	0.000846367	-10.2064
GATM	0	0.116972	0.000854908	-10.1919
LRMP	0	0.116702	0.000856881	-10.1886
DNALI1	0	0.116208	0.000860528	-10.1825
BSN-AS2	0	0.116208	0.000860528	-10.1825
LOC440600	0	0.11594	0.000862512	-10.1792
FOXJ1	0	0.114971	0.000869785	-10.1671
ZFP42	0	0.114319	0.000874744	-10.1589
USP6	0	0.113846	0.00087838	-10.1529
IRF8	0	0.113675	0.000879702	-10.1507
TMEM200A	0	0.113251	0.000882997	-10.1453
CPEB1	0	0.113245	0.000883039	-10.1452
HEY2	0	0.113207	0.000883339	-10.1447
CROCCP3	0	0.112701	0.000887306	-10.1383
STAR	0	0.112241	0.000890943	-10.1324
GSDMC	0	0.111455	0.000897224	-10.1222
MAP4K1	0	0.111455	0.000897224	-10.1222
TRPM6	0	0.111283	0.00089861	-10.12
ADAM32	0	0.110924	0.000901522	-10.1154
NRON	0	0.110802	0.000902513	-10.1138
BANK1	0	0.110714	0.000903232	-10.1126
VIL1	0	0.110478	0.000905158	-10.1095
PIGZ	0	0.110438	0.000905489	-10.109
DUOX1	0	0.110256	0.000906976	-10.1066
LINC01447	0	0.109558	0.000912762	-10.0975
LINC00670	0	0.10932	0.000914745	-10.0943
LOC100129055	0	0.109005	0.00091739	-10.0902
OR51E2	0	0.108614	0.000920696	-10.085
CCDC33	0	0.108536	0.000921357	-10.084
CYP3A4	0	0.108458	0.000922018	-10.0829
GLIS1	0	0.107418	0.000930944	-10.069
CHRM1	0	0.107151	0.000933258	-10.0654
SLCO1C1	0	0.107039	0.000934235	-10.0639
CYP4F3	0	0.106845	0.000935938	-10.0613
PCDP1	0	0.10651	0.000938878	-10.0568
SLC6A12	0	0.106392	0.000939919	-10.0552
BTN1A1	0	0.106099	0.000942515	-10.0512
GRIK4	0	0.106043	0.000943011	-10.0504
PDGFRB	0	0.105876	0.000944498	-10.0482
ZNF345	0	0.105503	0.000947836	-10.0431
ATP6V0A4	0	0.105395	0.000948808	-10.0416
HSPB7	0	0.104595	0.000956069	-10.0306
PLIN1	0	0.104559	0.0009564	-10.0301
GABBR2	0	0.104523	0.00095673	-10.0296
ANKRD18DP	0	0.104487	0.000957061	-10.0291
KCTD19	0	0.104306	0.000958714	-10.0266
PRICKLE2-AS3	0	0.104055	0.000961028	-10.0231
NKAIN1	0	0.103521	0.000965987	-10.0157
CDH16	0	0.1024	0.000976566	-10
LRRC4B	0	0.102296	0.000977557	-9.99853
LGR6	0	0.102186	0.000978604	-9.99699
UGDH-AS1	0	0.101951	0.000980863	-9.99366
ELMOD1	0	0.101951	0.000980863	-9.99366
ERBB4	0	0.101891	0.000981442	-9.99281
PDE6C	0	0.101882	0.000981525	-9.99269
KLHL13	0	0.10188	0.000981545	-9.99266
LINC00482	0	0.101848	0.000981855	-9.9922
SLC17A7	0	0.101643	0.000983839	-9.98929
RBFOX3	0	0.101167	0.000988467	-9.98252
SPDYE3	0	0.101133	0.000988797	-9.98204
CHFR	0	0.100762	0.000992435	-9.97674
MACC1	0	0.100295	0.000997062	-9.97003
NEUROD2	0	0.0997654	0.00100235	-9.9624
CALHM1	0	0.0989819	0.00101029	-9.95102
ZFHX2	0	0.098831	0.00101183	-9.94882
HAS2	0	0.0984023	0.00101624	-9.94255
TRIM22	0	0.0982425	0.00101789	-9.9402
LOC648691	0	0.0979245	0.0010212	-9.93553
CLDN18	0	0.0979085	0.00102136	-9.93529
PAX3	0	0.097357	0.00102715	-9.92714
TP53AIP1	0	0.0967654	0.00103343	-9.91835
CYP1A2	0	0.0967345	0.00103376	-9.91789
UNC5CL	0	0.0967035	0.00103409	-9.91742
LRFN1	0	0.09658	0.00103541	-9.91558
LOC101927901	0	0.0964876	0.0010364	-9.9142
SLC2A14	0	0.0964371	0.00103695	-9.91344
RASGEF1A	0	0.0955983	0.00104604	-9.90084
GRIN3B	0	0.0951222	0.00105128	-9.89364
DERL3	0	0.0950027	0.0010526	-9.89183
NAALAD2	0	0.094646	0.00105657	-9.8864
LRRC37A6P	0	0.0937368	0.00106682	-9.87247
DACT1	0	0.0932226	0.0010727	-9.86454
CTCFL	0	0.0931459	0.00107358	-9.86335
ANKRD6	0	0.0931258	0.00107382	-9.86304
CORO2B	0	0.0927719	0.00107791	-9.85754
UROC1	0	0.0926458	0.00107938	-9.85558
TMPRSS4	0	0.0924355	0.00108184	-9.8523
ANP32A-IT1	0	0.092194	0.00108467	-9.84853
PCDH12	0	0.092194	0.00108467	-9.84853
UBA7	0	0.0921098	0.00108566	-9.84721
NUTM2A	0	0.0919978	0.00108698	-9.84545
FAM184A	0	0.0919418	0.00108764	-9.84458
AK7	0	0.0916632	0.00109095	-9.8402
INHBC	0	0.0916355	0.00109128	-9.83976
TMEM106A	0	0.0913587	0.00109459	-9.8354
LOC100128682	0	0.0913311	0.00109492	-9.83496
TCAM1P	0	0.0911934	0.00109657	-9.83279
GAL3ST3	0	0.091111	0.00109756	-9.83148
DUXA	0	0.0904031	0.00110616	-9.82023
ITGA7	0	0.090318	0.0011072	-9.81887
PYGM	0	0.0902412	0.00110814	-9.81764
ATP1A3	0	0.0891649	0.00112152	-9.80033
MYH14	0	0.0891114	0.00112219	-9.79947
PTPN22	0	0.0889503	0.00112422	-9.79686
DLL4	0	0.088447	0.00113062	-9.78867
ZNF705E	0	0.0879072	0.00113756	-9.77984
DSCAML1	0	0.0876906	0.00114037	-9.77628
LOC613037	0	0.087551	0.00114219	-9.77398
LOC440416	0	0.0871976	0.00114682	-9.76815
SOWAHA	0	0.0870721	0.00114847	-9.76607
CNKSR2	0	0.0870205	0.00114915	-9.76521
CECR1	0	0.0867041	0.00115335	-9.75996
BTNL9	0	0.0864253	0.00115707	-9.75531
AKR1C2	0	0.086302	0.00115872	-9.75325
FLJ44511	0	0.0862774	0.00115905	-9.75284
USH1G	0	0.0860565	0.00116203	-9.74914
LINC01391	0	0.0854971	0.00116963	-9.73973
FAM26E	0	0.0854729	0.00116996	-9.73932
GTF2IRD2	0	0.0844233	0.00118451	-9.7215
PIWIL1	0	0.0842352	0.00118715	-9.71828
SORBS2	0	0.083693	0.00119484	-9.70896
ZPLD1	0	0.0835835	0.00119641	-9.70707
B3GNT7	0	0.0834451	0.00119839	-9.70468
SLC9A9	0	0.0833991	0.00119905	-9.70389
SPACA6P-AS	0	0.0832843	0.00120071	-9.7019
NCKAP5	0	0.0831698	0.00120236	-9.69992
DKK2	0	0.0831698	0.00120236	-9.69992
TNFRSF1B	0	0.0831241	0.00120302	-9.69912
MMP24	0	0.082557	0.00121129	-9.68925
ADAMTSL3	0	0.0824782	0.00121244	-9.68787
NOS3	0	0.0822874	0.00121525	-9.68453
PRLR	0	0.0820494	0.00121878	-9.68035
GUCY2C	0	0.0818643	0.00122153	-9.67709
NRG2	0	0.0812486	0.00123079	-9.6662
NCALD	0	0.0808145	0.0012374	-9.65847
ARL11	0	0.0804491	0.00124302	-9.65193
C2orf88	0	0.0797905	0.00125328	-9.64007
LOC100130705	0	0.0795395	0.00125724	-9.63553
TREML2	0	0.0791234	0.00126385	-9.62796
LOC101928940	0	0.0789581	0.00126649	-9.62494
ROBO4	0	0.0788347	0.00126848	-9.62269
HAL	0	0.0787116	0.00127046	-9.62043
HAP1	0	0.0783852	0.00127575	-9.61444
RUNX3	0	0.0781565	0.00127948	-9.61022
STC1	0	0.0780213	0.0012817	-9.60772
GRIN1	0	0.0774619	0.00129096	-9.59734
SLC17A6	0	0.0771261	0.00129658	-9.59108
GBP5	0	0.0767154	0.00130352	-9.58337
FAM65C	0	0.0762854	0.00131087	-9.57526
NCMAP	0	0.0758117	0.00131906	-9.56628
TLR10	0	0.0758117	0.00131906	-9.56628
MTUS2	0	0.0757927	0.00131939	-9.56591
ZNF658	0	0.0751525	0.00133063	-9.55368
TMEM47	0	0.0746149	0.00134022	-9.54332
LOC101928539	0	0.0744129	0.00134385	-9.53941
AEBP1	0	0.0740305	0.00135079	-9.53198
MTTP	0	0.0739581	0.00135212	-9.53056
PACSIN1	0	0.0738489	0.00135412	-9.52843
CD163	0	0.073652	0.00135774	-9.52458
DNAH17-AS1	0	0.0735624	0.00135939	-9.52283
DCDC2	0	0.0735445	0.00135972	-9.52247
ITGAX	0	0.0732063	0.001366	-9.51582
LOC730668	0	0.0726787	0.00137592	-9.50539
MYO1F	0	0.0724871	0.00137956	-9.50158
BMS1P5	0	0.0720898	0.00138716	-9.49365
EDAR	0	0.0717818	0.00139311	-9.48747
SRL	0	0.0717818	0.00139311	-9.48747
MYBPC3	0	0.0717308	0.0013941	-9.48645
TG	0	0.0715695	0.00139724	-9.4832
AXIN2	0	0.0714765	0.00139906	-9.48133
GPR173	0	0.0711571	0.00140534	-9.47486
TLR5	0	0.0708902	0.00141063	-9.46944
RBP3	0	0.070741	0.00141361	-9.4664
SPATA18	0	0.0703462	0.00142154	-9.45833
LINC00639	0	0.0702482	0.00142352	-9.45632
CD209	0	0.0702156	0.00142419	-9.45565
GIPC3	0	0.0700692	0.00142716	-9.45264
CYBB	0	0.0700529	0.00142749	-9.4523
TEK	0	0.0699072	0.00143047	-9.4493
ADAMTS4	0	0.0698266	0.00143212	-9.44763
RGAG4	0	0.06973	0.0014341	-9.44564
CDH12	0	0.0696176	0.00143642	-9.44331
CNGB3	0	0.0695856	0.00143708	-9.44265
LOC100506834	0	0.0689354	0.00145063	-9.4291
CYP19A1	0	0.0686694	0.00145625	-9.42352
PCDHB9	0	0.068576	0.00145824	-9.42156
C10orf105	0	0.0672993	0.0014859	-9.39445
LOC100506258	0	0.0672496	0.001487	-9.39338
GPR65	0	0.0668927	0.00149493	-9.3857
RNF157	0	0.0663207	0.00150783	-9.37332
SEC31B	0	0.0655873	0.00152469	-9.35727
RAPGEF4-AS1	0	0.0654596	0.00152766	-9.35446
DACH1	0	0.06529	0.00153163	-9.35072
RNF150	0	0.0648978	0.00154088	-9.34203
ABAT	0	0.0644762	0.00155096	-9.33262
SEMA3G	0	0.0643593	0.00155378	-9.33
KGFLP2	0	0.0642636	0.00155609	-9.32786
MRO	0	0.0641691	0.00155838	-9.32574
ANKRD62	0	0.0639106	0.00156469	-9.31991
MAPK4	0	0.0638701	0.00156568	-9.319
TDRD9	0	0.0634947	0.00157494	-9.31049
USP32P2	0	0.0633484	0.00157857	-9.30716
DNAH12	0	0.0631764	0.00158287	-9.30324
PDE4C	0	0.0627576	0.00159343	-9.29365
CACNA2D2	0	0.062144	0.00160917	-9.27947
NAALADL2	0	0.0615816	0.00162386	-9.26635
LRRC9	0	0.061544	0.00162485	-9.26547
RASGRP1	0	0.0614814	0.00162651	-9.26401
MAST1	0	0.061444	0.0016275	-9.26313
TRIM9	0	0.0614065	0.00162849	-9.26225
PIK3C2G	0	0.0609856	0.00163973	-9.25233
ACE	0	0.0608752	0.00164271	-9.24971
ZFP3	0	0.0605583	0.0016513	-9.24218
ANGPT2	0	0.0601369	0.00166287	-9.23211
DISP2	0	0.060113	0.00166353	-9.23153
PARM1	0	0.0598513	0.00167081	-9.22524
SCUBE3	0	0.0591376	0.00169097	-9.20793
GPR111	0	0.0590107	0.00169461	-9.20483
EFCAB5	0	0.0589417	0.00169659	-9.20314
LINC00869	0	0.0586901	0.00170387	-9.19697
INPP5D	0	0.0582942	0.00171544	-9.18721
RIC3	0	0.0580815	0.00172172	-9.18194
ZNF772	0	0.0571164	0.00175081	-9.15776
GOLGA8N	0	0.0567627	0.00176172	-9.1488
KCNJ2	0	0.056162	0.00178056	-9.13345
PDE7B	0	0.0561516	0.00178089	-9.13318
GPLD1	0	0.0552895	0.00180866	-9.11086
ADAMTS7	0	0.0550981	0.00181494	-9.10586
ABCA8	0	0.0529934	0.00188703	-9.04967
SORCS3	0	0.0525428	0.00190321	-9.03735
PRELP	0	0.0520724	0.0019204	-9.02438
FAM71F2	0	0.0520097	0.00192272	-9.02264
CCDC144A	0	0.0519026	0.00192668	-9.01966
SGSM1	0	0.0519026	0.00192668	-9.01966
TRPM2	0	0.0514787	0.00194255	-9.00783
LRRC15	0	0.0514174	0.00194487	-9.00611
TUB	0	0.0511131	0.00195644	-8.99755
CUBN	0	0.0506978	0.00197247	-8.98578
KLB	0	0.0497596	0.00200966	-8.95883
LOC101927666	0	0.0494828	0.0020209	-8.95078
ESR1	0	0.0490787	0.00203754	-8.93895
SLC25A53	0	0.0487335	0.00205198	-8.92877
PCDHA9	0	0.0473526	0.00211181	-8.8873
SLC6A17	0	0.0472491	0.00211644	-8.88414
GPR98	0	0.0471411	0.00212129	-8.88084
CSMD3	0	0.0464795	0.00215149	-8.86045
MYH7B	0	0.0461815	0.00216537	-8.85117
PDGFRA	0	0.0460129	0.0021733	-8.84589
GRM1	0	0.045337	0.0022057	-8.82455
FER1L4	0	0.0450601	0.00221926	-8.81571
DRP2	0	0.0442558	0.00225959	-8.78972
SRCIN1	0	0.0429062	0.00233067	-8.74504
TTBK1	0	0.0424367	0.00235645	-8.72917
MYT1L	0	0.0423891	0.0023591	-8.72755
RGPD4	0	0.0421763	0.002371	-8.72029
SLC4A4	0	0.0418002	0.00239233	-8.70737
OPRM1	0	0.0415898	0.00240443	-8.70009
KIF26B	0	0.0415107	0.00240902	-8.69734
PKDREJ	0	0.0394894	0.00253233	-8.62532
SLIT1	0	0.0392079	0.00255051	-8.615
GRIN3A	0	0.0389253	0.00256902	-8.60456
ADAMTSL1	0	0.0385729	0.00259249	-8.59144
AFF3	0	0.0375976	0.00265974	-8.5545
NOTCH3	0	0.0374785	0.0026682	-8.54992
SCN5A	0	0.0370885	0.00269626	-8.53483
SLITRK4	0	0.0361334	0.00276752	-8.49719
PROX1	0	0.0355869	0.00281002	-8.4752
CACNA1A	0	0.0354761	0.0028188	-8.4707
ACAN	0	0.0354078	0.00282424	-8.46792
MUC2	0	0.0350833	0.00285036	-8.45464
ZNF780B	0	0.0349133	0.00286424	-8.44763
COL19A1	0	0.0346692	0.00288441	-8.43751
LINC01206	0	0.031651	0.00315946	-8.30611
SGCD	0	0.0310468	0.00322095	-8.2783
UNC5C	0	0.0306225	0.00326558	-8.25845
GPR112	0	0.030459	0.0032831	-8.25073
COL4A4	0	0.0292514	0.00341864	-8.19236
FRY	0	0.0287318	0.00348046	-8.16651
KCNQ3	0	0.0284364	0.00351661	-8.1516
PLEKHG4B	0	0.0262691	0.00380675	-8.03722
XIST	0	0.0256738	0.00389502	-8.00415
XIRP2	0	0.0251518	0.00397585	-7.97452
CSMD2	0	0.0234496	0.00426447	-7.87342
PLXNA4	0	0.0231597	0.00431785	-7.85547
PKHD1L1	0	0.0215801	0.00463389	-7.75356
KSR2	0	0.0177851	0.00562269	-7.47452
EEF1A2	0.803621	20.6482	0.0389197	-4.68336
WFDC2	0.569918	12.8264	0.0444333	-4.49221
LOC100507002	0.460819	10.371	0.0444333	-4.49221
COL9A3	0.132202	2.85133	0.0463652	-4.43081
CALHM3	0.195262	4.0283	0.0484727	-4.36668
CREB3L3	0.123355	2.54484	0.0484727	-4.36668
PGF	0.169064	3.0122	0.0561263	-4.15518
SRPX	0.187251	3.16065	0.0592444	-4.07718
BDH2	0.11047	1.86466	0.0592444	-4.07718
MYL9	0.269485	4.09163	0.0658625	-3.9244
NR5A2	0.0695269	1.04316	0.06665	-3.90725
JMJD7	0.474373	6.67254	0.0710933	-3.81414
FBLN5	0.367535	5.05488	0.072709	-3.78172
TNNC1	0.463468	6.08454	0.0761714	-3.71461
SYCE2	0.345738	4.53895	0.0761714	-3.71461
TINCR	0.174695	2.21153	0.0789925	-3.66214
MAN1A1	0.0641682	0.782246	0.0820307	-3.60769
VWA5A	0.173613	2.11644	0.0820307	-3.60769
ANXA10	0.222926	2.71759	0.0820307	-3.60769
CCDC28B	0.367815	4.48387	0.0820307	-3.60769
ARRB1	0.0430213	0.524453	0.0820307	-3.60769
MUC16	0.00736201	0.0897469	0.0820307	-3.60769
ANPEP	0.441882	5.22104	0.0846349	-3.5626
CITED4	0.499727	5.85764	0.0853119	-3.55111
LOC100506860	1.02188	11.8185	0.0864648	-3.53174
SRGN	7.45984	85.0578	0.0877031	-3.51123
TJP3	0.112578	1.26682	0.0888666	-3.49221
F8	0.392729	4.0798	0.096262	-3.37689
NDRG2	0.178145	1.83758	0.0969454	-3.36668
RRAGD	0.0654839	0.675472	0.0969454	-3.36668
FSIP1	0.114672	1.18286	0.0969454	-3.36668
SYTL2	0.318579	3.2788	0.0971633	-3.36344
LINC00052	1.4449	14.2268	0.101562	-3.29957
ADAMTSL4	0.40051	3.83083	0.104549	-3.25775
METTL7B	0.220337	2.06618	0.10664	-3.22918
GJC2	0.135478	1.27043	0.10664	-3.22918
CERS4	0.355257	3.33137	0.10664	-3.22918
KHDRBS3	0.32983	3.09293	0.10664	-3.22918
CLGN	0.117814	1.10478	0.10664	-3.22918
LRRN2	0.104718	0.981978	0.10664	-3.22918
ASIC1	0.208594	1.88271	0.110794	-3.17404
KCNN4	0.576024	4.99646	0.115286	-3.11671
STRA6	0.45497	3.86077	0.117844	-3.08505
RAB15	0.0951264	0.80283	0.118489	-3.07718
FMN1	0.0289605	0.244415	0.118489	-3.07718
MB	0.319507	2.69652	0.118489	-3.07718
LOC101927811	0.458853	3.87254	0.118489	-3.07718
KIAA1107	0.0708019	0.597541	0.118489	-3.07718
PXDN	1.04041	8.6476	0.120312	-3.05515
C1orf213	0.136222	1.11209	0.122492	-3.02924
TPRG1	0.370774	2.95535	0.125459	-2.99472
NID2	0.38356	3.05726	0.125459	-2.99472
LINC00460	1.40862	10.8975	0.129261	-2.95165
ZNF585A	2.81256	21.6959	0.129636	-2.94746
ENTPD2	0.31765	2.44872	0.129721	-2.94652
NPR3	0.21658	1.64912	0.13133	-2.92873
MANSC1	0.140433	1.05351	0.1333	-2.90725
TMIE	0.173333	1.30033	0.1333	-2.90725
CHRNA9	0.141728	1.06323	0.1333	-2.90725
KLK11	0.291952	2.19019	0.1333	-2.90725
LOC646626	0.720031	5.40158	0.1333	-2.90725
RBPMS2	0.161772	1.2136	0.1333	-2.90725
CNGB1	0.114652	0.860106	0.1333	-2.90725
CRAT	0.116621	0.874877	0.1333	-2.90725
LOC101559451	0.886191	6.6481	0.1333	-2.90725
LINC00518	0.106883	0.801825	0.1333	-2.90725
ARHGAP28	0.058321	0.437517	0.1333	-2.90725
NMNAT2	0.0614584	0.461053	0.1333	-2.90725
SPP1	0.407547	3.02086	0.134911	-2.88992
GSG1	0.126798	0.934072	0.135747	-2.881
MUC4	0.245428	1.76445	0.139096	-2.84585
CYP24A1	0.493836	3.54941	0.139132	-2.84548
SYNGR1	1.38295	9.84808	0.140428	-2.83209
FAM131C	0.379275	2.66745	0.142187	-2.81414
G0S2	1.33987	9.42332	0.142187	-2.81414
MCAM	2.7107	18.8828	0.143554	-2.80034
2015-09-03	0.13065	0.909545	0.143643	-2.79944
CORIN	0.0643988	0.443629	0.145164	-2.78425
EPGN	0.131555	0.897925	0.14651	-2.77093
EPHA4	0.050815	0.333557	0.152343	-2.71461
TTC39B	0.116713	0.766121	0.152343	-2.71461
ZFP14	0.04305	0.282586	0.152343	-2.71461
GALM	0.129913	0.852767	0.152343	-2.71461
HEYL	0.0784088	0.514687	0.152343	-2.71461
ARSI	0.203709	1.33718	0.152343	-2.71461
FZD10-AS1	0.0877035	0.575699	0.152343	-2.71461
RNASE4	0.258472	1.69665	0.152343	-2.71461
ACSF2	0.416762	2.73569	0.152343	-2.71461
GNGT1	0.513652	3.37169	0.152343	-2.71461
PRKCH	0.50141	3.29133	0.152343	-2.71461
POU2F3	0.341176	2.23953	0.152343	-2.71461
MEX3B	0.0913806	0.599836	0.152343	-2.71461
ESPN	0.0913548	0.599666	0.152343	-2.71461
LINC00312	0.111733	0.733433	0.152343	-2.71461
OLFM1	0.35125	2.24566	0.156413	-2.67657
PLAT	0.425138	2.691	0.157985	-2.66214
COL5A2	0.325832	2.05151	0.158825	-2.65449
MAP2	0.182551	1.14123	0.15996	-2.64422
CPM	0.293418	1.83432	0.15996	-2.64422
DMRT1	0.435518	2.72267	0.15996	-2.64422
PPP1R9A	0.0684774	0.421954	0.162287	-2.62338
CFLAR	1.1025	6.78467	0.162499	-2.6215
MATN3	2.74743	16.8635	0.162922	-2.61775
IQCH	0.395938	2.42837	0.163047	-2.61664
MLLT11	0.597912	3.64444	0.164061	-2.60769
SLC16A14	0.293382	1.78825	0.164061	-2.60769
SNAP25	0.332619	2.02741	0.164061	-2.60769
INHBB	0.704969	4.24976	0.165884	-2.59175
SYT17	0.50613	3.0059	0.168379	-2.57022
PPAP2B	0.585079	3.47478	0.168379	-2.57022
C1orf115	0.325613	1.93381	0.168379	-2.57022
PXYLP1	0.294947	1.75169	0.168379	-2.57022
MMP13	1.18637	7.00875	0.16927	-2.5626
PLBD1	0.173707	0.977346	0.177733	-2.49222
GRID1	0.0551502	0.310298	0.177733	-2.49221
NPAS2	0.0805628	0.45328	0.177733	-2.49221
SGK494	0.0853595	0.480268	0.177733	-2.49221
SLC16A6	0.0842669	0.47412	0.177733	-2.49221
FAM86B1	0.148515	0.835604	0.177733	-2.49221
SALL4	0.0925872	0.520933	0.177733	-2.49221
GPR132	0.111772	0.628875	0.177733	-2.49221
GOLGA2P7	0.177044	0.996121	0.177733	-2.49221
LINC00511	0.142417	0.801294	0.177733	-2.49221
ALPPL2	0.25868	1.45544	0.177733	-2.49221
SNORD36A	4.48019	25.2074	0.177733	-2.49221
TMEM121	0.424718	2.38964	0.177733	-2.49221
MATN1-AS1	0.20865	1.17395	0.177733	-2.49221
RPL32P3	0.310316	1.74597	0.177733	-2.49221
PLAC1	0.859432	4.83552	0.177733	-2.49221
KRT81	4.89771	27.5566	0.177733	-2.49221
ODF3L1	0.274297	1.54331	0.177733	-2.49221
TPPP3	0.304315	1.7122	0.177733	-2.49221
SDHAP3	0.280012	1.57546	0.177733	-2.49221
FBXO16	0.492479	2.77089	0.177733	-2.49221
PPP1R3C	0.125369	0.705376	0.177733	-2.49221
GCNT3	0.145173	0.816801	0.177733	-2.49221
MAP3K7CL	0.235637	1.32579	0.177733	-2.49221
CXCL3	0.279769	1.5741	0.177733	-2.49221
PTPRH	0.190085	1.06949	0.177733	-2.49221
RAB3B	0.100459	0.565223	0.177733	-2.49221
LOC100129534	0.143494	0.807354	0.177733	-2.49221
SCG2	0.125417	0.70565	0.177733	-2.49221
SORBS1	0.119782	0.673944	0.177733	-2.49221
TBKBP1	0.0780294	0.439026	0.177733	-2.49221
SCARA5	0.0777099	0.437228	0.177733	-2.49221
FAM225A	0.055597	0.312811	0.177733	-2.49221
C1QTNF3	0.109199	0.614398	0.177733	-2.49221
LOC100507065	0.595188	3.27491	0.181742	-2.46004
CLDN1	1.40168	7.71118	0.181773	-2.45979
SCNN1A	1.45855	7.75133	0.188167	-2.40991
GPRC5B	0.340148	1.80749	0.188188	-2.40975
TYMSOS	1.44221	7.66365	0.188188	-2.40975
NGEF	0.375743	1.99664	0.188188	-2.40975
FBXO2	2.99472	15.8466	0.188982	-2.40368
CARD16	0.464135	2.39437	0.193844	-2.36703
DPPA2	0.466484	2.40591	0.193891	-2.36668
LOC100130476	1.64243	8.47091	0.193891	-2.36668
RASSF9	0.359213	1.85266	0.193891	-2.36668
DKK3	0.253261	1.3062	0.193891	-2.36668
GNAO1	0.103872	0.533411	0.194731	-2.36044
FBXO32	0.34664	1.73665	0.199603	-2.32479
SPARC	0.284624	1.42348	0.19995	-2.32229
PRKAR2B	1.32166	6.60997	0.19995	-2.32229
C16orf62	0.248516	1.24289	0.19995	-2.32229
APH1B	0.53852	2.66923	0.201751	-2.30935
MPP2	0.449058	2.22487	0.201836	-2.30875
NRBP2	0.346574	1.70622	0.203124	-2.29957
FGF12	0.124998	0.615269	0.203161	-2.29931
CPE	0.797134	3.86209	0.2064	-2.27649
LOC101927482	0.482663	2.33664	0.206563	-2.27535
KRT15	3.68555	17.7741	0.207355	-2.26982
LINC-PINT	0.309374	1.48103	0.208891	-2.25918
CRIP1	6.7484	32.2739	0.209098	-2.25775
NICN1	0.110888	0.519919	0.21328	-2.22918
LIN7B	0.466821	2.18877	0.21328	-2.22918
INPP5J	0.141047	0.661322	0.21328	-2.22918
RIMS3	0.0446222	0.209219	0.21328	-2.22918
CLDN11	0.138034	0.647198	0.21328	-2.22918
ZNF329	0.0945132	0.443142	0.21328	-2.22918
TNFAIP8L3	0.142858	0.669815	0.21328	-2.22918
HYMAI	0.069118	0.324072	0.21328	-2.22918
LIPG	0.233693	1.09571	0.21328	-2.22918
AMZ1	0.0785803	0.368437	0.21328	-2.22918
AGR2	0.328152	1.5386	0.21328	-2.22918
ZNF169	0.272137	1.27596	0.21328	-2.22918
HIST2H2AC	0.738155	3.46097	0.21328	-2.22918
PARD3B	0.0430875	0.202023	0.21328	-2.22918
PPP2R2B	0.186864	0.876144	0.21328	-2.22918
GSTA4	0.481094	2.25569	0.21328	-2.22918
VLDLR	0.095436	0.447468	0.21328	-2.22918
SERPINF2	0.320634	1.50335	0.21328	-2.22918
NYAP1	0.0900289	0.422116	0.21328	-2.22918
C7orf13	0.563694	2.64298	0.21328	-2.22918
HDX	0.0518107	0.242924	0.21328	-2.22918
VAX1	0.163909	0.768518	0.21328	-2.22918
GJB2	0.27665	1.29712	0.21328	-2.22918
FOXA2	0.144679	0.678355	0.21328	-2.22918
LINC00882	1.0699	5.0164	0.21328	-2.22918
HIST1H1E	0.410922	1.92668	0.21328	-2.22918
LOC101928913	0.475072	2.22746	0.21328	-2.22918
SYT12	0.18986	0.890192	0.21328	-2.22918
ATG16L2	0.150384	0.705102	0.21328	-2.22918
LOC643770	0.176753	0.828736	0.21328	-2.22918
RALY-AS1	0.555204	2.60317	0.21328	-2.22918
BOLA2+BOLA2B+LOC388242+LOC613038+SLX1A+SLX1A-SULT1A3+SLX1B+SLX1B-SULT1A4+SULT1A3+SULT1A4	0.246504	1.15578	0.21328	-2.22918
CD200R1	0.146425	0.686538	0.21328	-2.22918
WDFY3-AS2	0.205592	0.963954	0.21328	-2.22918
C8orf31	0.172039	0.806636	0.21328	-2.22918
LINC00520	0.160724	0.753584	0.21328	-2.22918
DNAH2	0.047771	0.223983	0.21328	-2.22918
CEBPA-AS1	0.146558	0.687162	0.21328	-2.22918
IL17RD	0.14797	0.693781	0.21328	-2.22918
LINC01004	0.0342471	0.160574	0.21328	-2.22918
KCNMB4	0.136539	0.640188	0.21328	-2.22918
LOC100288846	0.285716	1.33963	0.21328	-2.22918
CBX3P2	0.225734	1.05839	0.21328	-2.22918
FUT2	0.208853	0.979245	0.21328	-2.22918
MAGI2	0.0480879	0.225469	0.21328	-2.22918
CBX7	0.0814169	0.381737	0.21328	-2.22918
TMOD2	0.0702469	0.329365	0.21328	-2.22918
MAPK13	0.0520616	0.2441	0.21328	-2.22918
LINC00910	0.147244	0.683333	0.215479	-2.21438
MUTYH	1.4364	6.54238	0.219553	-2.18736
PADI1	0.586955	2.67341	0.219553	-2.18736
ZNF365	0.459943	2.08464	0.220634	-2.18027
ASB3	5.10401	23.1334	0.220634	-2.18027
DMD	1.13314	5.11422	0.221566	-2.17419
CCRL2	0.659976	2.97415	0.221904	-2.17199
SH3RF3	0.31995	1.44014	0.222167	-2.17029
S100A4	8.82037	39.5835	0.22283	-2.16599
IFI6	3.08683	13.7495	0.224505	-2.15518
COX6B2	0.775884	3.45597	0.224505	-2.15518
PRKAA2	0.68985	3.04041	0.226893	-2.13991
MAP3K8	0.321182	1.4135	0.227225	-2.13781
MDK	0.862496	3.78855	0.227659	-2.13505
BCORL1	0.135782	0.594197	0.228514	-2.12964
APLP1	0.395472	1.73063	0.228514	-2.12964
SDPR	1.78656	7.63202	0.234088	-2.09488
GLB1L	0.299372	1.26709	0.236268	-2.0815
LEPREL2	0.241538	1.01924	0.236978	-2.07718
CHST2	0.155946	0.658061	0.236978	-2.07718
HOXA2	0.36285	1.53116	0.236978	-2.07718
KCNK2	0.202527	0.854627	0.236978	-2.07718
LOC101926963	0.923046	3.89508	0.236978	-2.07718
C16orf95	0.663731	2.80082	0.236978	-2.07718
TFAMP1	0.290215	1.22465	0.236978	-2.07718
SDC2	0.555364	2.34353	0.236978	-2.07718
PGM5P2	0.327154	1.38053	0.236978	-2.07718
RTN4RL2	0.871821	3.67892	0.236978	-2.07718
LINC00886	0.193332	0.815822	0.236978	-2.07718
IQGAP2	0.160453	0.67203	0.238758	-2.06638
NSG1	0.277125	1.15995	0.238911	-2.06546
CKLF	18.4557	76.7509	0.240463	-2.05612
PADI3	2.83314	11.7656	0.2408	-2.05409
COBL	0.52527	2.16427	0.2427	-2.04275
IPW	3.29889	13.5844	0.242843	-2.0419
MAGIX	0.114836	0.471533	0.243537	-2.03779
SH3PXD2A-AS1	1.27563	5.23337	0.243748	-2.03654
HHAT	2.10063	8.60506	0.244115	-2.03436
TIMP4	1.18521	4.81611	0.246092	-2.02273
CCDC103	0.53912	2.19073	0.246092	-2.02273
LOC100505942	0.872607	3.54585	0.246092	-2.02273
PAIP2B	0.153606	0.624183	0.246092	-2.02273
TBL1X	1.07242	4.34771	0.246664	-2.01938
DAB2	0.710828	2.86624	0.248	-2.01159
HOXA3	1.82676	7.32789	0.249288	-2.00411
MMP15	0.799709	3.20418	0.249583	-2.00241
CBS	0.530217	2.11312	0.250917	-1.99472
SLC16A12	0.714924	2.81572	0.253905	-1.97764
NES	0.290241	1.14311	0.253905	-1.97764
HIVEP3	2.01826	7.94538	0.254017	-1.977
KHDC1L	5.5967	21.9471	0.255009	-1.97138
ARHGEF25	0.159436	0.623445	0.255733	-1.96729
LINC00467	5.10671	19.9531	0.255936	-1.96615
CGN	0.379424	1.4825	0.255936	-1.96615
CTSV	2.48289	9.66595	0.25687	-1.96089
DTNA	0.240093	0.931756	0.257678	-1.95636
ERBB3	0.280158	1.08427	0.258384	-1.95241
LOC101928674	0.150522	0.581022	0.259064	-1.94862
TEX19	1.49957	5.78103	0.259394	-1.94678
PEX11A	1.29406	4.95317	0.261259	-1.93645
RPS26P11	0.583316	2.18798	0.2666	-1.90725
LOC100133669	0.919013	3.44716	0.2666	-1.90725
KIF21B	0.138965	0.521251	0.2666	-1.90725
FLJ42627	0.0451278	0.169272	0.2666	-1.90725
MYO15B	0.034309	0.128691	0.2666	-1.90725
KIF1A	0.0369373	0.13855	0.2666	-1.90725
MICU3	0.0809064	0.303475	0.2666	-1.90725
FOXD2	0.0689997	0.258814	0.2666	-1.90725
DLG4	0.107137	0.401864	0.2666	-1.90725
ARHGEF37	0.066305	0.248706	0.2666	-1.90725
LHFPL5	0.150244	0.563556	0.2666	-1.90725
ANO1	0.0961812	0.36077	0.2666	-1.90725
SLC27A1	0.181885	0.682241	0.2666	-1.90725
PHACTR3	0.165753	0.62173	0.2666	-1.90725
GALNT5	0.103026	0.386443	0.2666	-1.90725
LOC101929524	0.192696	0.722793	0.2666	-1.90725
F2RL2	0.196811	0.738227	0.2666	-1.90725
HSD17B6	0.199366	0.747809	0.2666	-1.90725
SELENBP1	0.205854	0.772147	0.2666	-1.90725
CRMP1	0.119663	0.448849	0.2666	-1.90725
PIWIL2	0.0912047	0.342104	0.2666	-1.90725
FBXO27	0.277841	1.04217	0.2666	-1.90725
SPATA17	0.261193	0.97972	0.2666	-1.90725
C1orf54	0.612094	2.29593	0.2666	-1.90725
HECW2	0.139723	0.524092	0.2666	-1.90725
IGFBP2	0.451468	1.69343	0.2666	-1.90725
ABTB1	0.332379	1.24673	0.2666	-1.90725
RNF208	0.599023	2.2469	0.2666	-1.90725
CTAGE7P	0.114024	0.427697	0.2666	-1.90725
SENCR	0.248516	0.932168	0.2666	-1.90725
CGNL1	0.0446531	0.167491	0.2666	-1.90725
RPRML	0.295127	1.107	0.2666	-1.90725
LOC101927572	0.586498	2.19992	0.2666	-1.90725
ADORA1	0.233411	0.87551	0.2666	-1.90725
MIR3661	105.617	396.163	0.2666	-1.90725
STAG3L2	0.171217	0.642226	0.2666	-1.90725
SDR16C5	0.106215	0.398405	0.2666	-1.90725
ASRGL1	0.137734	0.516633	0.2666	-1.90725
TSPAN8	0.570927	2.14151	0.2666	-1.90725
MYL2	1.16734	4.37861	0.2666	-1.90725
KRTAP4-1	0.4365	1.63729	0.2666	-1.90725
PSTPIP2	1.28005	4.80141	0.2666	-1.90725
FCGRT	0.669011	2.50942	0.2666	-1.90725
SELM	1.86729	7.00408	0.2666	-1.90725
ZNF514	0.201357	0.755277	0.2666	-1.90725
DAPP1	0.658986	2.47182	0.2666	-1.90725
LOC102723703	0.350243	1.31374	0.2666	-1.90725
PRSS22	0.465474	1.74597	0.2666	-1.90725
HESX1	0.274999	1.0315	0.2666	-1.90725
PDK4	0.0871821	0.327015	0.2666	-1.90725
MORF4L2-AS1	0.119472	0.448131	0.2666	-1.90725
PSTPIP1	0.173894	0.652267	0.2666	-1.90725
NLRP10	0.15969	0.598987	0.2666	-1.90725
HTR3A	0.181358	0.680265	0.2666	-1.90725
B4GALNT3	0.093826	0.351936	0.2666	-1.90725
GLP2R	0.194088	0.728011	0.2666	-1.90725
ANKRD29	0.141915	0.532316	0.2666	-1.90725
GBP1	0.105762	0.396706	0.2666	-1.90725
KIF17	0.0812938	0.304928	0.2666	-1.90725
DNAH7	0.0520532	0.195248	0.2666	-1.90725
RASSF4	0.129288	0.484952	0.2666	-1.90725
SLC12A8	0.0936623	0.351322	0.2666	-1.90725
ARC	0.109421	0.410432	0.2666	-1.90725
LOC100128164	0.0534859	0.200623	0.2666	-1.90725
HOXA1	2.27967	8.51717	0.267656	-1.90155
CARD8	2.87919	10.7305	0.268318	-1.89798
CCDC126	2.34789	8.68447	0.270355	-1.88707
KRTAP2-3	6.43633	23.7873	0.270579	-1.88588
HES2	1.13582	4.1894	0.271118	-1.883
ZNF354A	1.64127	6.03793	0.271827	-1.87924
RGS7	3.67157	13.4411	0.27316	-1.87218
ARL17A	0.458887	1.6756	0.273864	-1.86847
ADSSL1	1.27557	4.65367	0.2741	-1.86723
CSRNP3	0.0282003	0.102643	0.274741	-1.86385
TLE2	0.581509	2.11226	0.275302	-1.86091
TSPAN13	5.08791	18.4483	0.275793	-1.85834
DAW1	1.35292	4.89347	0.276474	-1.85478
NPTXR	0.388309	1.4045	0.276474	-1.85478
HSPA12A	0.676491	2.43175	0.278191	-1.84585
PKIB	1.35135	4.85763	0.278191	-1.84585
C6orf99	2.52801	9.00828	0.280631	-1.83325
ALDH1A3	42.5059	150.784	0.281899	-1.82675
CDH1	1.54085	5.46553	0.281922	-1.82663
KCTD17	0.80947	2.85704	0.283325	-1.81947
NR3C2	0.116306	0.410293	0.28347	-1.81873
C14orf132	0.378756	1.33549	0.283608	-1.81803
HSPB11	32.7404	115.258	0.284063	-1.81572
ATL1	0.509665	1.79224	0.284373	-1.81414
KBTBD3	0.33462	1.17669	0.284373	-1.81414
TGFB2	3.59727	12.5971	0.285563	-1.80812
LAPTM5	2.01609	7.02206	0.287107	-1.80034
KIAA1462	0.242797	0.845667	0.287107	-1.80034
HOXB3	0.676255	2.35541	0.287107	-1.80034
ZNF449	0.556298	1.9376	0.287107	-1.80034
ELFN2	0.270065	0.940642	0.287107	-1.80034
EFCAB13	0.220637	0.765794	0.288116	-1.79528
LOC101928784	0.57229	1.9848	0.288336	-1.79418
VIT	0.26041	0.896772	0.290386	-1.78396
KCNJ3	0.213956	0.735657	0.290836	-1.78172
GRPR	0.360955	1.24109	0.290836	-1.78172
LINC00936	0.322789	1.10986	0.290836	-1.78172
MTRNR2L1	0.622329	2.13979	0.290836	-1.78172
RCN3	0.521964	1.7947	0.290836	-1.78172
BTN2A2	0.597839	2.05559	0.290836	-1.78172
CFB	0.368375	1.26661	0.290836	-1.78172
ZNF585B	0.155833	0.535809	0.290836	-1.78172
DLX3	0.371914	1.27878	0.290836	-1.78172
ANKRD44	0.158539	0.545114	0.290836	-1.78172
RORA	0.0923393	0.317496	0.290836	-1.78172
MAOA	0.665724	2.27008	0.29326	-1.76975
HKDC1	4.63443	15.7435	0.294371	-1.76429
FN1	1.79752	6.09483	0.294926	-1.76158
LINC00152	16.9091	57.3265	0.294961	-1.7614
PCSK5	0.846946	2.86004	0.296131	-1.75569
AQP1	0.696072	2.34983	0.296222	-1.75525
ADAM19	0.247031	0.83394	0.296222	-1.75525
GSTM3	1.48507	5.0029	0.296843	-1.75223
RGS2	7.40725	24.8713	0.297823	-1.74747
PDE9A	1.45961	4.88831	0.298592	-1.74375
CRISPLD2	0.49205	1.6479	0.298592	-1.74375
CA12	2.50245	8.25107	0.303288	-1.72124
KCNMB3	0.712082	2.34153	0.30411	-1.71733
NMU	20.9463	68.7474	0.304685	-1.71461
MAML3	0.0910197	0.298733	0.304685	-1.71461
PPARA	0.258965	0.849943	0.304685	-1.71461
GRHL1	0.357918	1.17471	0.304685	-1.71461
ATRNL1	0.469291	1.54025	0.304685	-1.71461
NR4A1	0.27225	0.893545	0.304685	-1.71461
B3GNT4	0.428954	1.40786	0.304685	-1.71461
DAPK2	0.248038	0.814079	0.304685	-1.71461
SH3GL3	0.38265	1.25588	0.304685	-1.71461
SNRPE	21.6856	71.1738	0.304685	-1.71461
ATP6AP1L	0.851118	2.79343	0.304685	-1.71461
FAM84B	3.8843	12.7486	0.304685	-1.71461
SYT8	0.414886	1.36169	0.304685	-1.71461
RASSF10	0.240368	0.788905	0.304685	-1.71461
NTN1	0.216711	0.71126	0.304685	-1.71461
TTYH2	0.476153	1.56277	0.304685	-1.71461
FHAD1	0.253496	0.831992	0.304685	-1.71461
THBS3	0.226984	0.744979	0.304685	-1.71461
CDON	0.400862	1.31566	0.304685	-1.71461
RGCC	0.582263	1.91103	0.304685	-1.71461
ESR2	0.159809	0.524504	0.304685	-1.71461
LINC00239	1.0049	3.29816	0.304685	-1.71461
FAM105A	0.457681	1.50214	0.304685	-1.71461
GRAMD2	0.195974	0.643202	0.304685	-1.71461
CBLC	0.444011	1.45727	0.304685	-1.71461
EPHA1	0.191951	0.629997	0.304685	-1.71461
ZNF738	0.110084	0.361304	0.304685	-1.71461
NDUFC2	18.0595	59.2726	0.304685	-1.71461
ZBED2	0.292849	0.961153	0.304686	-1.71461
CRABP2	38.0126	123.957	0.306659	-1.70529
NOP10	115.765	376.556	0.30743	-1.70167
SLC16A5	2.26519	7.35282	0.308071	-1.69867
CYP26B1	1.34524	4.33025	0.310661	-1.68659
RAB6B	0.406118	1.30571	0.311033	-1.68486
LOC100505549	1.2075	3.88221	0.311033	-1.68486
GAMT	3.28431	10.5551	0.311159	-1.68428
HSPE1	325.378	1038.11	0.313435	-1.67376
TNFRSF11A	0.354399	1.12993	0.313647	-1.67279
UQCRBP1	4.04735	12.9042	0.313647	-1.67279
NPHP1	0.625384	1.99391	0.313647	-1.67279
TLCD2	0.546642	1.74286	0.313647	-1.67279
PDLIM3	0.452417	1.44042	0.314087	-1.67077
ALPP	7.20081	22.895	0.314514	-1.6688
TMEM170B	0.690161	2.19325	0.314675	-1.66806
COX17	41.1796	130.864	0.314675	-1.66806
MRPL33	83.1942	264.218	0.31487	-1.66717
HHLA3	0.717628	2.27435	0.315531	-1.66415
IPCEF1	0.145458	0.45467	0.31992	-1.64422
WNK2	0.123829	0.387062	0.31992	-1.64422
NLRP1	0.179507	0.561099	0.31992	-1.64422
LRRC2	0.188456	0.589072	0.31992	-1.64422
C1orf210	0.707946	2.21288	0.31992	-1.64422
FAM229B	1.11962	3.49968	0.31992	-1.64422
CLDN3	0.759593	2.37432	0.31992	-1.64422
STAG3L5P	2.52011	7.87731	0.31992	-1.64422
LHX6	0.340975	1.06581	0.31992	-1.64422
CLIC3	2.38062	7.44129	0.31992	-1.64422
LINC00478	0.278481	0.870471	0.31992	-1.64422
C12orf56	0.609013	1.90364	0.31992	-1.64422
FOXO6	0.405074	1.26617	0.31992	-1.64422
GRAMD1C	0.304933	0.953154	0.31992	-1.64422
RASD2	0.325613	1.01779	0.31992	-1.64422
EPB41L1	1.70629	5.31099	0.321275	-1.63812
TPD52L1	12.1918	37.8706	0.321932	-1.63517
GEM	1.55983	4.82695	0.323151	-1.62972
SLC44A2	5.16644	15.9551	0.323812	-1.62677
CD22	1.41531	4.36732	0.32407	-1.62562
TNC	0.52512	1.61796	0.324556	-1.62346
JDP2	1.12089	3.45132	0.32477	-1.62251
MAGEB2	16.6089	50.8526	0.326609	-1.61436
SYNE1	0.0955892	0.291321	0.328123	-1.60769
RBM43	0.329661	1.00469	0.328123	-1.60769
METTL7A	0.380618	1.15999	0.328123	-1.60769
MIR4435-1HG	16.4562	50.1362	0.32823	-1.60722
ARHGEF26	2.47204	7.52863	0.328353	-1.60668
CYSTM1	20.2052	61.4949	0.328566	-1.60574
TMA7	20.9011	63.3723	0.329814	-1.60027
EFNA3	1.62916	4.92265	0.330951	-1.59531
TP53I11	1.46898	4.42772	0.331769	-1.59175
PFDN4	48.1704	145.177	0.331805	-1.59159
ATP5E	63.2066	190.076	0.332533	-1.58843
CRLF1	0.894051	2.68283	0.33325	-1.58532
PDGFRL	0.84665	2.54059	0.33325	-1.58532
STK32C	0.761146	2.28401	0.33325	-1.58532
ARL4C	7.8068	23.3961	0.33368	-1.58346
C3orf18	0.464991	1.39104	0.334275	-1.58089
IFITM2	19.8847	59.2546	0.33558	-1.57527
CLDN4	7.04694	20.9809	0.335874	-1.57401
ACBD4	0.638444	1.89674	0.3366	-1.57089
THRB	0.262748	0.780228	0.336758	-1.57022
C6orf141	1.14118	3.38873	0.336758	-1.57022
FA2H	0.797463	2.36806	0.336758	-1.57022
SNAI1	1.13449	3.36887	0.336758	-1.57022
SIPA1L2	0.298311	0.885833	0.336758	-1.57022
ETV1	2.58712	7.67505	0.337082	-1.56883
COX6C	109.626	323.837	0.338522	-1.56268
NTRK2	0.0364905	0.107088	0.340752	-1.55321
NDUFA4	66.3016	194.457	0.340958	-1.55234
SLC35G2	1.56779	4.5943	0.341248	-1.55111
LTBP2	0.301682	0.884056	0.341248	-1.55111
TOX2	2.0736	6.07651	0.341248	-1.55111
FGFR1	2.35295	6.88291	0.341855	-1.54855
LRRC20	1.19916	3.49897	0.342718	-1.54491
ZSCAN2	2.25147	6.54649	0.34392	-1.53985
PAQR8	0.680822	1.97914	0.344	-1.53952
LINC01003	2.26845	6.59434	0.344	-1.53952
MATN2	0.796282	2.31477	0.344	-1.53952
CASC8	2.06646	6.00714	0.344	-1.53952
LOC100996447	2.1636	6.27111	0.345012	-1.53528
GNG5	28.6087	82.815	0.345453	-1.53344
SLC9A7	0.386586	1.11775	0.345859	-1.53174
GLI2	0.619509	1.78749	0.34658	-1.52874
DNER	4.43637	12.7578	0.347739	-1.52392
GLYCTK	0.7163	2.05961	0.347785	-1.52373
MYEOV	4.06017	11.6624	0.348141	-1.52226
PRKG1	0.187747	0.537471	0.349316	-1.51739
TMSB4X	400.012	1144.07	0.349639	-1.51606
ZFAS1	273.062	780.537	0.349839	-1.51524
C11orf74	7.57723	21.6063	0.350695	-1.51171
CARD14	0.124162	0.353954	0.350787	-1.51133
TMEM8B	0.192264	0.547076	0.351439	-1.50865
ABCA1	0.982894	2.79389	0.351802	-1.50717
TDRKH	0.916402	2.5948	0.353169	-1.50157
LOC101927497	0.918988	2.58537	0.355457	-1.49225
ADAMTS15	0.0568312	0.159878	0.355466	-1.49221
MIR4697HG	0.0617012	0.173578	0.355466	-1.49221
FAM19A2	0.0779917	0.219407	0.355466	-1.49221
KIAA1751	0.068487	0.192668	0.355466	-1.49221
LIPE	0.0845984	0.237993	0.355466	-1.49221
PLCH2	0.0666888	0.187609	0.355466	-1.49221
SRMS	0.134294	0.377796	0.355466	-1.49221
SHE	0.104342	0.293536	0.355466	-1.49221
RNF122	0.172315	0.484757	0.355466	-1.49221
SHC4	0.0708019	0.19918	0.355466	-1.49221
RNF144A	0.112415	0.316245	0.355466	-1.49221
SBSPON	0.0849325	0.238933	0.355466	-1.49221
GTSE1-AS1	0.212499	0.597804	0.355466	-1.49221
GJB4	0.113582	0.31953	0.355466	-1.49221
ANKRD36	0.154391	0.434333	0.355466	-1.49221
GMPR	0.21292	0.598987	0.355466	-1.49221
HCG27	0.187543	0.527596	0.355466	-1.49221
MURC	0.208381	0.586218	0.355466	-1.49221
SLC7A7	0.307412	0.864813	0.355466	-1.49221
STX1B	0.0709889	0.199706	0.355466	-1.49221
ST6GALNAC5	0.476241	1.33976	0.355466	-1.49221
SLC44A3	0.138325	0.389136	0.355466	-1.49221
CD1D	0.255808	0.71964	0.355466	-1.49221
DUSP5P1	0.137324	0.38632	0.355466	-1.49221
SERPINI1	0.201398	0.566575	0.355466	-1.49221
MRAS	0.309943	0.871935	0.355466	-1.49221
FAM149A	0.268253	0.754649	0.355466	-1.49221
LINC01023	0.738155	2.07658	0.355466	-1.49221
TCF7	0.11662	0.328075	0.355466	-1.49221
CXCL14	0.163494	0.459942	0.355466	-1.49221
LINC00472	0.307246	0.864345	0.355466	-1.49221
LOC100505921	0.278081	0.782298	0.355466	-1.49221
ZNF862	0.0467701	0.131574	0.355466	-1.49221
HCAR3	0.150947	0.424645	0.355466	-1.49221
LOC102724814	0.334447	0.940867	0.355466	-1.49221
MRPL45P2	0.46214	1.30009	0.355466	-1.49221
PSG2	0.200108	0.562944	0.355466	-1.49221
SLC2A11	0.129301	0.363751	0.355466	-1.49221
GATSL3	0.198874	0.559473	0.355466	-1.49221
SGIP1	0.0687204	0.193325	0.355466	-1.49221
ACVR1C	0.0796566	0.22409	0.355466	-1.49221
C2orf48	0.443096	1.24652	0.355466	-1.49221
C2orf70	0.928269	2.61141	0.355466	-1.49221
FGF5	0.488286	1.37365	0.355466	-1.49221
FAM151B	0.189193	0.532238	0.355466	-1.49221
KCNQ5-IT1	0.572955	1.61184	0.355466	-1.49221
RAET1L	0.402212	1.1315	0.355466	-1.49221
HRCT1	1.01865	2.86568	0.355466	-1.49221
AKNA	0.262148	0.737477	0.355466	-1.49221
DIAPH2	0.194204	0.546337	0.355466	-1.49221
VIM-AS1	1.30702	3.67693	0.355466	-1.49221
PRKG1-AS1	0.543511	1.52901	0.355466	-1.49221
MYRF	0.567059	1.59525	0.355466	-1.49221
FOLR1	1.04252	2.93281	0.355466	-1.49221
LOC100507283	0.110926	0.312058	0.355466	-1.49221
SCN8A	0.112857	0.31749	0.355466	-1.49221
LINC00911	0.81504	2.29288	0.355466	-1.49221
LINC00341	0.342677	0.964022	0.355466	-1.49221
EXOC3L4	0.250154	0.703735	0.355466	-1.49221
VASN	0.80471	2.26381	0.355466	-1.49221
SMIM22	0.59642	1.67785	0.355466	-1.49221
VAC14-AS1	0.149133	0.41954	0.355466	-1.49221
RILP	0.180108	0.506681	0.355466	-1.49221
OVCA2	1.29548	3.64444	0.355466	-1.49221
SNORA67	2.35455	6.62384	0.355466	-1.49221
WFDC21P	1.55833	4.38389	0.355466	-1.49221
CYGB	0.336365	0.946263	0.355466	-1.49221
PBX4	0.396039	1.11414	0.355466	-1.49221
KCNK6	0.485987	1.36718	0.355466	-1.49221
KLK7	0.199316	0.560717	0.355466	-1.49221
KLK8	0.546735	1.53808	0.355466	-1.49221
LOC101929225	0.570422	1.60471	0.355466	-1.49221
ZSWIM3	0.687058	1.93283	0.355466	-1.49221
DNAJC28	0.467494	1.31516	0.355466	-1.49221
LINC00634	0.214192	0.602567	0.355466	-1.49221
CHD5	0.0333823	0.0939114	0.355466	-1.49221
SLC2A1-AS1	0.323869	0.91111	0.355466	-1.49221
HSPA6	0.121634	0.342182	0.355466	-1.49221
SNORD79	7.96478	22.4066	0.355466	-1.49221
RPS10P7	0.936353	2.63415	0.355466	-1.49221
MIR3620	8.16642	22.9738	0.355466	-1.49221
LTBP1	0.734075	2.0651	0.355466	-1.49221
INO80B	3.22574	9.07466	0.355466	-1.49221
DUSP28	0.829771	2.33432	0.355466	-1.49221
CMTM8	2.20563	6.2049	0.355466	-1.49221
SEPP1	1.01758	2.86267	0.355466	-1.49221
C5orf56	0.801425	2.25457	0.355466	-1.49221
PCYOX1L	1.64385	4.62448	0.355466	-1.49221
HIST1H4C	2.48134	6.98051	0.355466	-1.49221
MIR877	3.7507	10.5515	0.355466	-1.49221
CCDC136	0.20165	0.567284	0.355466	-1.49221
LOC100130673	0.201987	0.568232	0.355466	-1.49221
LINC01111	1.7713	4.98303	0.355466	-1.49221
LINC01301	0.0925606	0.260392	0.355466	-1.49221
CDKN2B	0.919013	2.58537	0.355466	-1.49221
LINC01186	0.984958	2.77089	0.355466	-1.49221
LOC158960	0.539421	1.5175	0.355466	-1.49221
CFL1P1	0.152157	0.42805	0.355466	-1.49221
NNMT	1.0221	2.87537	0.355466	-1.49221
SNORD102	4.48019	12.6037	0.355466	-1.49221
GNG2	0.0838943	0.236012	0.355466	-1.49221
NKX2-8	0.357819	1.00662	0.355466	-1.49221
TMC7	0.492374	1.38515	0.355466	-1.49221
MT1F	1.46292	4.11549	0.355466	-1.49221
PLLP	1.50836	4.24333	0.355466	-1.49221
SLC16A13	0.184539	0.519145	0.355466	-1.49221
ALOX12B	0.128926	0.362696	0.355466	-1.49221
SUZ12P1	1.77238	4.98608	0.355466	-1.49221
GDPD1	1.2657	3.56068	0.355466	-1.49221
DLGAP1-AS2	1.04845	2.94951	0.355466	-1.49221
LOC101927322	0.785807	2.21064	0.355466	-1.49221
VSIG10L	0.351196	0.987987	0.355466	-1.49221
CERS1	0.631878	1.7776	0.355466	-1.49221
FMO9P	0.236838	0.666275	0.355466	-1.49221
GBP2	0.234202	0.658857	0.355466	-1.49221
PPP1R2P3	0.648064	1.82314	0.355466	-1.49221
CAHM	0.364079	1.02423	0.355466	-1.49221
ELFN1	0.172407	0.485017	0.355466	-1.49221
FGF13	0.175979	0.495065	0.355466	-1.49221
ACSL5	0.207712	0.584337	0.355466	-1.49221
SCEL	0.399967	1.12519	0.355466	-1.49221
LOC101926911	0.19912	0.560164	0.355466	-1.49221
ANKRD24	0.160245	0.450803	0.355466	-1.49221
ZNF792	0.165933	0.466803	0.355466	-1.49221
ZNF221	0.132965	0.374058	0.355466	-1.49221
LINC00896	0.146226	0.411363	0.355466	-1.49221
YPEL1	0.082563	0.232267	0.355466	-1.49221
TRIM54	0.170584	0.479887	0.355466	-1.49221
SMKR1	0.311665	0.876779	0.355466	-1.49221
SOWAHD	0.202877	0.570733	0.355466	-1.49221
SLC43A1	0.142589	0.401132	0.355466	-1.49221
LOC728613	0.125223	0.352277	0.355466	-1.49221
PSG10P	0.185174	0.520933	0.355466	-1.49221
FOSB	0.0879427	0.247401	0.355466	-1.49221
CCDC37	0.154637	0.435027	0.355466	-1.49221
WWC2-AS2	0.148037	0.41646	0.355466	-1.49221
ZNF192P1	0.195618	0.550313	0.355466	-1.49221
UBE2Q2P1	0.156286	0.439664	0.355466	-1.49221
SSTR5-AS1	0.109981	0.309399	0.355466	-1.49221
FAM86HP	0.165592	0.465845	0.355466	-1.49221
CPED1	0.0606341	0.170576	0.355466	-1.49221
RBM20	0.0445852	0.125427	0.355466	-1.49221
CCDC176	0.114064	0.320886	0.355466	-1.49221
SLCO2A1	0.0763849	0.214887	0.355466	-1.49221
LRRK2	0.0349711	0.098381	0.355466	-1.49221
RTEL1	3.23382	9.0974	0.355466	-1.49221
FLRT3	0.0842229	0.236936	0.355466	-1.49221
PMEPA1	14.1675	39.7098	0.356777	-1.48691
HPSE	1.40185	3.92521	0.357141	-1.48544
CABYR	0.543053	1.51564	0.3583	-1.48076
ATP8B1	1.49519	4.15435	0.35991	-1.47429
LOC100507291	0.541193	1.50243	0.360213	-1.47308
GDF15	5.91385	16.3848	0.360935	-1.47019
MAP1B	1.66955	4.62104	0.361294	-1.46876
KCNJ12	1.50081	4.12826	0.363545	-1.45979
GLIPR2	0.621992	1.70995	0.363749	-1.45898
RPL31	216.377	594.835	0.36376	-1.45894
TBC1D19	1.34535	3.6877	0.364821	-1.45474
NUMBL	2.13134	5.80329	0.367264	-1.44511
AFAP1L2	0.809267	2.20075	0.367724	-1.44331
A4GALT	2.92968	7.95262	0.368392	-1.44068
TIMP2	66.4563	180.086	0.369025	-1.43821
NCK1-AS1	5.65335	15.2804	0.369975	-1.4345
CMTM7	1.4326	3.86567	0.370595	-1.43208
PITPNC1	0.810614	2.18541	0.370921	-1.43081
TFAP2C	4.50365	12.1418	0.370921	-1.43081
PTGER4	0.755442	2.03666	0.370921	-1.43081
DNAJC12	3.01039	8.10283	0.371523	-1.42848
GDAP1	4.20487	11.311	0.37175	-1.42759
C5orf45	0.775417	2.08254	0.372343	-1.4253
DIXDC1	0.757469	2.02944	0.37324	-1.42183
KLRG1	2.52574	6.76708	0.37324	-1.42183
FHL1	10.6123	28.3949	0.373738	-1.4199
SLIRP	363.686	971.276	0.374441	-1.41719
LOC100506100	7.28031	19.4307	0.374681	-1.41627
HYAL1	0.431182	1.14743	0.375781	-1.41204
C8orf46	0.558569	1.48407	0.376376	-1.40975
SERTAD4	2.8916	7.68273	0.376376	-1.40975
SH3BGRL2	1.18032	3.12515	0.377683	-1.40475
TGM2	24.0223	63.5681	0.377899	-1.40393
ST20	12.4067	32.7872	0.3784	-1.40202
ATP6V1C2	0.155908	0.411176	0.379176	-1.39906
PPIL6	0.0934454	0.246326	0.379356	-1.39837
PRTG	0.565824	1.49071	0.379566	-1.39758
LINC00493	30.1593	79.311	0.380266	-1.39492
HRK	1.07596	2.82511	0.380857	-1.39268
SLC22A3	0.497645	1.30665	0.380857	-1.39268
BAI2	0.297852	0.782057	0.380857	-1.39268
CD9	95.741	251.383	0.380857	-1.39268
LINC00592	1.53169	4.02169	0.380857	-1.39268
GGACT	0.675123	1.77264	0.380857	-1.39268
FRS3	0.740187	1.94348	0.380857	-1.39268
PGAP3	0.648946	1.70391	0.380857	-1.39268
OTUB2	0.416439	1.09343	0.380857	-1.39268
SH3PXD2B	0.20739	0.544534	0.380857	-1.39268
F2R	14.1391	36.9973	0.382165	-1.38773
TMEM54	4.79918	12.5367	0.38281	-1.3853
FAM50B	2.79112	7.29114	0.38281	-1.3853
RPL34	102.949	268.756	0.383058	-1.38437
C21orf67	0.293249	0.763385	0.384143	-1.38029
SRP14-AS1	1.56417	4.0662	0.384676	-1.37828
ENPP5	0.183021	0.475611	0.384811	-1.37778
CDKL3	0.431506	1.12033	0.385161	-1.37647
INHBA	8.30534	21.5567	0.38528	-1.37602
SYT14	1.83977	4.77455	0.38533	-1.37584
TPST1	4.56101	11.7987	0.38657	-1.3712
MAPT	0.872922	2.25658	0.386835	-1.37021
CMTM1	0.980467	2.53348	0.387004	-1.36958
SRRM3	0.356042	0.91815	0.387782	-1.36668
LAT2	0.644503	1.66203	0.387782	-1.36668
ZNF251	1.71639	4.42617	0.387782	-1.36668
EP400NL	2.51519	6.48611	0.387782	-1.36668
SPIRE2	0.397748	1.0257	0.387782	-1.36668
LOC100506325	1.17728	3.03593	0.387782	-1.36668
ZNF225	0.472462	1.21837	0.387782	-1.36668
LOC403323	1.25515	3.23675	0.387782	-1.36668
DDX11-AS1	0.63624	1.64072	0.387782	-1.36668
DSC2	0.992725	2.56001	0.387782	-1.36668
DNM3	0.168997	0.435805	0.387782	-1.36668
EYS	0.121852	0.314229	0.387782	-1.36668
ZNF706	14.9242	38.4585	0.388059	-1.36565
PSG1	0.206447	0.531614	0.388339	-1.36461
PPP1R1C	4.34848	11.1719	0.389234	-1.36129
CDKN1A	9.52509	24.4697	0.389261	-1.36119
AIM1L	1.41453	3.63332	0.38932	-1.36097
RPS27A	93.1142	238.465	0.390473	-1.35671
LHX1	4.51283	11.5494	0.390742	-1.35571
AADACP1	5.50552	14.0802	0.391013	-1.35471
COMMD6	15.7956	40.3318	0.391642	-1.35239
NEAT1	40.5916	103.421	0.392488	-1.34928
CLIC4	22.4798	57.2368	0.39275	-1.34832
DHRS3	1.31051	3.33563	0.392884	-1.34782
LRRC17	1.04683	2.66448	0.392884	-1.34782
ACOT13	13.8199	35.1532	0.393132	-1.34692
C8orf59	84.5171	214.648	0.393747	-1.34466
TNNT1	11.2271	28.5027	0.393895	-1.34412
RAB30-AS1	8.14822	20.6753	0.394104	-1.34335
SLC22A18	1.92517	4.88168	0.394367	-1.34239
MT1X	21.5581	54.6576	0.394422	-1.34219
RAB26	1.98629	5.02906	0.394963	-1.34021
DBP	3.56238	9.01954	0.394963	-1.34021
KLK6	4.81486	12.1907	0.394963	-1.34021
IDH2	4.84172	12.2389	0.3956	-1.33789
GNE	0.877278	2.21484	0.396091	-1.3361
ZNF85	1.16518	2.93946	0.396393	-1.335
HEBP2	25.1618	63.4707	0.396431	-1.33486
DYRK4	8.65273	21.7751	0.397367	-1.33145
USP2	0.722357	1.81614	0.397742	-1.33009
TCEB1	39.6748	99.6433	0.398169	-1.32855
SH3BGRL	12.9164	32.4039	0.398606	-1.32697
SKIL	14.9219	37.3376	0.399649	-1.3232
CTC-338M12.4	1.37265	3.4325	0.3999	-1.32229
LOC100507547	1.3007	3.25257	0.3999	-1.32229
LOC100288748	0.443299	1.10852	0.3999	-1.32229
C1QL3	0.388643	0.971851	0.3999	-1.32229
AAMDC	1.92008	4.80141	0.3999	-1.32229
SYT16	0.616972	1.54282	0.3999	-1.32229
SLC25A21-AS1	0.697205	1.74345	0.3999	-1.32229
LOC102724927	0.702265	1.7561	0.3999	-1.32229
SULT1A2	1.97019	4.92672	0.3999	-1.32229
ZSCAN30	1.17692	2.94303	0.3999	-1.32229
RBM11	0.491978	1.23025	0.3999	-1.32229
KCNK3	0.243268	0.608323	0.3999	-1.32229
GSAP	0.297669	0.744358	0.3999	-1.32229
ATP8B5P	0.385393	0.963723	0.3999	-1.32229
KIAA1755	0.150923	0.377403	0.3999	-1.32229
MFAP5	0.335781	0.839663	0.3999	-1.32229
RUNDC3B	0.247943	0.620013	0.3999	-1.32229
SPOCD1	0.386934	0.967577	0.3999	-1.32229
SULF2	9.35747	23.3894	0.400073	-1.32166
DLL3	0.947552	2.3655	0.400571	-1.31987
GPCPD1	3.6045	8.97658	0.401545	-1.31637
SULT2B1	0.607355	1.51244	0.401572	-1.31627
LARP6	19.4405	48.3184	0.402342	-1.31351
ST3GAL6	1.13883	2.83023	0.402381	-1.31336
SUN3	3.34026	8.27817	0.403502	-1.30935
USP27X	1.67322	4.14675	0.403502	-1.30935
C16orf45	2.3224	5.75561	0.403502	-1.30935
SLC15A2	0.653464	1.6155	0.404496	-1.3058
SOX9	0.90196	2.22983	0.404496	-1.3058
MMP19	0.396555	0.980117	0.404599	-1.30543
SNCG	16.7926	41.3816	0.405798	-1.30117
MRPS33	24.647	60.6736	0.406224	-1.29965
LOX	0.498472	1.22702	0.406247	-1.29957
RAB13	16.7783	41.2636	0.406613	-1.29827
SERTAD4-AS1	5.24182	12.8558	0.407741	-1.29428
RPS28	81.0656	198.756	0.407866	-1.29383
LRRC27	0.122084	0.299121	0.408143	-1.29285
ETNK2	1.23591	3.0133	0.410154	-1.28576
EREG	0.348502	0.849687	0.410154	-1.28576
LOC101927934	1.45566	3.54905	0.410154	-1.28576
ZNF34	0.594715	1.44998	0.410154	-1.28576
IRAK3	0.399373	0.973716	0.410154	-1.28576
REEP6	1.1747	2.86406	0.410154	-1.28576
PPM1N	0.940997	2.29425	0.410154	-1.28576
ZNF204P	1.0049	2.44672	0.410714	-1.28379
DGCR5	0.405881	0.98628	0.411527	-1.28094
PITPNA-AS1	15.9117	38.6589	0.411593	-1.28071
C3	1.07503	2.60919	0.412018	-1.27922
SULT1A1	9.80772	23.8036	0.412027	-1.27919
TTC32	4.72635	11.4495	0.4128	-1.27649
TSC22D3	1.98303	4.80387	0.4128	-1.27649
[truncated: 13,332 more rows]
